# Supplementary material
Source: PubMed Central journal article supplement (PMC4548883)

## Supporting Information Spectra

# Asymmetric Synthesis of Deoxypropionate Derivatives via Catalytic Hydrogenolysis of Enantioenriched Z-Ketene Heterodimers.

Shi Chen<sup>a</sup>, Ahmad A. Ibrahim<sup>a,†</sup>, Mukulesh Mondal<sup>a</sup>, Anthony J. Magee<sup>a</sup>, Adam J. Cruz<sup>a</sup>, Kraig A. Wheeler<sup>b</sup> and Nessian J. Kerrigan<sup>a,\*</sup>

<sup>a</sup>Department of Chemistry, Oakland University, 2200 N. Squirrel Road, Rochester, MI 48309-4477, USA.

<sup>b</sup>Department of Chemistry, Eastern Illinois University, 600 Lincoln Avenue, Charleston, IL 61920-3099, USA

### Table of Contents:

|                                                          |       |
|----------------------------------------------------------|-------|
| Racemized GC of (±)- <b>3a</b>                           | SI-3  |
| Chiral GC of (+)- <b>3a</b>                              | SI-4  |
| <sup>1</sup> H and <sup>13</sup> C NMR of (+)- <b>3a</b> | SI-5  |
| Chiral GC of (–)- <b>3a</b>                              | SI-6  |
| <sup>1</sup> H and <sup>13</sup> C NMR of (–)- <b>3a</b> | SI-7  |
| Racemized GC of (±)- <b>3b</b>                           | SI-8  |
| Chiral GC of (+)- <b>3b</b>                              | SI-9  |
| <sup>1</sup> H and <sup>13</sup> C NMR of (+)- <b>3b</b> | SI-10 |
| Chiral GC of (–)- <b>3b</b>                              | SI-11 |
| <sup>1</sup> H and <sup>13</sup> C NMR of (–)- <b>3b</b> | SI-12 |
| Racemized HPLC of (±)- <b>3c</b>                         | SI-13 |
| Chiral HPLC of (+)- <b>3c</b>                            | SI-14 |
| <sup>1</sup> H and <sup>13</sup> C NMR of (+)- <b>3c</b> | SI-15 |
| Chiral HPLC of (–)- <b>3c</b>                            | SI-16 |
| <sup>1</sup> H and <sup>13</sup> C NMR of (–)- <b>3c</b> | SI-17 |
| Racemized GC of (±)- <b>3d</b>                           | SI-18 |
| Chiral GC of (+)- <b>3d</b>                              | SI-19 |
| <sup>1</sup> H and <sup>13</sup> C NMR of (+)- <b>3d</b> | SI-20 |
| Chiral GC of (–)- <b>3d</b>                              | SI-21 |
| <sup>1</sup> H and <sup>13</sup> C NMR of (–)- <b>3d</b> | SI-22 |
| Racemized GC of (±)- <b>3e</b>                           | SI-23 |
| Chiral GC of (+)- <b>3e</b>                              | SI-24 |
| <sup>1</sup> H and <sup>13</sup> C NMR of (+)- <b>3e</b> | SI-25 |

|                                                                                  |       |
|----------------------------------------------------------------------------------|-------|
| Chiral GC of (-)- <b>3e</b>                                                      | SI-26 |
| <sup>1</sup> H and <sup>13</sup> C NMR of (-)- <b>3e</b>                         | SI-27 |
| Racemized GC of (±)- <b>3f</b>                                                   | SI-28 |
| Chiral GC of (+)- <b>3f</b>                                                      | SI-29 |
| <sup>1</sup> H and <sup>13</sup> C NMR of (+)- <b>3f</b>                         | SI-30 |
| Chiral GC of (-)- <b>3f</b>                                                      | SI-31 |
| <sup>1</sup> H and <sup>13</sup> C NMR of (-)- <b>3f</b>                         | SI-32 |
| <sup>1</sup> H and <sup>13</sup> C NMR of (+)- <b>3g</b>                         | SI-33 |
| <sup>1</sup> H and <sup>13</sup> C NMR of (-)- <b>3g</b>                         | SI-34 |
| <sup>1</sup> H and <sup>13</sup> C NMR of (+)- <b>3h</b>                         | SI-35 |
| <sup>1</sup> H and <sup>13</sup> C NMR of (-)- <b>3h</b>                         | SI-36 |
| <sup>1</sup> H and <sup>13</sup> C NMR of (-)- <b>3i</b>                         | SI-37 |
| <sup>1</sup> H and <sup>13</sup> C NMR of (+)- <b>3i</b>                         | SI-38 |
| <sup>1</sup> H and <sup>13</sup> C NMR of (+)- <b>4</b>                          | SI-39 |
| <sup>1</sup> H and <sup>13</sup> C NMR of (+)- <b>6</b>                          | SI-40 |
| Racemized GC of <i>trans</i> -( <b>3S</b> )- <b>2a</b>                           | SI-41 |
| Chiral GC of <i>trans</i> -( <b>3S</b> )- <b>2a</b>                              | SI-42 |
| <sup>1</sup> H and <sup>13</sup> C NMR of <i>trans</i> -( <b>3S</b> )- <b>2a</b> | SI-43 |
| Racemized GC of <i>cis</i> -( <b>3S</b> )- <b>2a</b>                             | SI-44 |
| Chiral GC of <i>cis</i> -( <b>3S</b> )- <b>2a</b>                                | SI-45 |
| <sup>1</sup> H and <sup>13</sup> C NMR of <i>cis</i> -( <b>3S</b> )- <b>2a</b>   | SI-46 |
| Chiral GC of <i>trans</i> -( <b>3R</b> )- <b>2a</b>                              | SI-47 |
| <sup>1</sup> H and <sup>13</sup> C NMR of <i>trans</i> -( <b>3R</b> )- <b>2a</b> | SI-48 |
| Chiral GC of <i>cis</i> -( <b>3R</b> )- <b>2a</b>                                | SI-49 |
| <sup>1</sup> H and <sup>13</sup> C NMR of <i>cis</i> -( <b>3R</b> )- <b>2a</b>   | SI-50 |
| <sup>1</sup> H and <sup>13</sup> C NMR of (+)- <b>3aa</b>                        | SI-51 |
| <sup>1</sup> H and <sup>13</sup> C NMR of (-)- <b>3ii</b>                        | SI-52 |

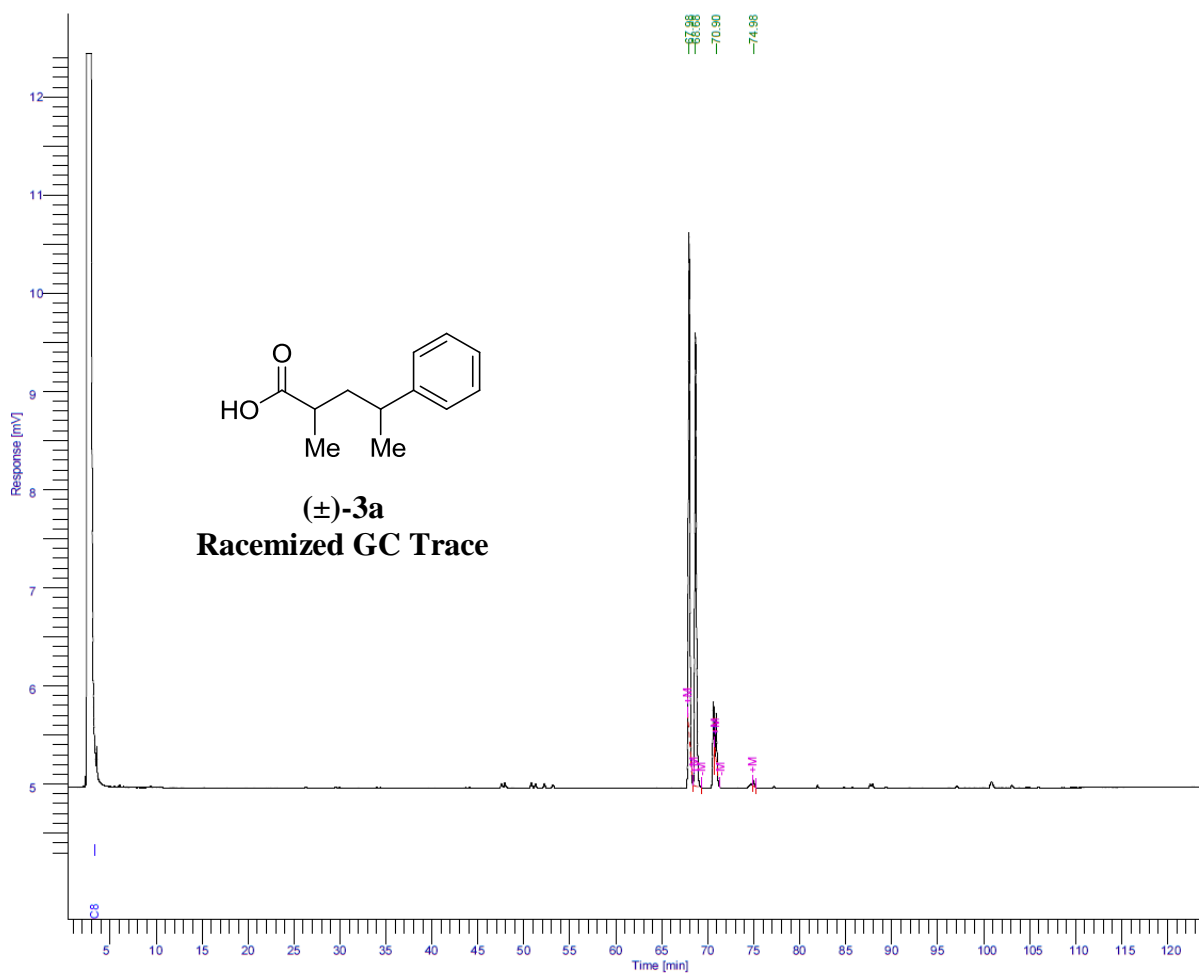

| Peak # | Component Name | Time [min] | Area [uV*sec] | Height [uV] | Area/Amount | Raw Amount |
|--------|----------------|------------|---------------|-------------|-------------|------------|
| 1      |                | 67.984     | 53071.65      | 5124.37     | -----       | -----      |
| 2      |                | 68.675     | 56194.09      | 4611.50     | 1.0000e+06  | 0.0562     |
| 3      |                | 70.903     | 3965.89       | 467.56      | 1.0000e+06  | 0.0040     |
| 4      |                | 74.985     | 573.67        | 59.37       | 1.0000e+06  | 0.0006     |
|        |                |            | 113805.31     | 10262.80    | 3.0000e+06  | 0.0607     |

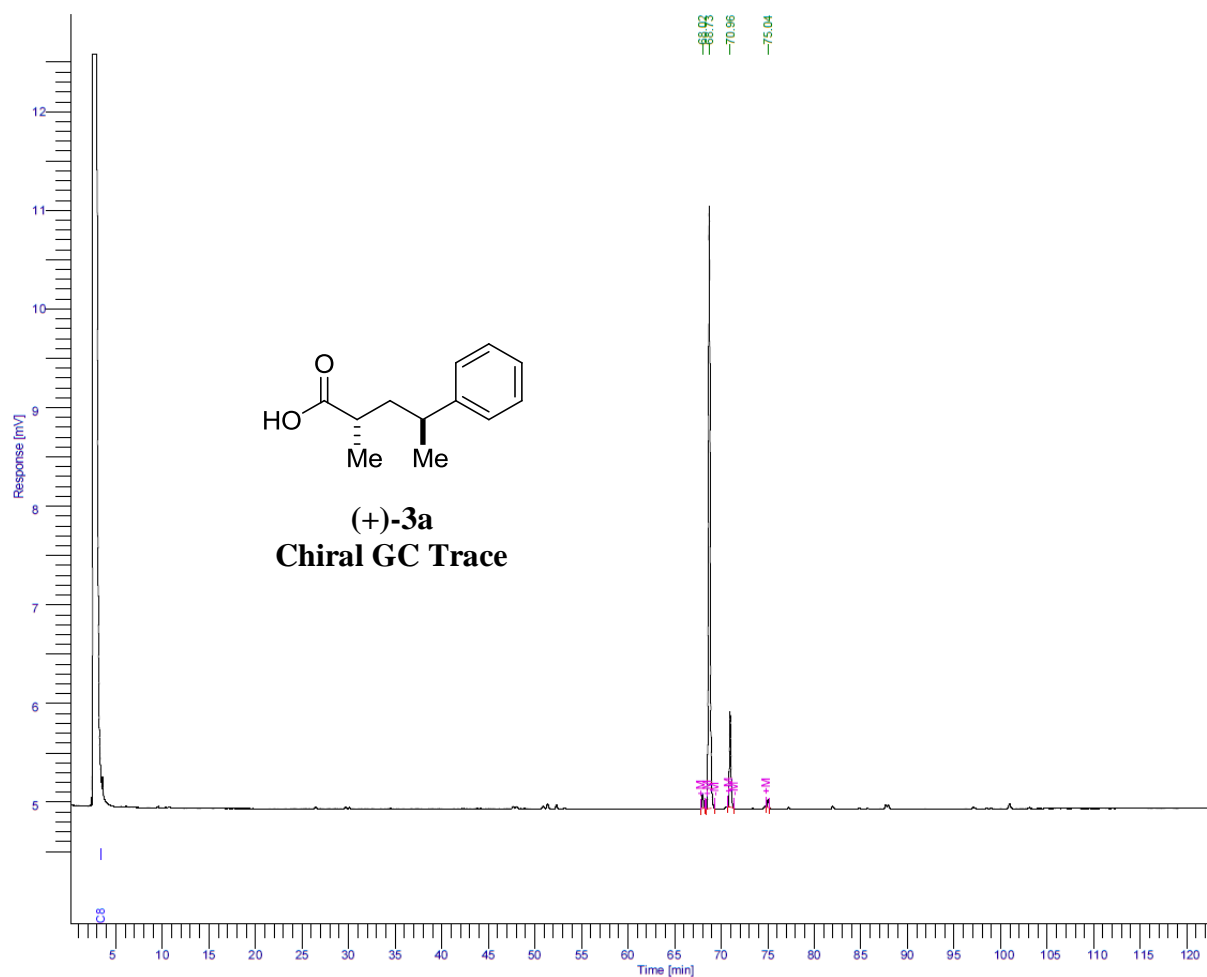

| Peak # | Component Name | Time [min] | Area [uV*sec] | Height [uV] | Area/ Amount | Raw Amount |
|--------|----------------|------------|---------------|-------------|--------------|------------|
| 1      |                | 68.021     | 1612.64       | 144.34      | -----        | -----      |
| 2      |                | 68.733     | 75492.97      | 6089.32     | 1.0000e+06   | 0.0755     |
| 3      |                | 70.965     | 11045.13      | 963.53      | 1.0000e+06   | 0.0110     |
| 4      |                | 75.037     | 875.08        | 85.50       | 1.0000e+06   | 0.0009     |
|        |                |            | 89025.82      | 7282.70     | 3.0000e+06   | 0.0874     |

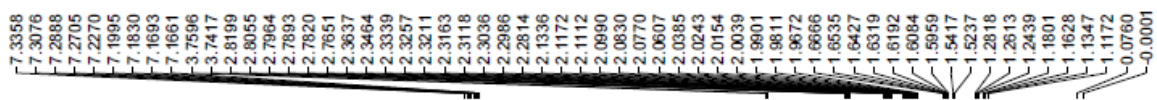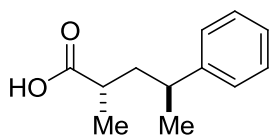

**(+)-3a**  
**<sup>1</sup>H NMR**

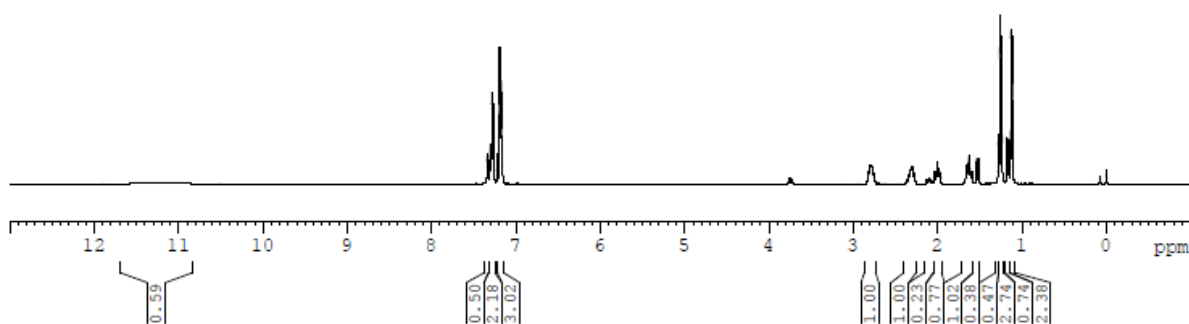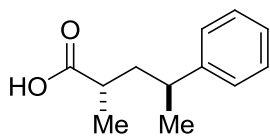

**(+)-3a**  
**<sup>13</sup>C NMR**

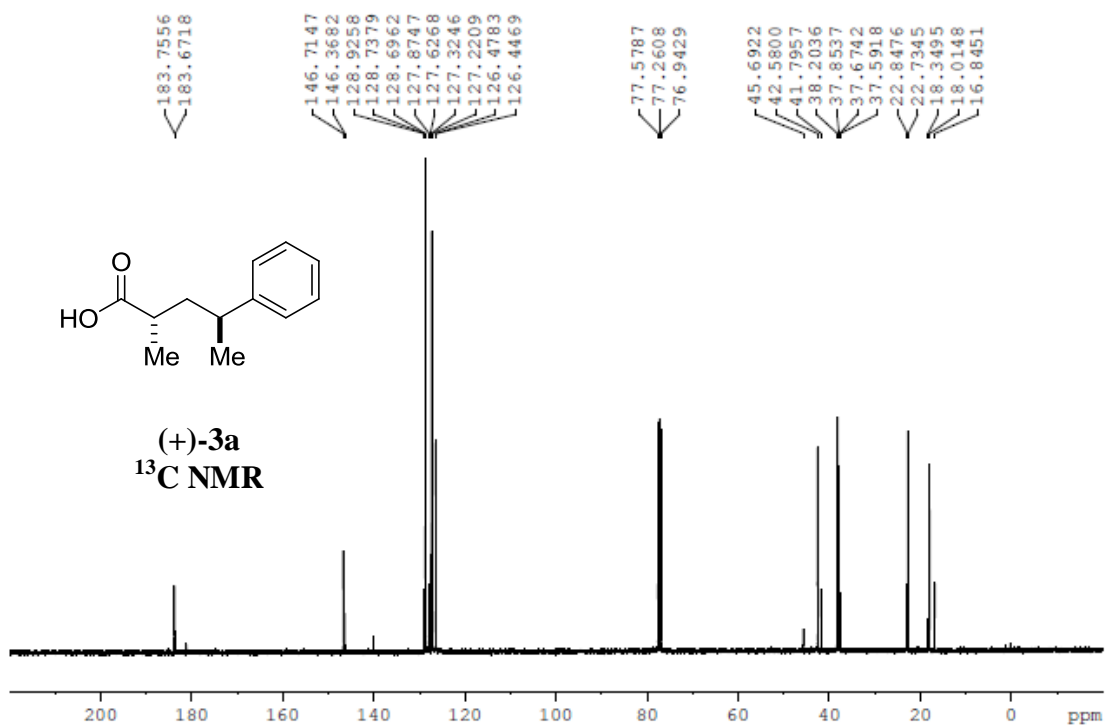

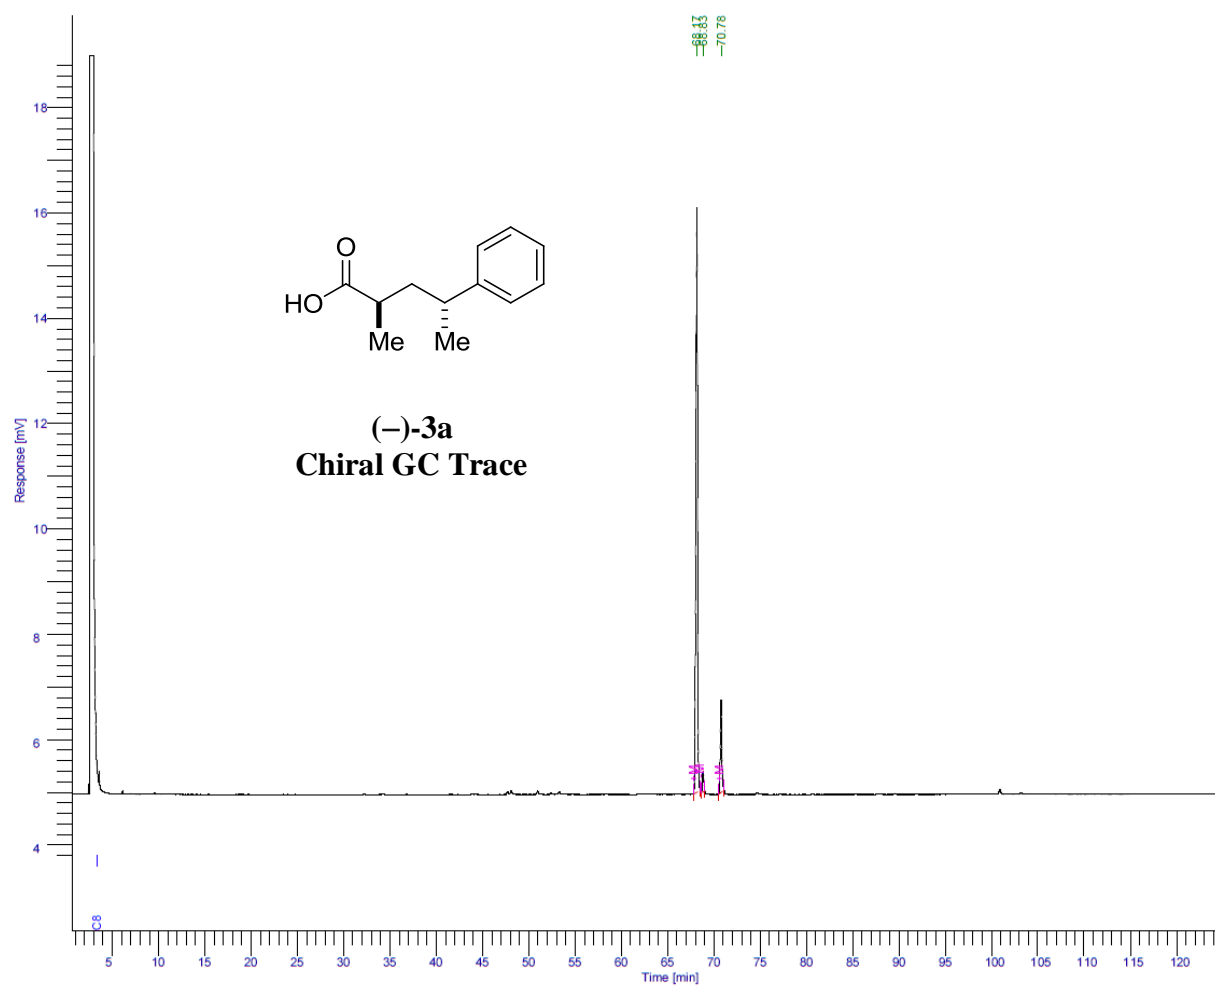

| Peak # | Time [min] | Area [ $\mu\text{V}\cdot\text{s}$ ] | Height [ $\mu\text{V}$ ] | Area [%] | Norm. Area [%] | BL  | Area/Height [s] |
|--------|------------|-------------------------------------|--------------------------|----------|----------------|-----|-----------------|
| -      | 3.350      | 0.00                                | 0.00                     | 0.00     | 0.00           |     | -----           |
| 1      | 68.171     | 134403.31                           | 11091.31                 | 84.30    | 84.30          | *BB | 12.1179         |
| 2      | 68.832     | 4208.51                             | 391.73                   | 2.64     | 2.64           | *BB | 10.7434         |
| 3      | 70.776     | 20826.96                            | 1748.20                  | 13.06    | 13.06          | *BB | 11.9134         |
|        |            | 159438.79                           | 13231.23                 | 100.00   | 100.00         |     |                 |

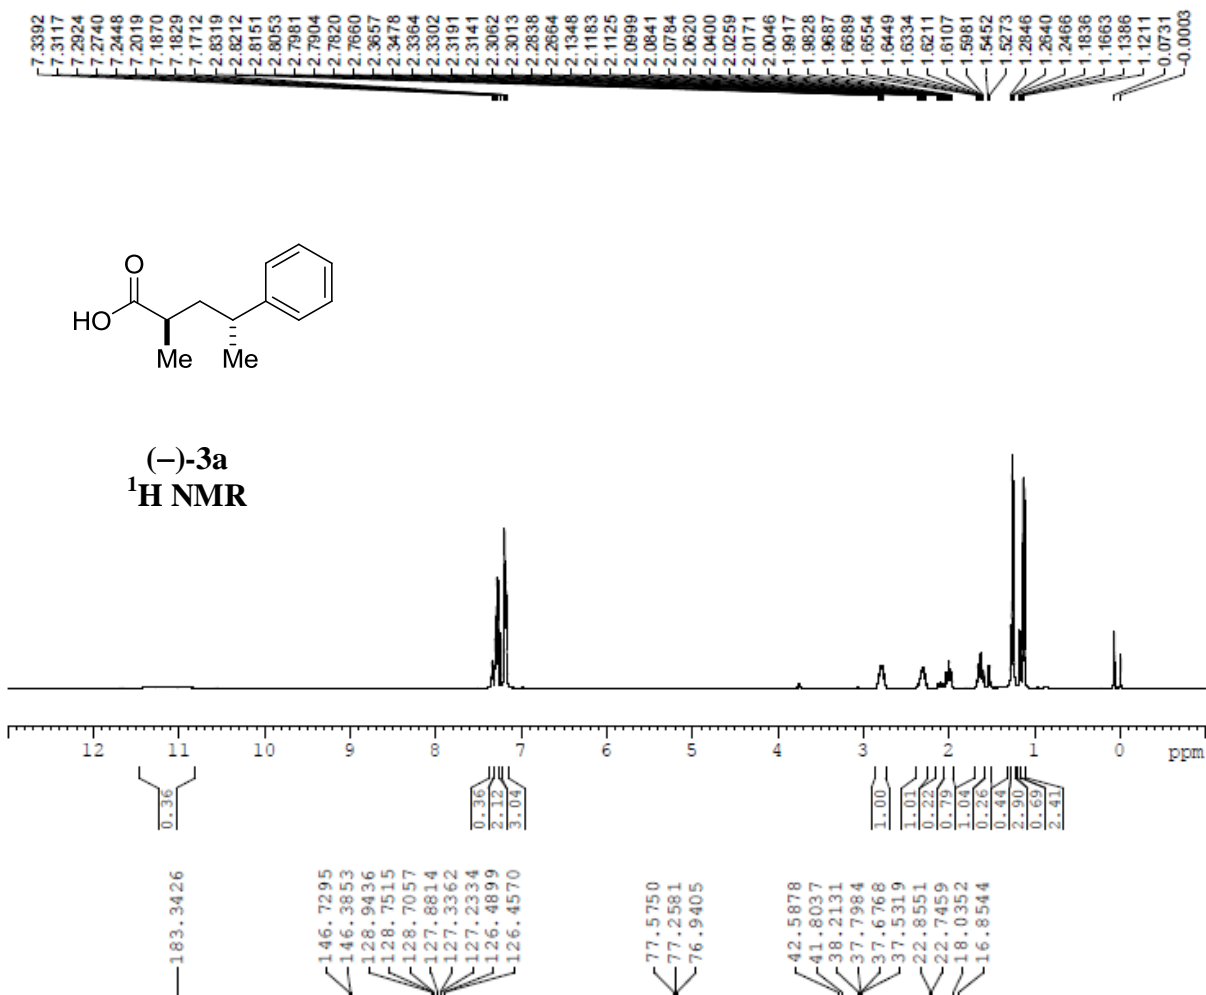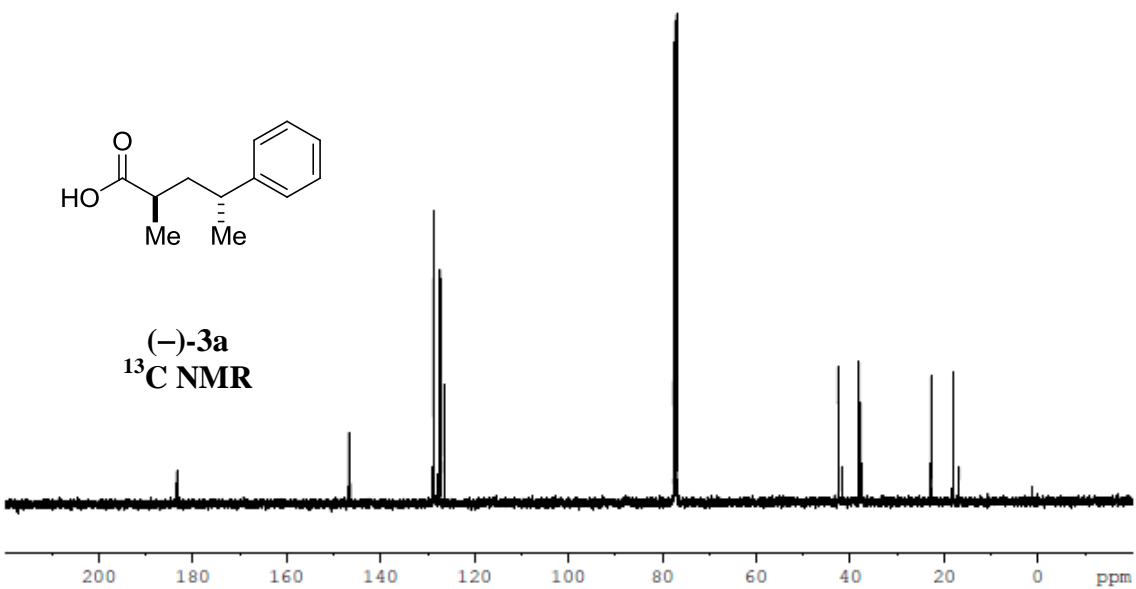

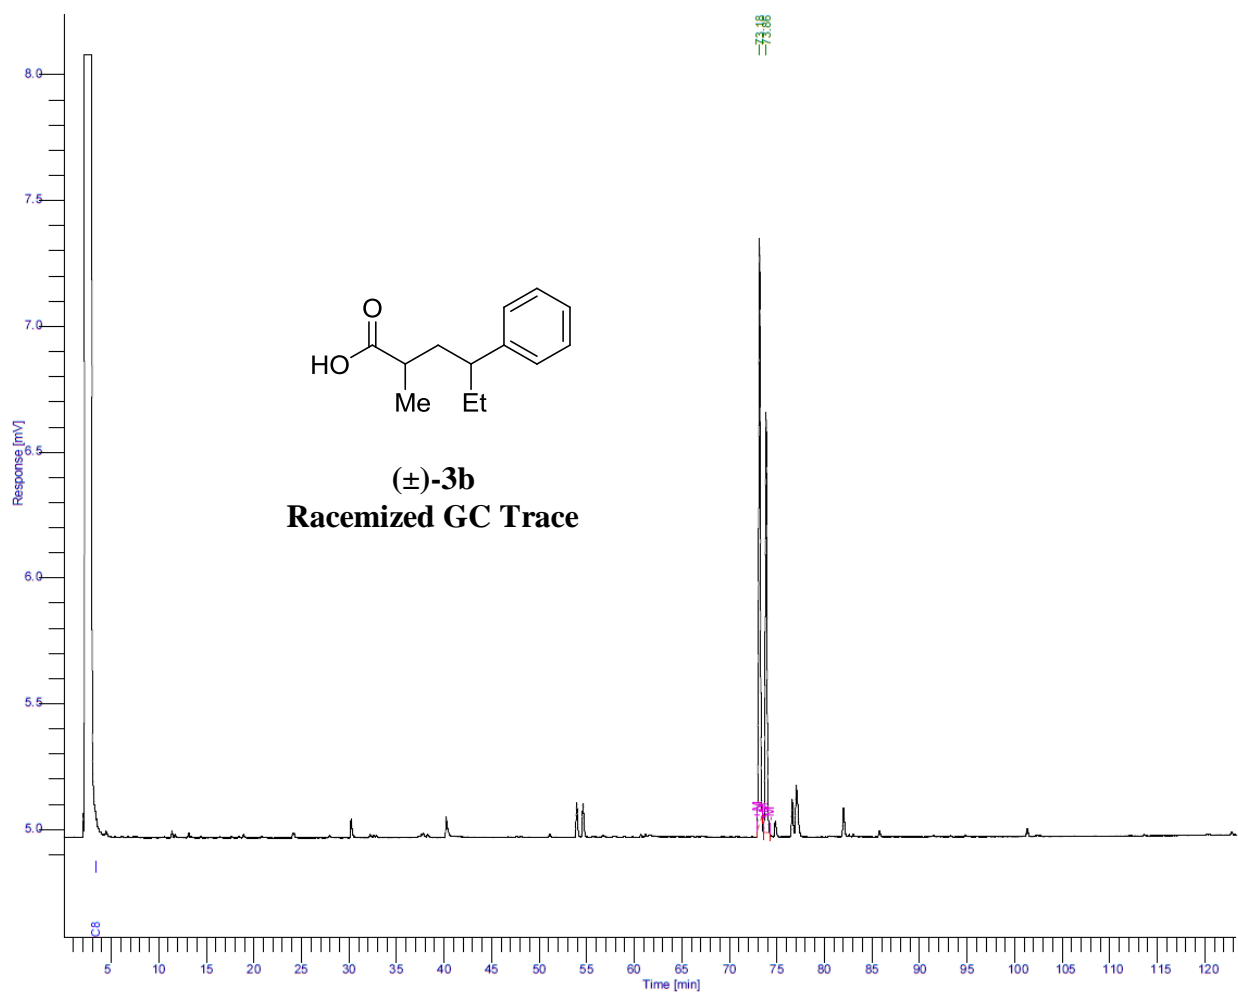

| Peak # | Component Name | Time [min] | Area [uV*sec] | Height [uV] | Area/Amount | Raw Amount |
|--------|----------------|------------|---------------|-------------|-------------|------------|
| 1      |                | 73.179     | 27229.92      | 2321.66     | -----       | -----      |
| 2      |                | 73.864     | 19937.60      | 1667.17     | 1.0000e+06  | 0.0199     |
|        |                |            | 47167.52      | 3988.84     | 1.0000e+06  | 0.0199     |



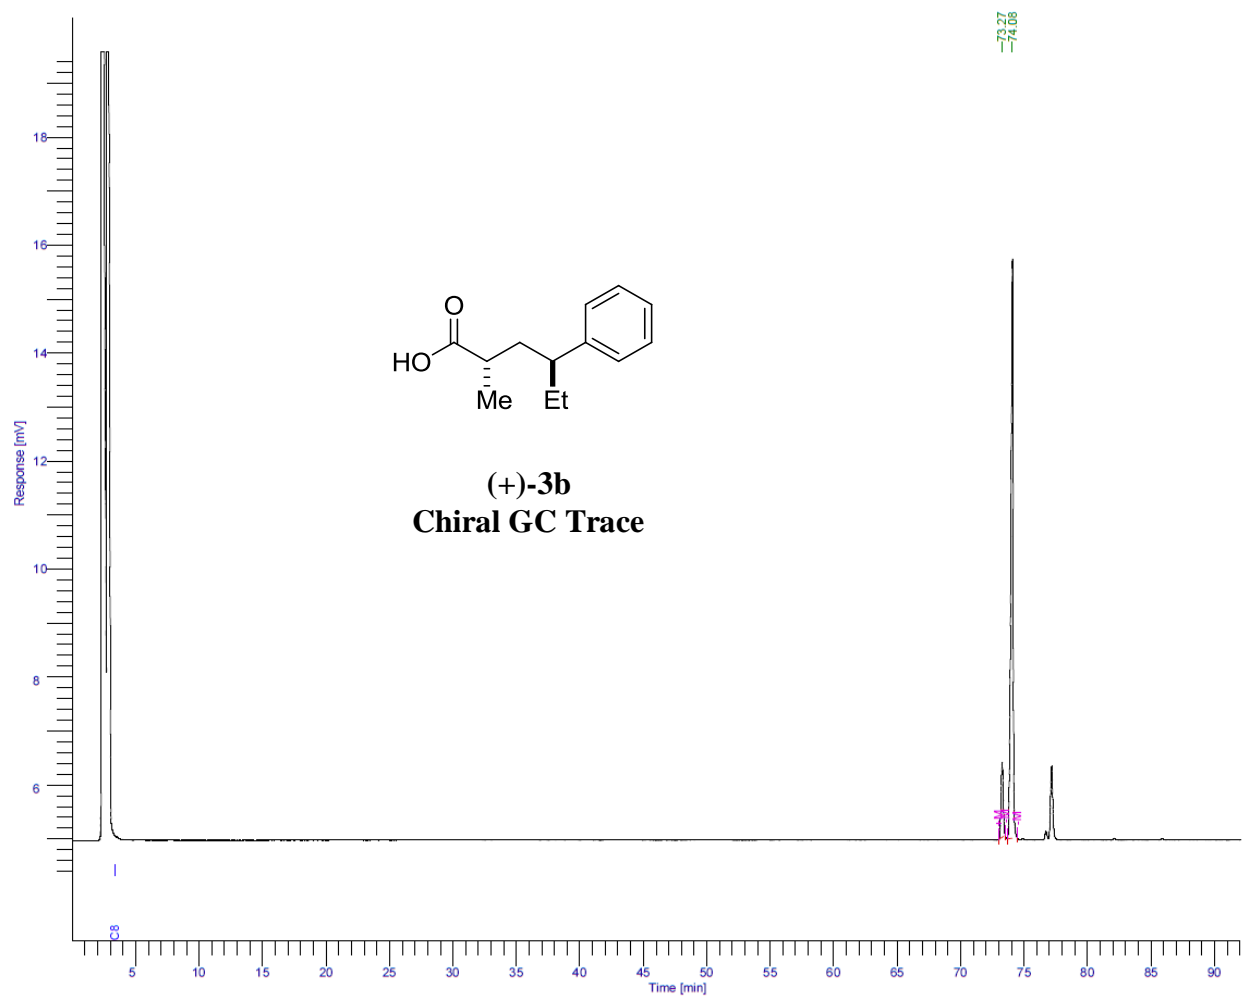

| Peak # | Component Name | Time [min] | Area [uV*sec] | Height [uV] | Area/Amount | Raw Amount |
|--------|----------------|------------|---------------|-------------|-------------|------------|
| 1      |                | 73.275     | 15831.56      | 1389.85     | -----       | -----      |
| 2      |                | 74.082     | 132224.61     | 10721.06    | 1.0000e+06  | 0.1322     |
|        |                |            | 148056.16     | 12110.91    | 1.0000e+06  | 0.1322     |

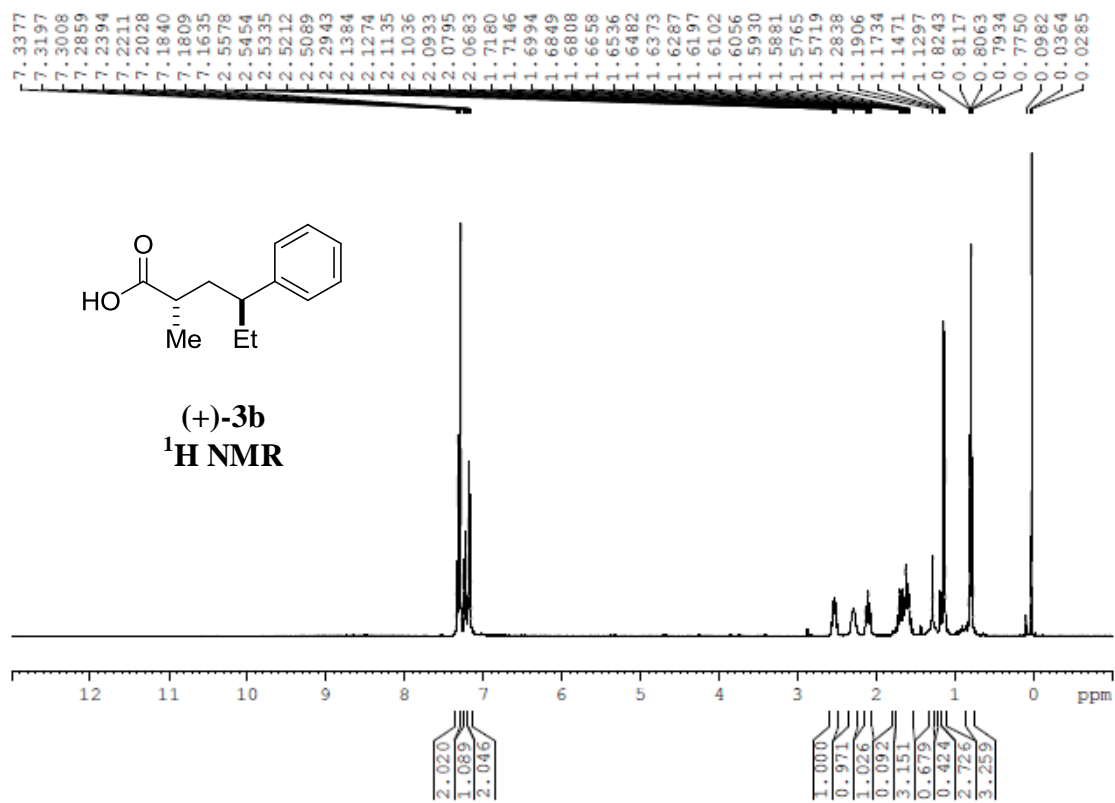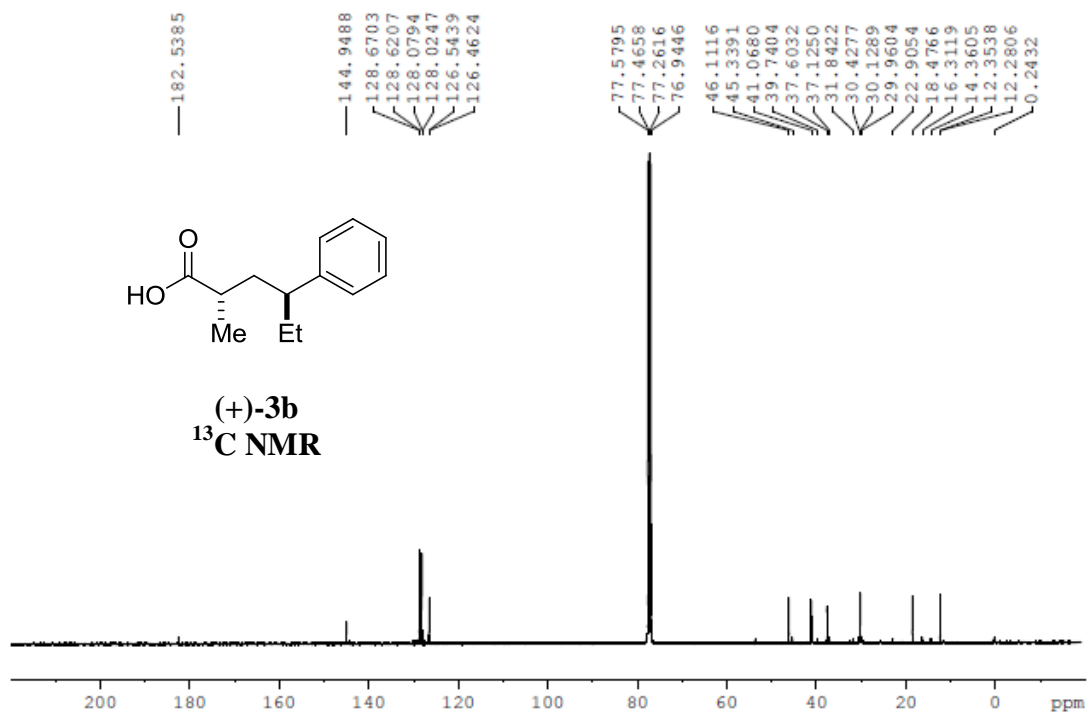

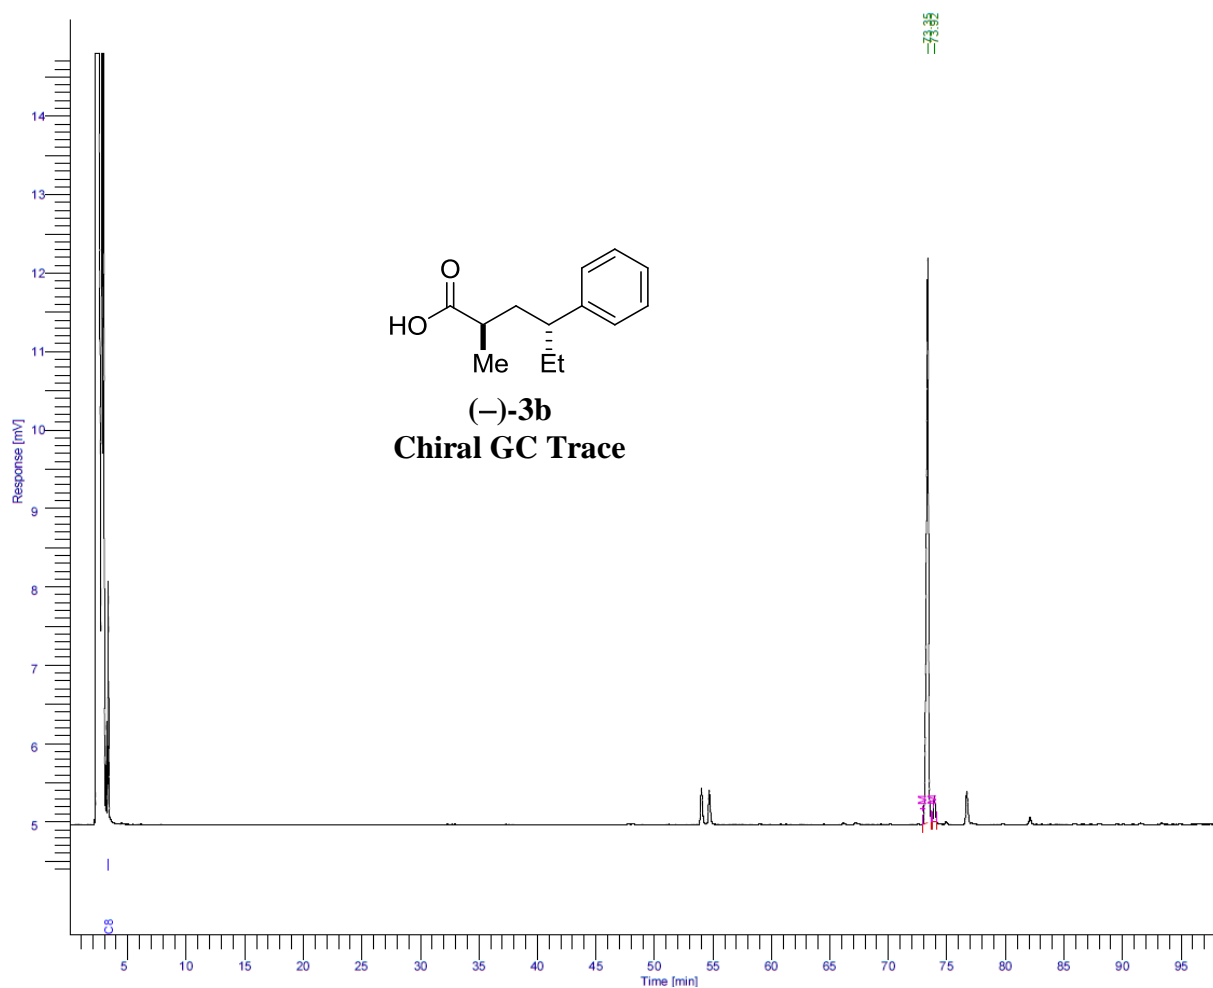

| Peak # | Component Name | Time [min] | Area [uV*sec] | Height [uV] | Area/Amount | Raw Amount |
|--------|----------------|------------|---------------|-------------|-------------|------------|
| 1      |                | 73.349     | 88987.08      | 7205.18     | -----       | -----      |
| 2      |                | 73.923     | 3590.13       | 333.49      | 1.0000e+06  | 0.0036     |
|        |                |            | 92577.21      | 7538.67     | 1.0000e+06  | 0.0036     |

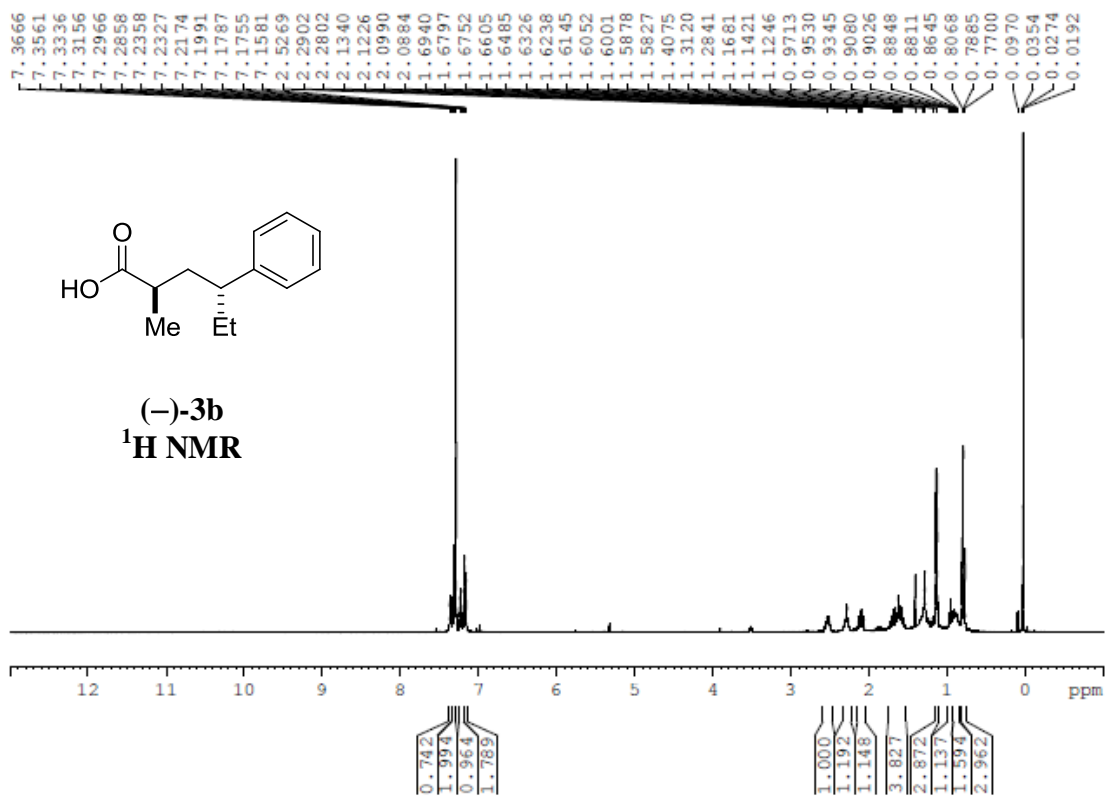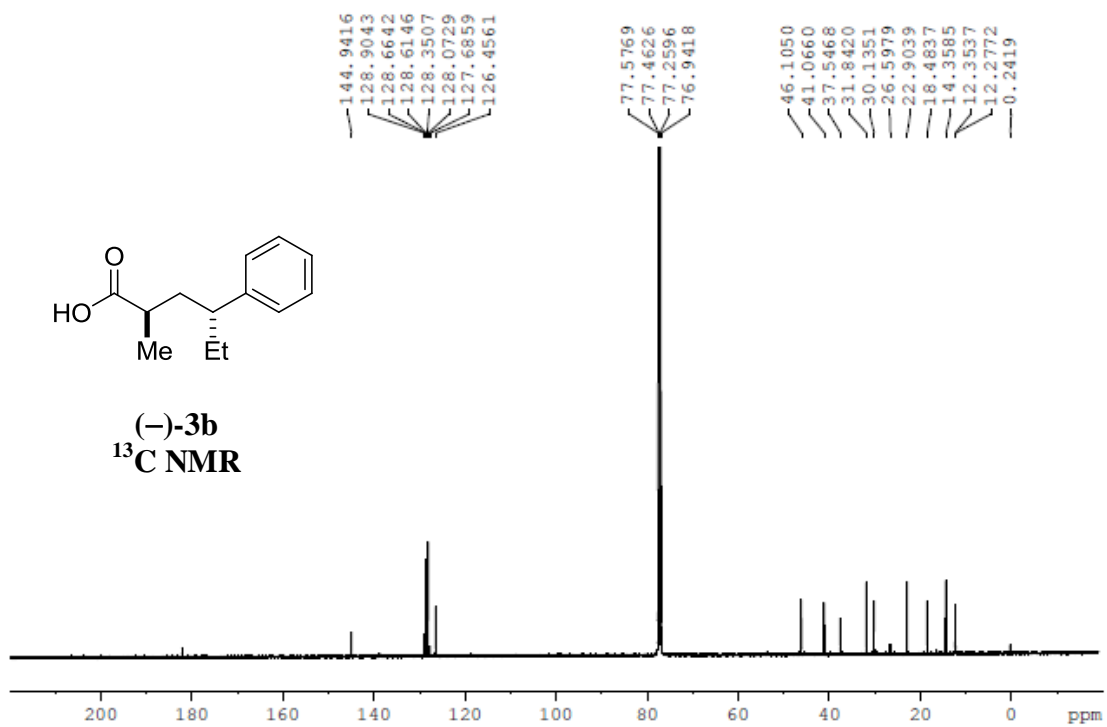

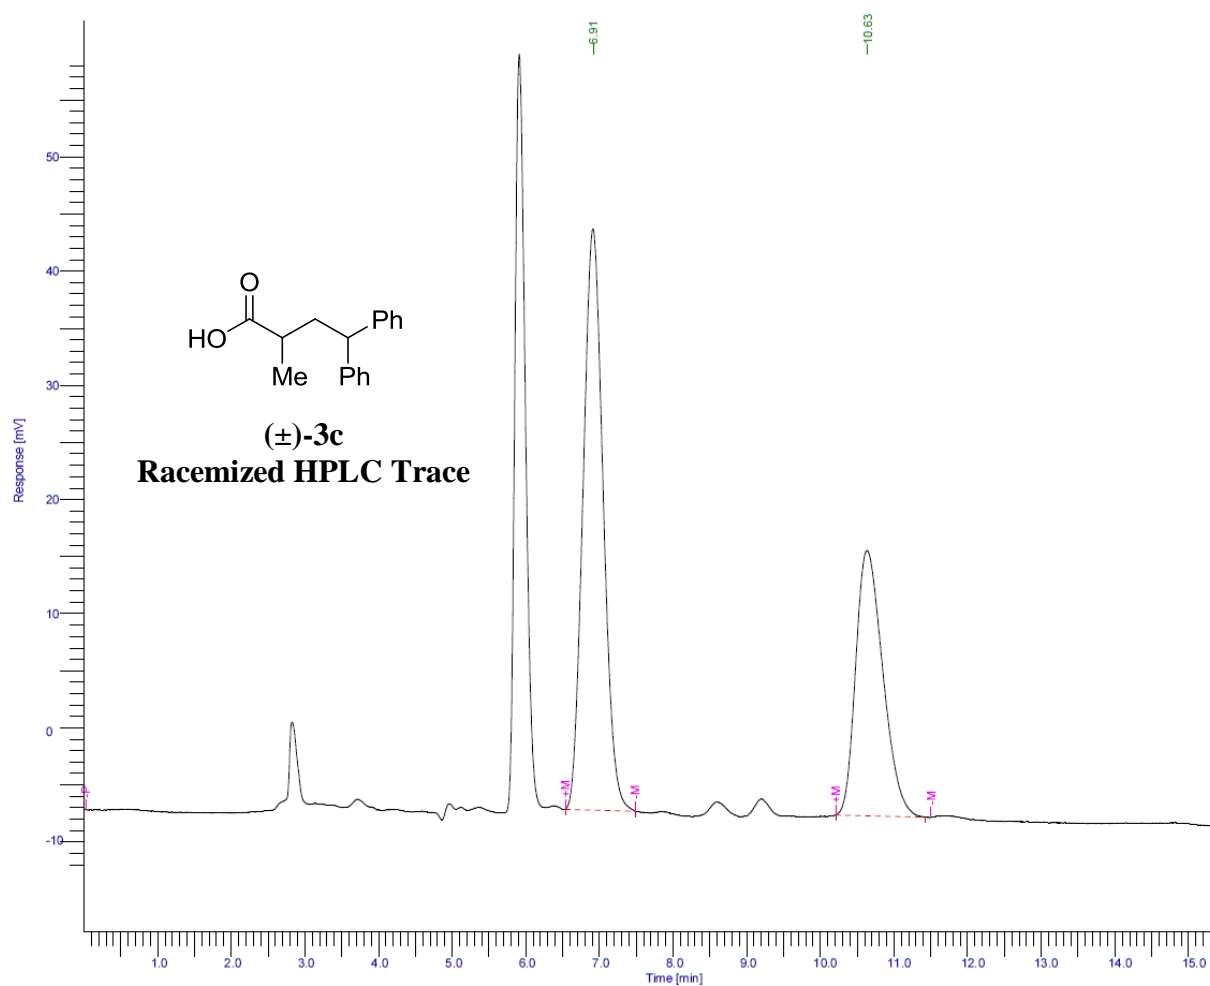

| Peak # | Time [min] | Area [μV·s] | Height [μV] | Area [%] | Norm. Area [%] | BL  | Area/Height [s] |
|--------|------------|-------------|-------------|----------|----------------|-----|-----------------|
| 1      | 6.911      | 961556.78   | 50919.15    | 61.81    | 61.81          | *BB | 18.8840         |
| 2      | 10.635     | 594066.34   | 23230.70    | 38.19    | 38.19          | *BB | 25.5725         |
|        |            | 1555623.12  | 74149.85    | 100.00   | 100.00         |     |                 |

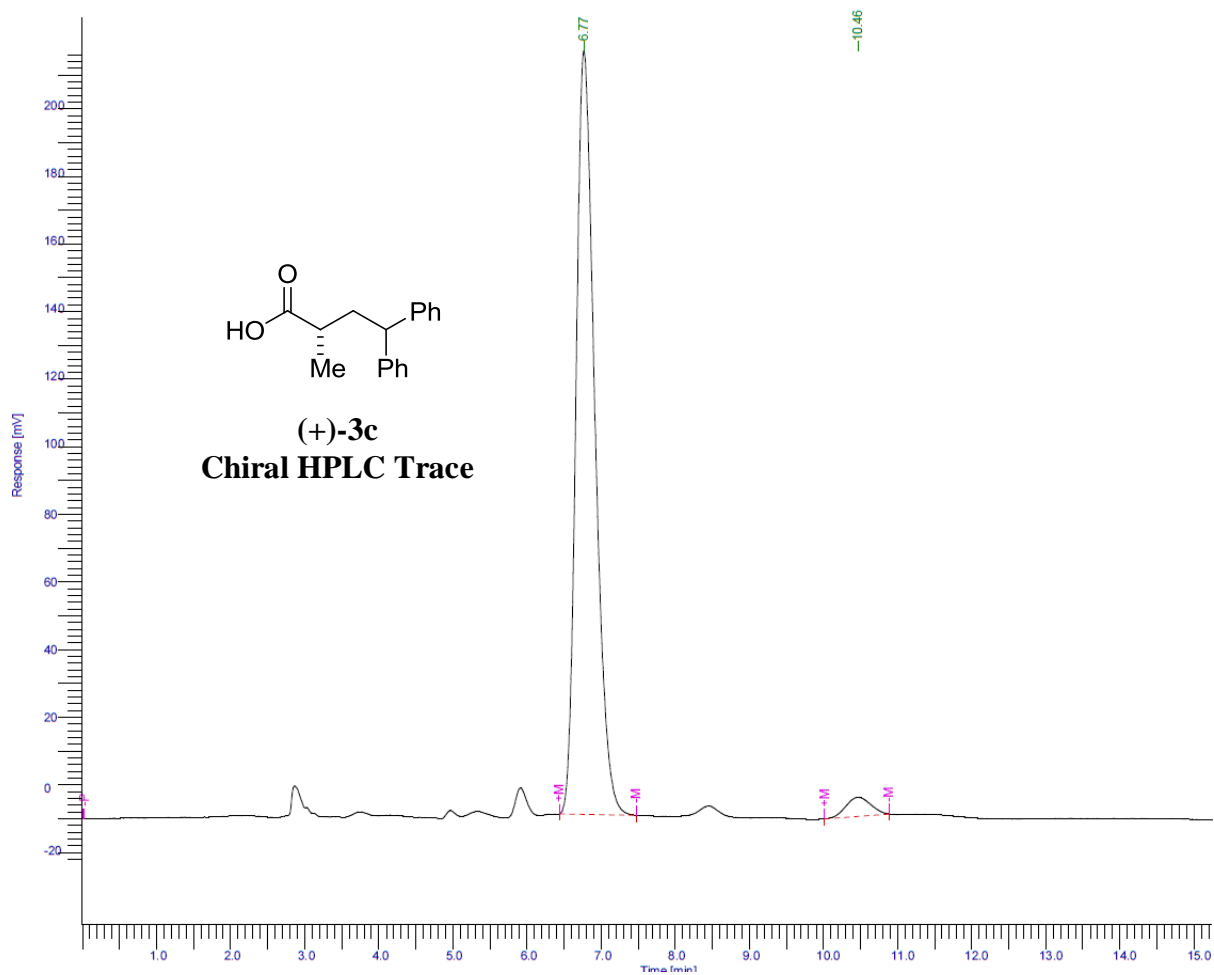

| Peak # | Time [min] | Area [ $\mu\text{V}\cdot\text{s}$ ] | Height [ $\mu\text{V}$ ] | Area [%] | Norm. Area [%] | BL  | Area/Height [s] |
|--------|------------|-------------------------------------|--------------------------|----------|----------------|-----|-----------------|
| 1      | 6.767      | 3974567.07                          | 225869.27                | 96.81    | 96.81          | *BB | 17.5968         |
| 2      | 10.464     | 131120.36                           | 5636.99                  | 3.19     | 3.19           | *BB | 23.2607         |
|        |            | 4105687.43                          | 231506.25                | 100.00   | 100.00         |     |                 |

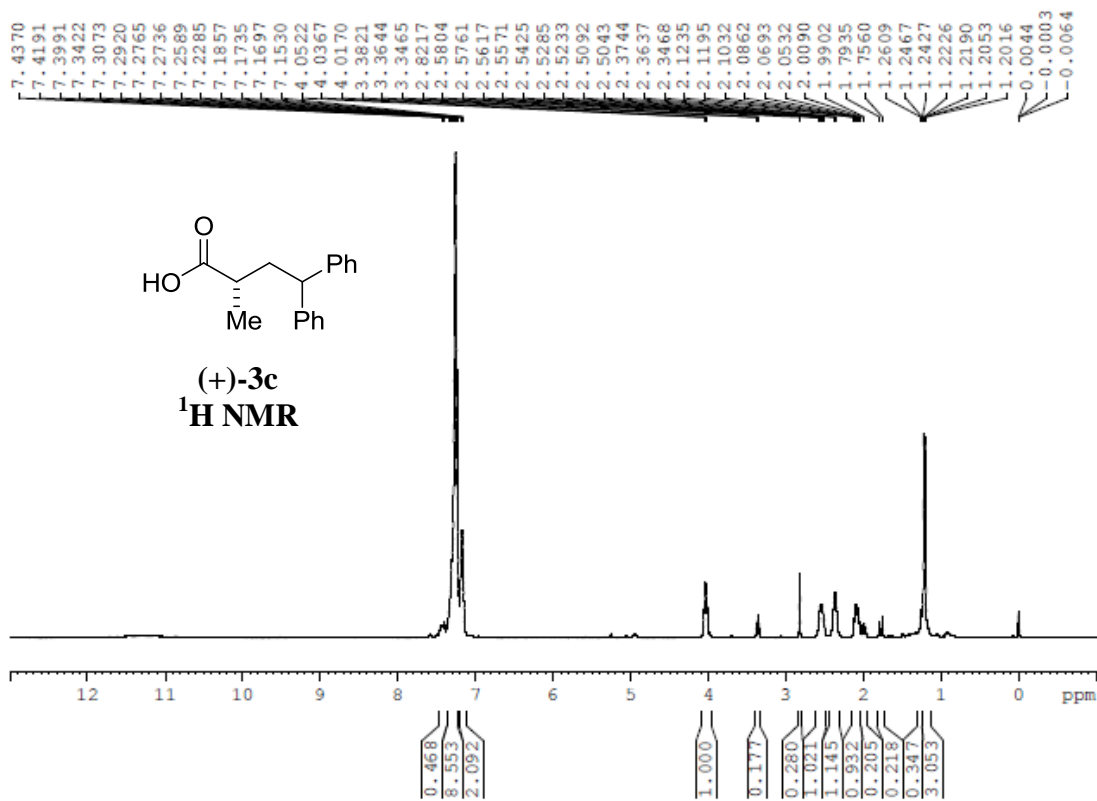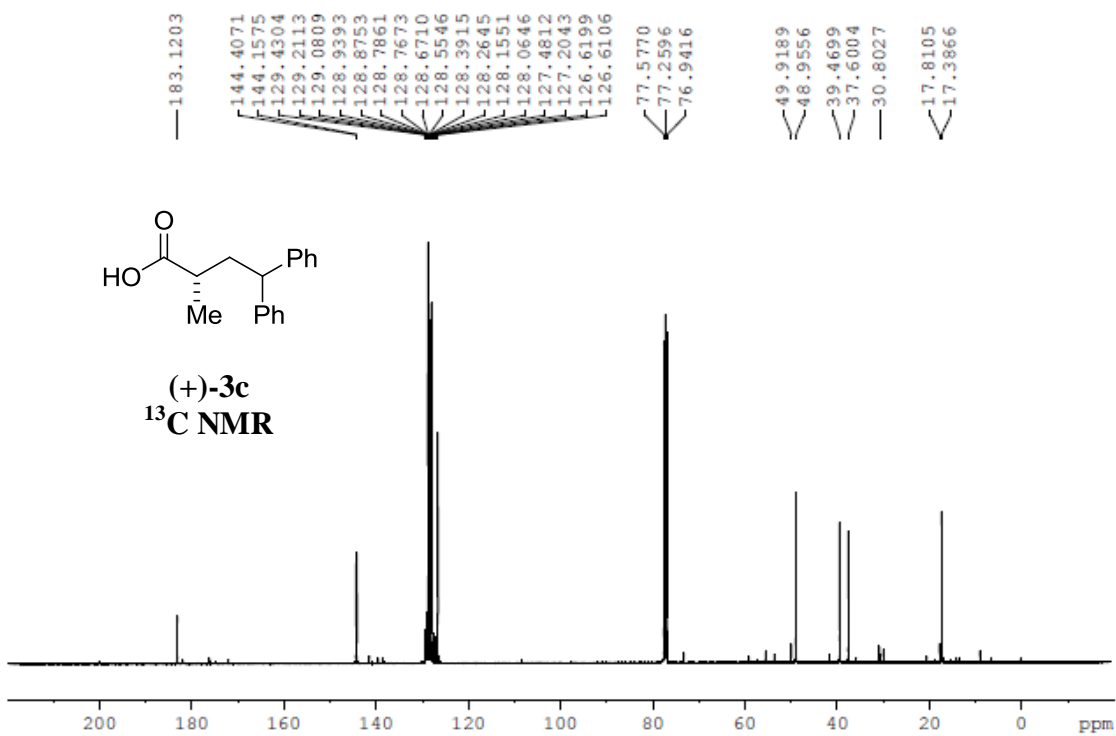

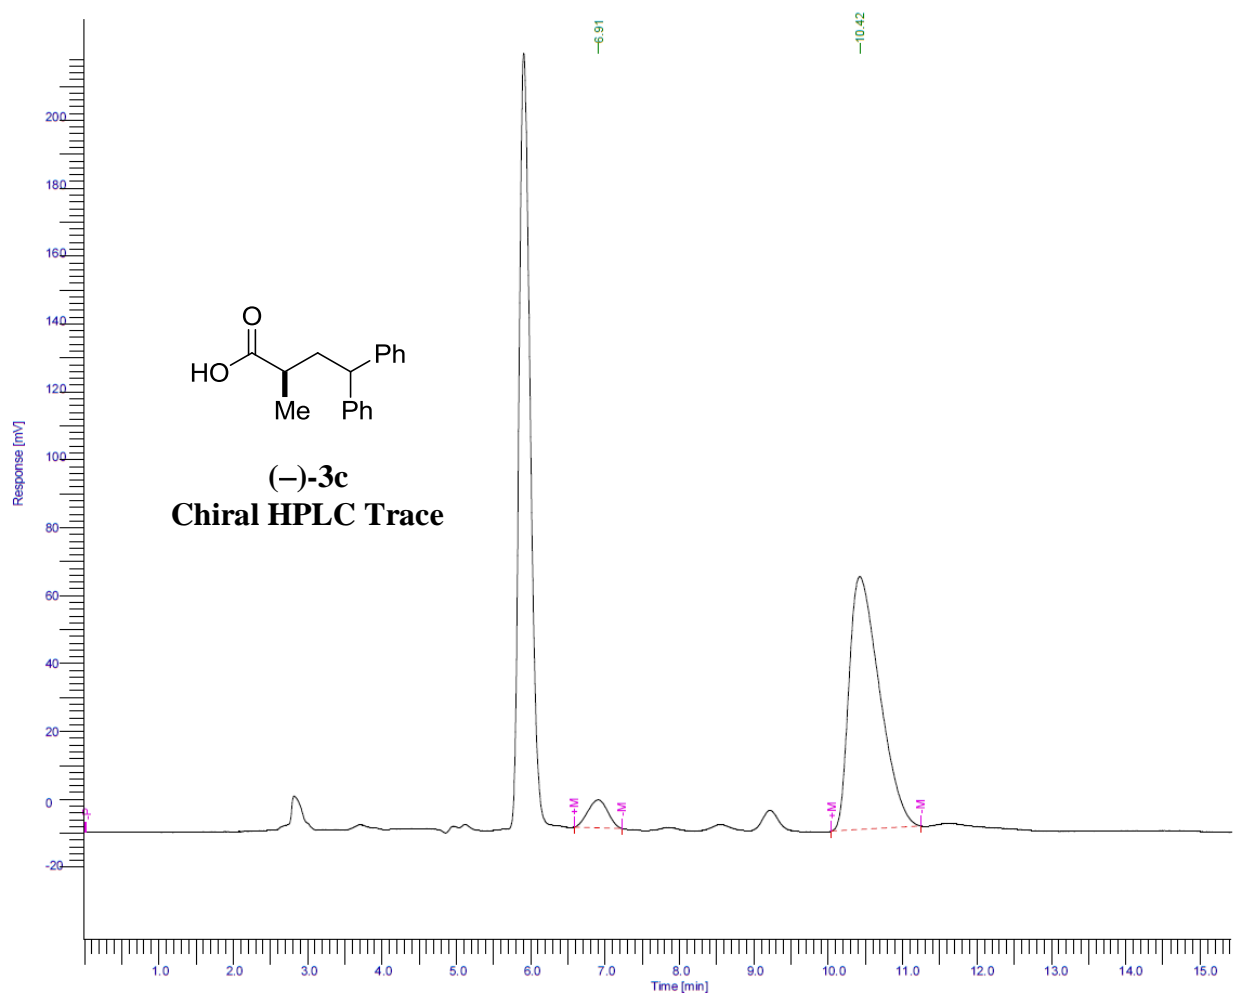

| Peak # | Time [min] | Area [ $\mu\text{V}\cdot\text{s}$ ] | Height [ $\mu\text{V}$ ] | Area [%] | Norm. Area [%] | BL  | Area/Height [s] |
|--------|------------|-------------------------------------|--------------------------|----------|----------------|-----|-----------------|
| 1      | 6.908      | 153218.60                           | 8247.67                  | 6.76     | 6.76           | *BB | 18.5772         |
| 2      | 10.424     | 2114518.87                          | 74468.19                 | 93.24    | 93.24          | *BB | 28.3949         |
|        |            | 2267737.48                          | 82715.86                 | 100.00   | 100.00         |     |                 |



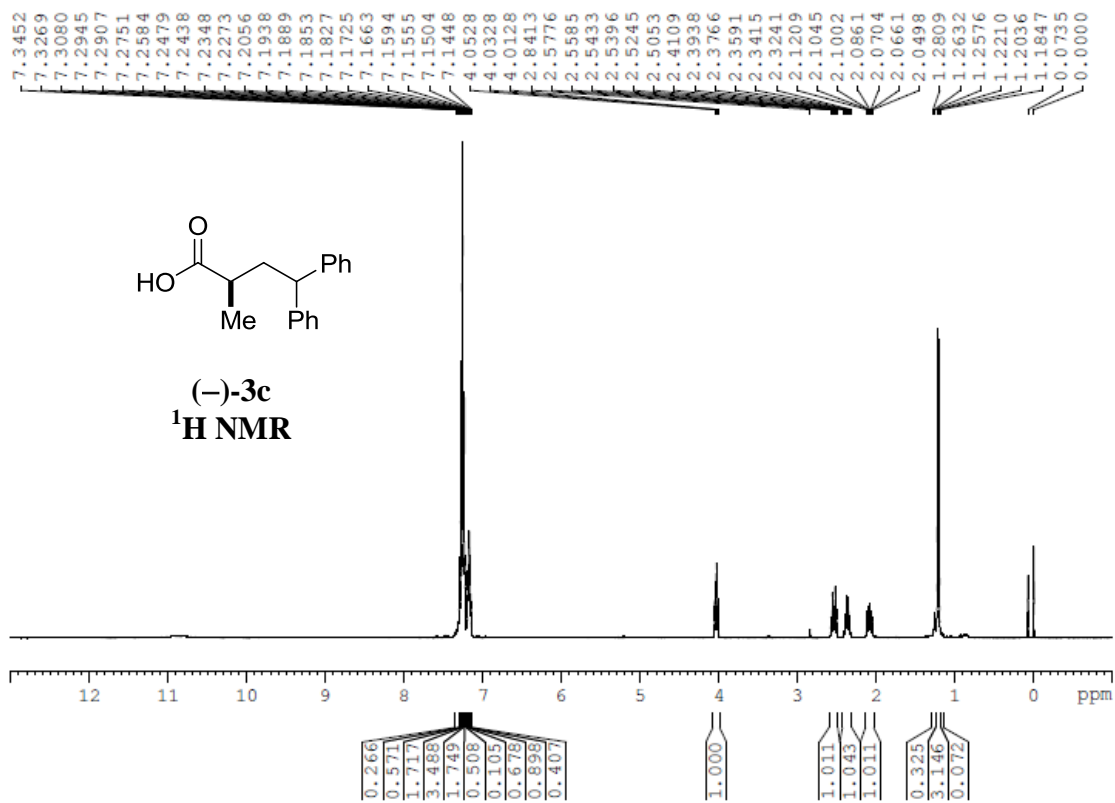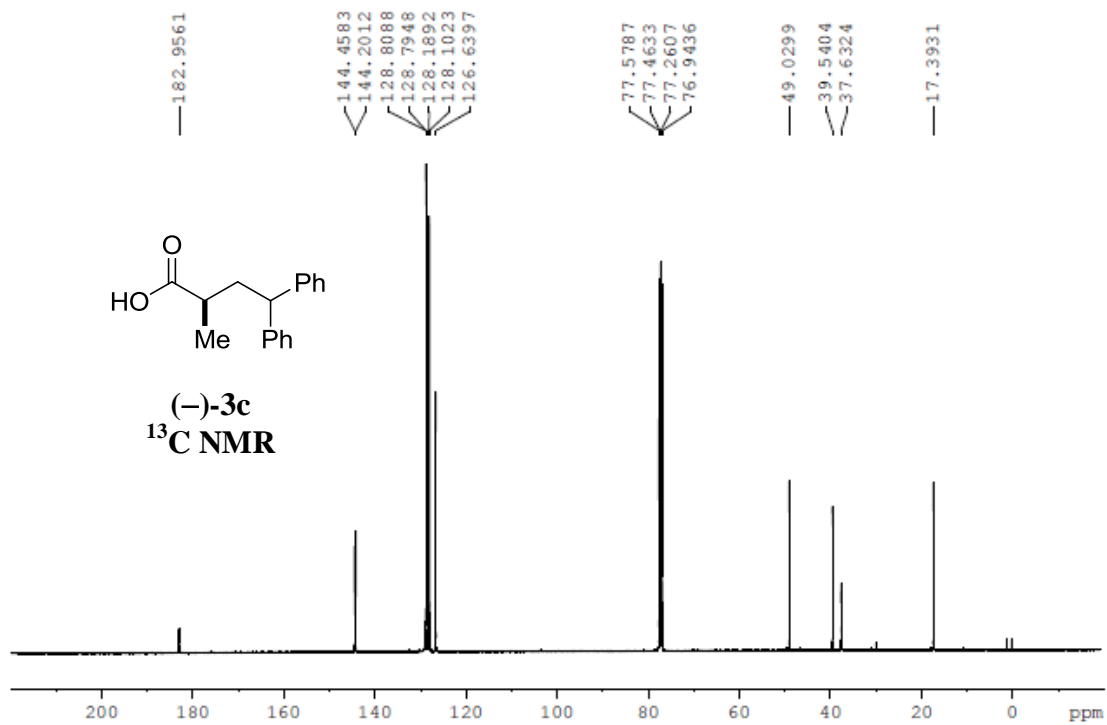

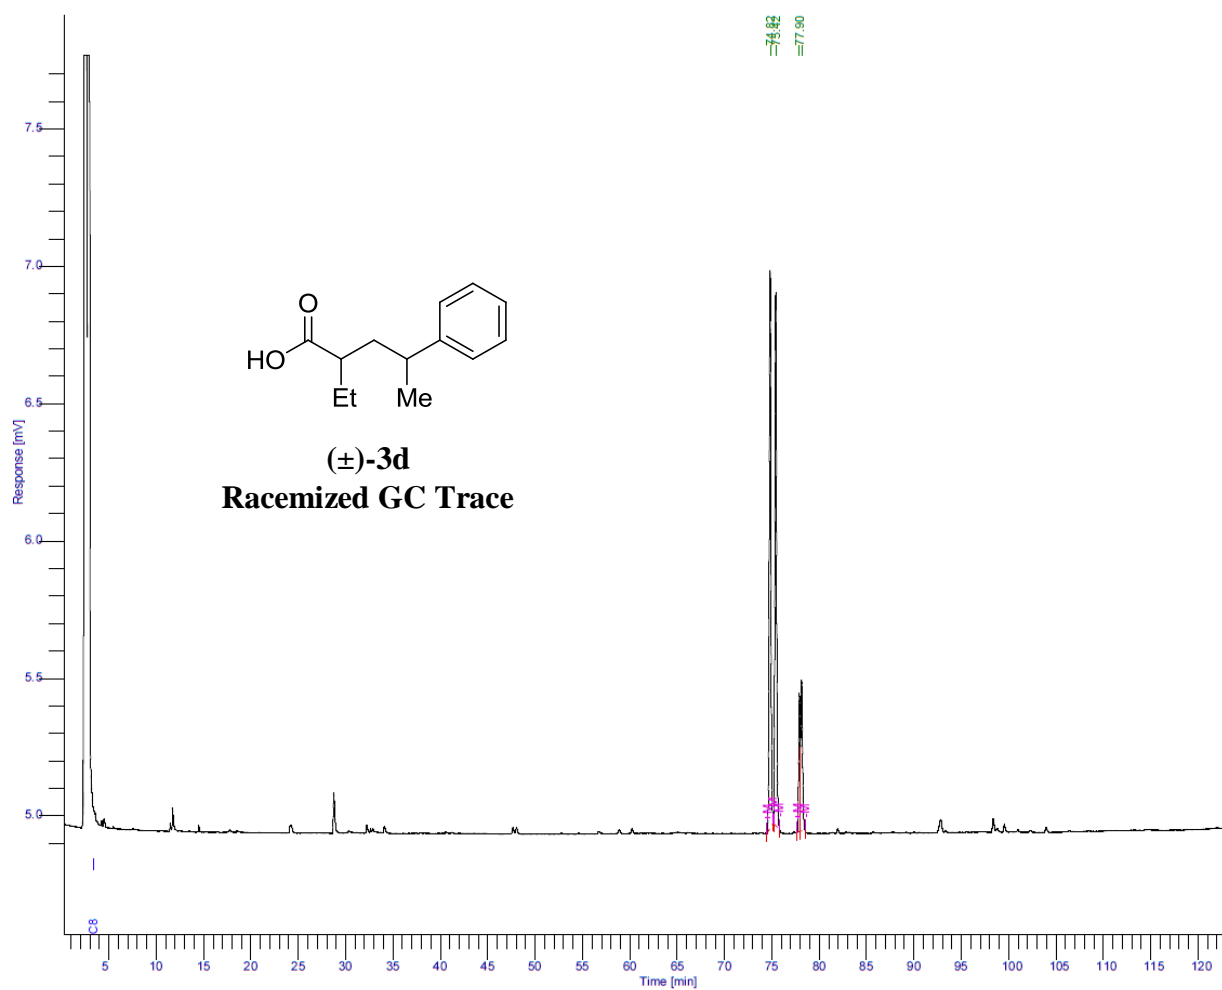

| Peak # | Component Name | Time [min] | Area [uV*sec] | Height [uV] | Area/Amount | Raw Amount |
|--------|----------------|------------|---------------|-------------|-------------|------------|
| 1      |                | 74.821     | 25338.85      | 2005.23     | -----       | -----      |
| 2      |                | 75.422     | 24233.47      | 1940.78     | 1.0000e+06  | 0.0242     |
| 3      |                | 77.901     | 5493.04       | 503.46      | 1.0000e+06  | 0.0055     |
| 4      |                | 78.144     | 6951.18       | 546.45      | 1.0000e+06  | 0.0070     |
|        |                |            | 62016.54      | 4995.92     | 3.0000e+06  | 0.0367     |

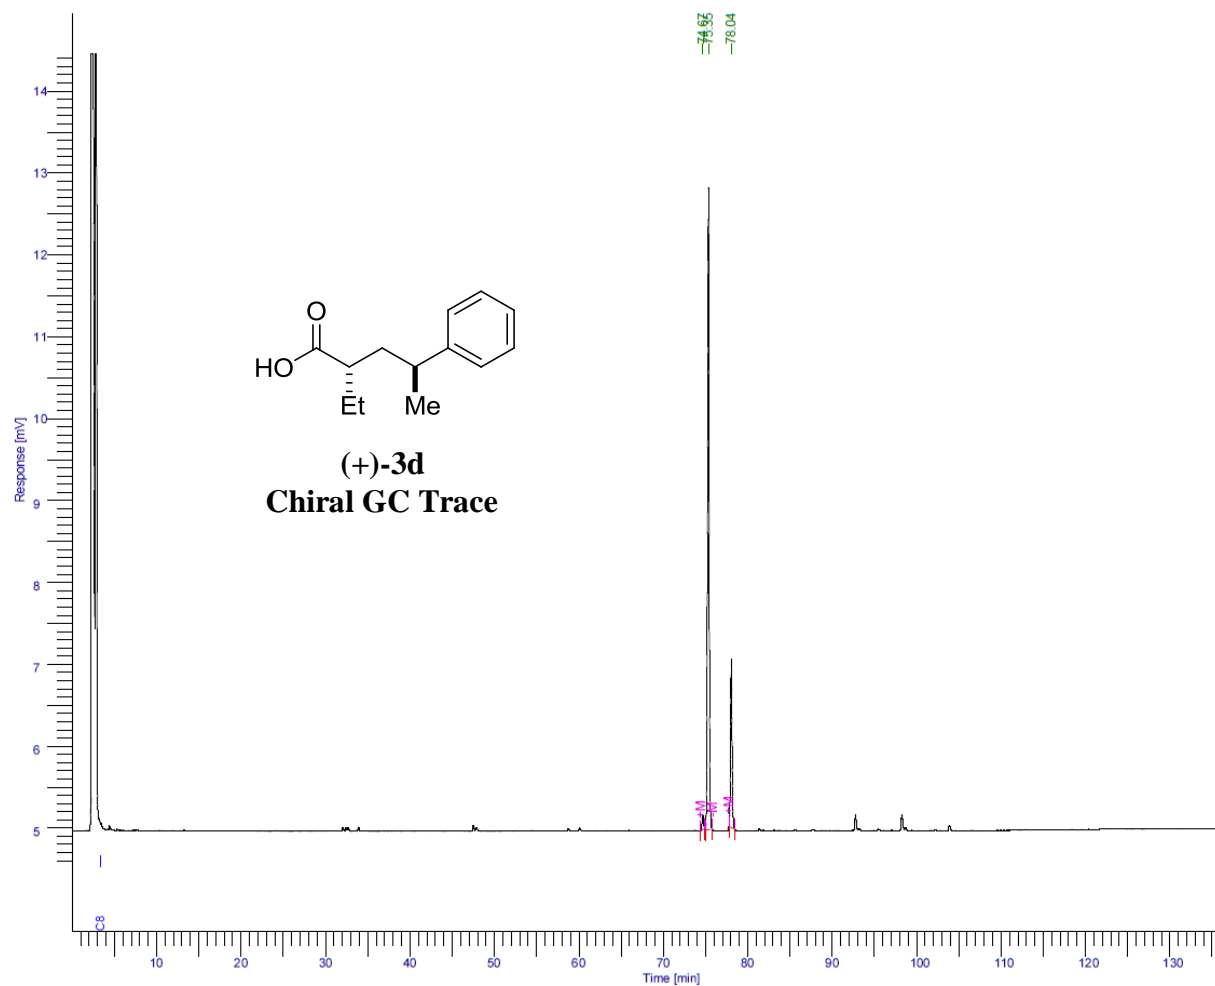

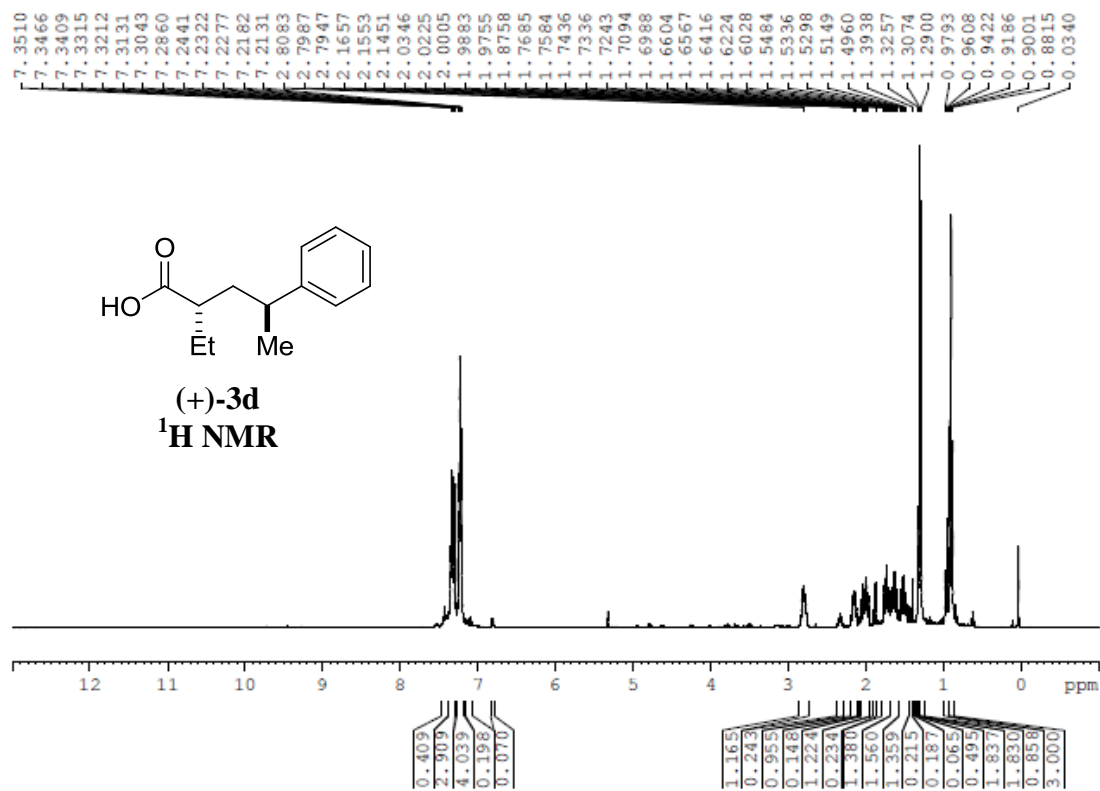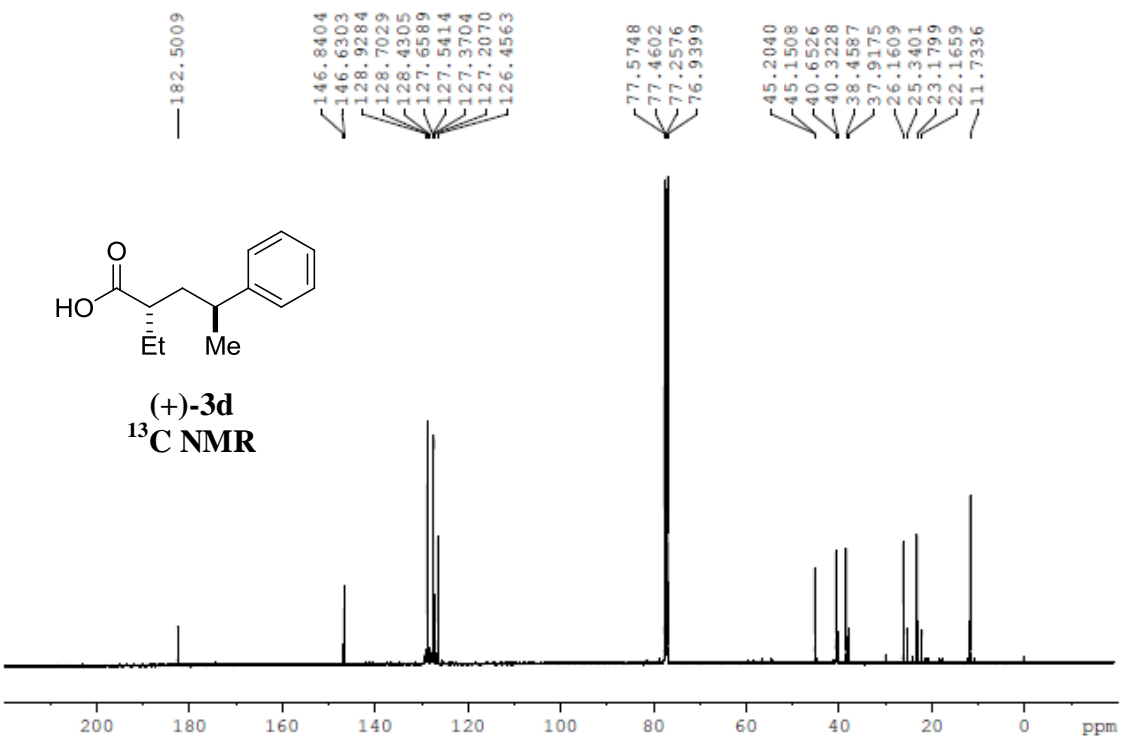

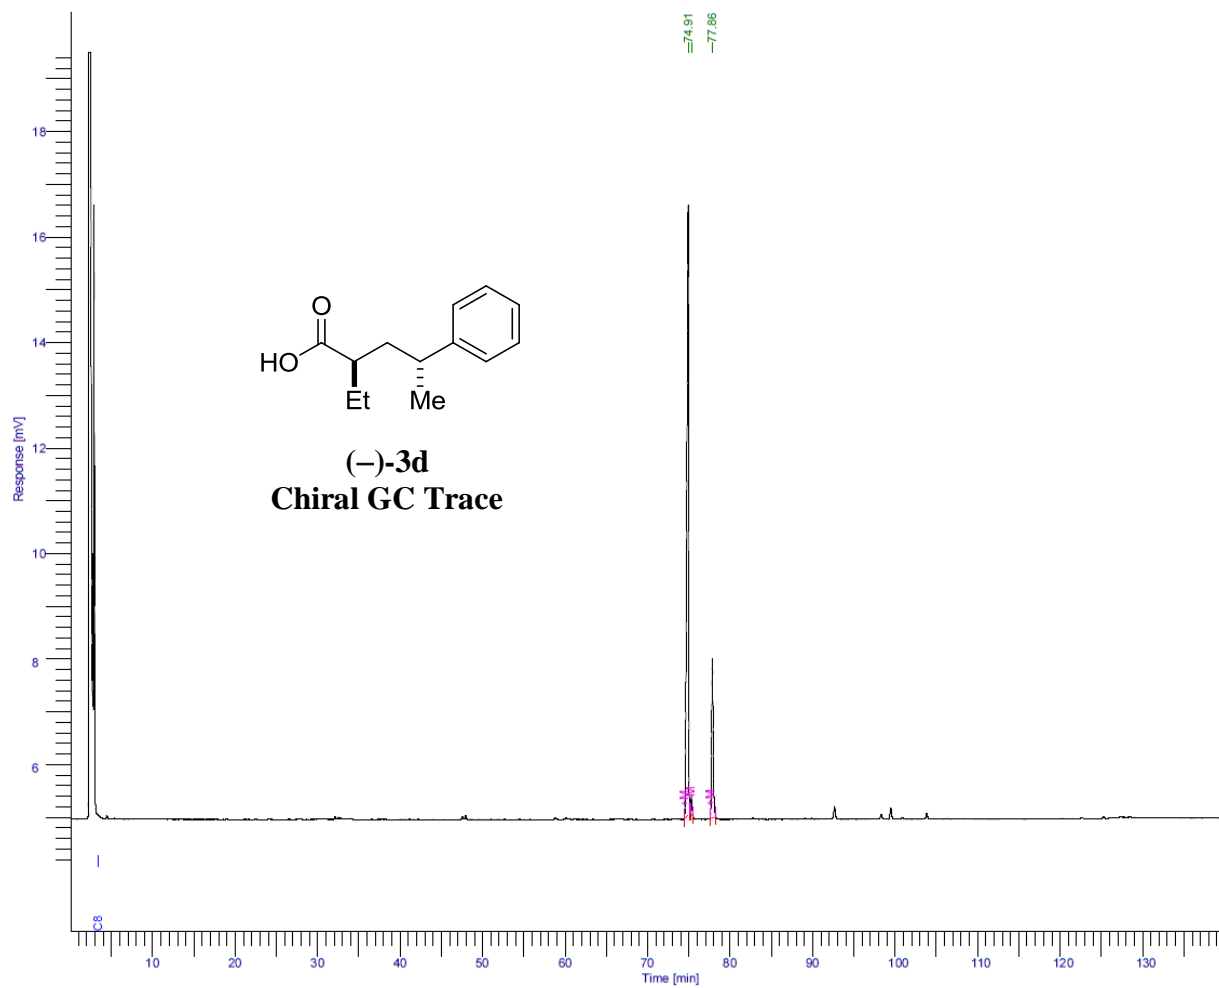

| Peak # | Component Name | Time [min] | Area [uV*sec] | Height [uV] | Area/Amount | Raw Amount |
|--------|----------------|------------|---------------|-------------|-------------|------------|
| 1      |                | 74.907     | 155051.20     | 11553.34    | -----       | -----      |
| 2      |                | 75.312     | 3604.01       | 353.49      | 1.0000e+06  | 0.0036     |
| 3      |                | 77.858     | 37885.79      | 2993.85     | 1.0000e+06  | 0.0379     |
|        |                |            | 196540.99     | 14900.68    | 2.0000e+06  | 0.0415     |

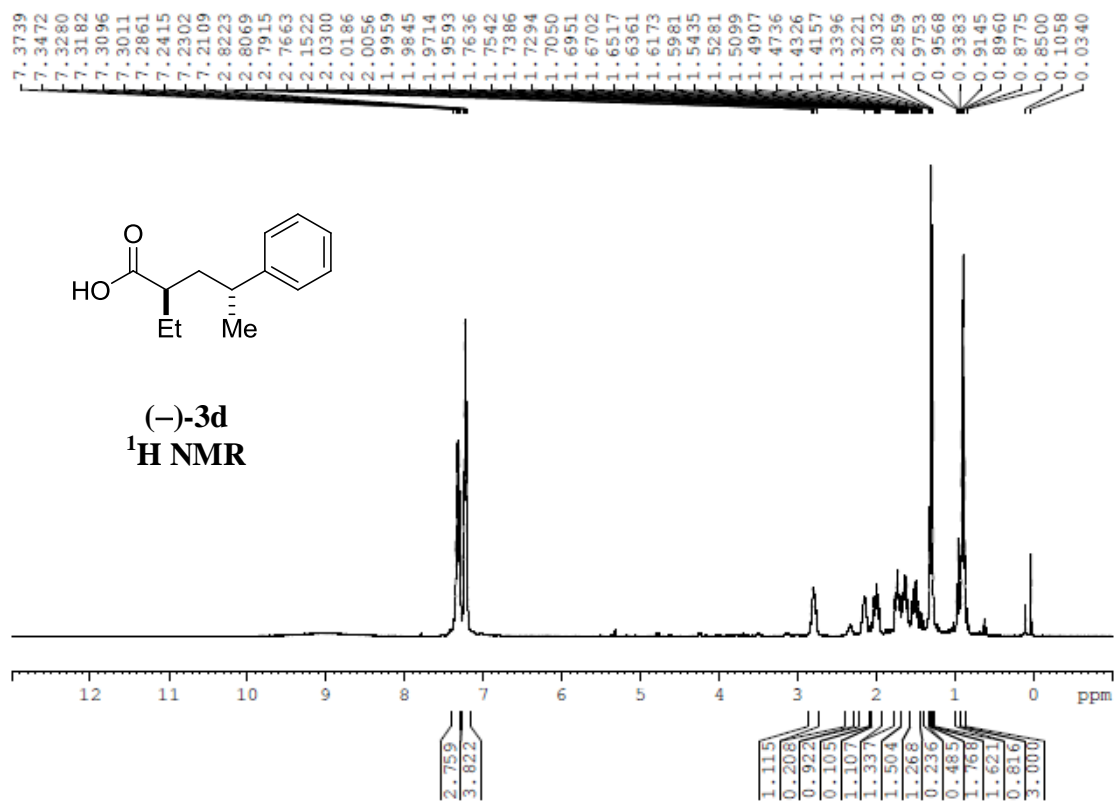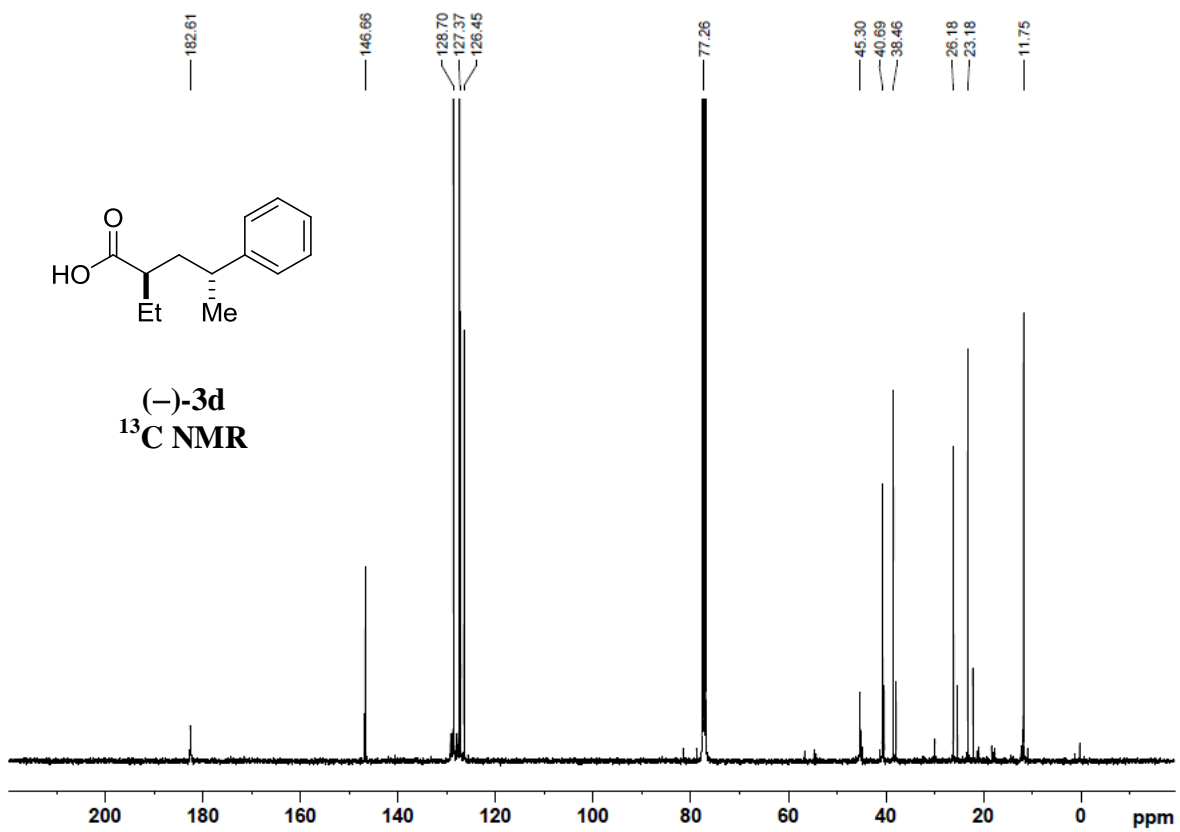

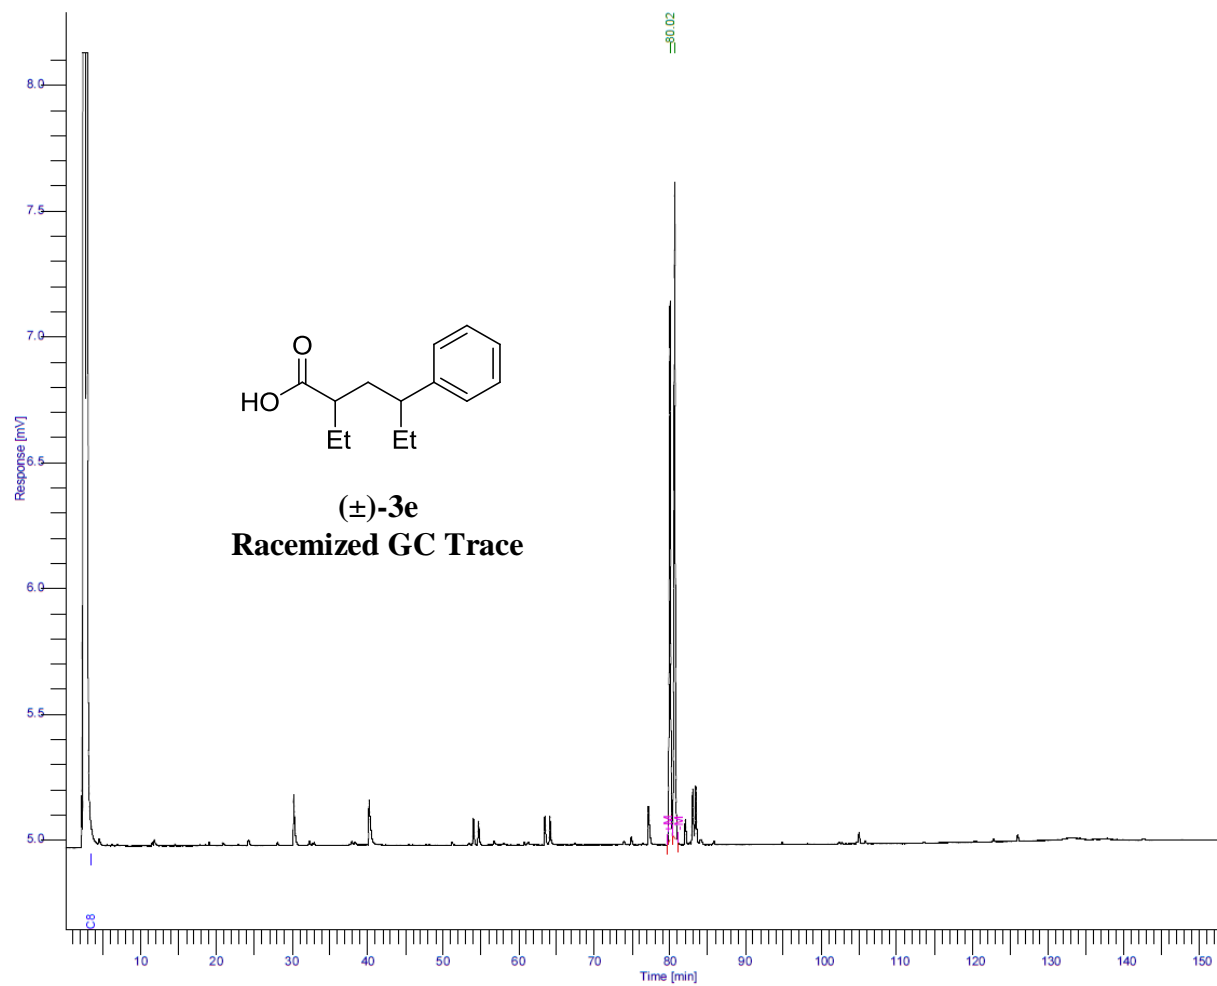

| Peak # | Component Name | Time [min] | Area [uV*sec] | Height [uV] | Area/Amount | Raw Amount |
|--------|----------------|------------|---------------|-------------|-------------|------------|
| 1      |                | 80.016     | 26620.25      | 2141.17     | -----       | -----      |
| 2      |                | 80.630     | 32315.13      | 2599.14     | 1.0000e+06  | 0.0323     |
|        |                |            | 58935.38      | 4740.31     | 1.0000e+06  | 0.0323     |

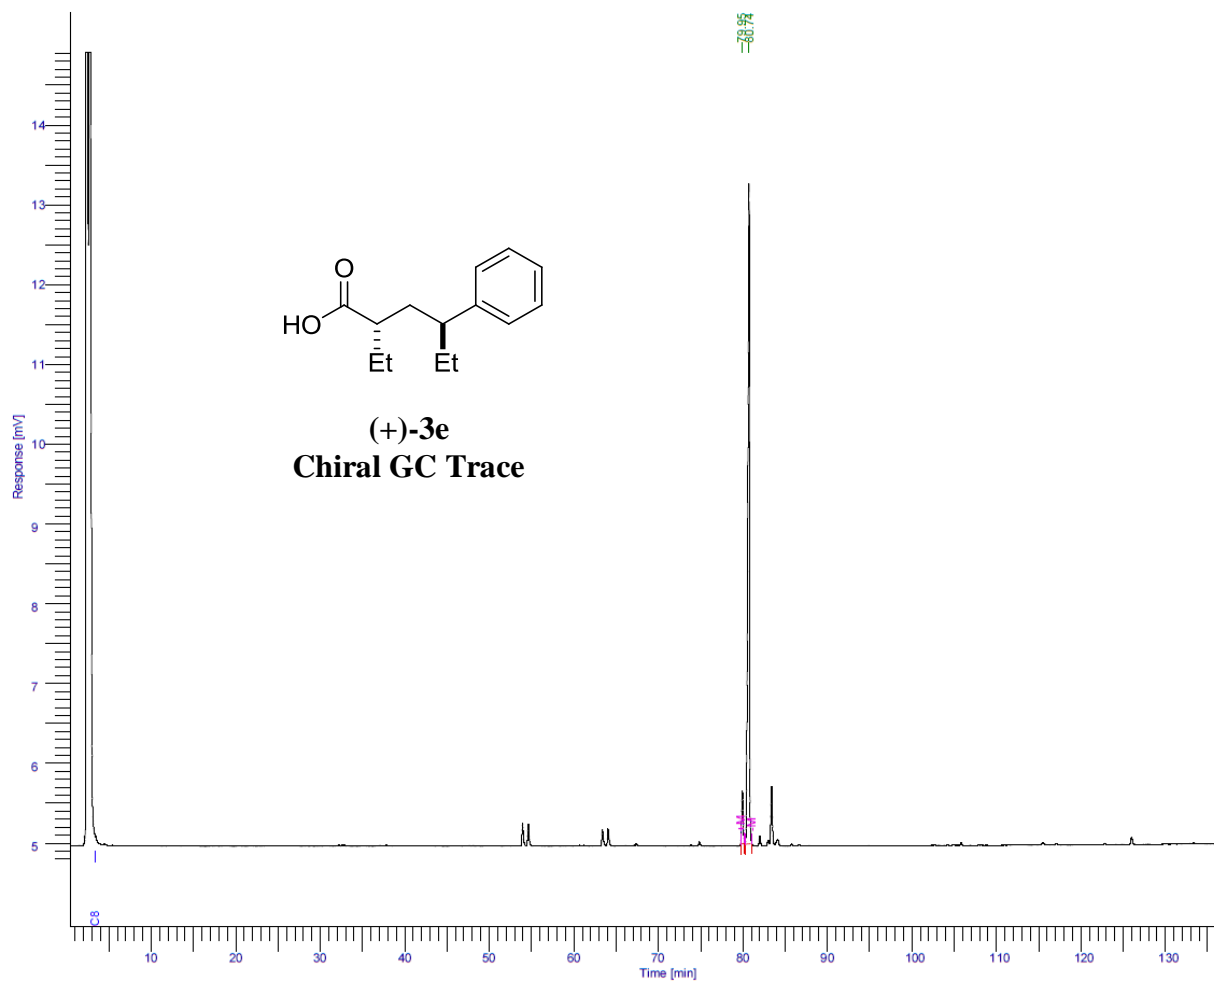

| Peak # | Component Name | Time [min] | Area [uV*sec] | Height [uV] | Area/Amount | Raw Amount |
|--------|----------------|------------|---------------|-------------|-------------|------------|
| 1      |                | 79.947     | 8008.82       | 658.42      | -----       | -----      |
| 2      |                | 80.735     | 110535.93     | 8274.76     | 1.0000e+06  | 0.1105     |
|        |                |            | 118544.74     | 8933.18     | 1.0000e+06  | 0.1105     |



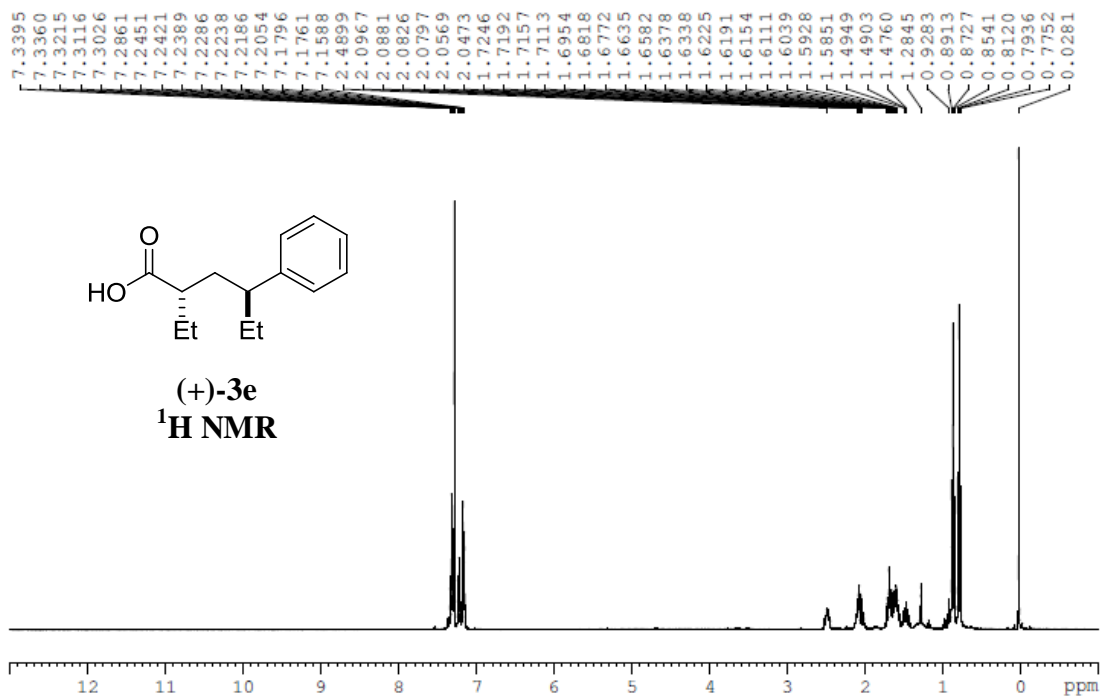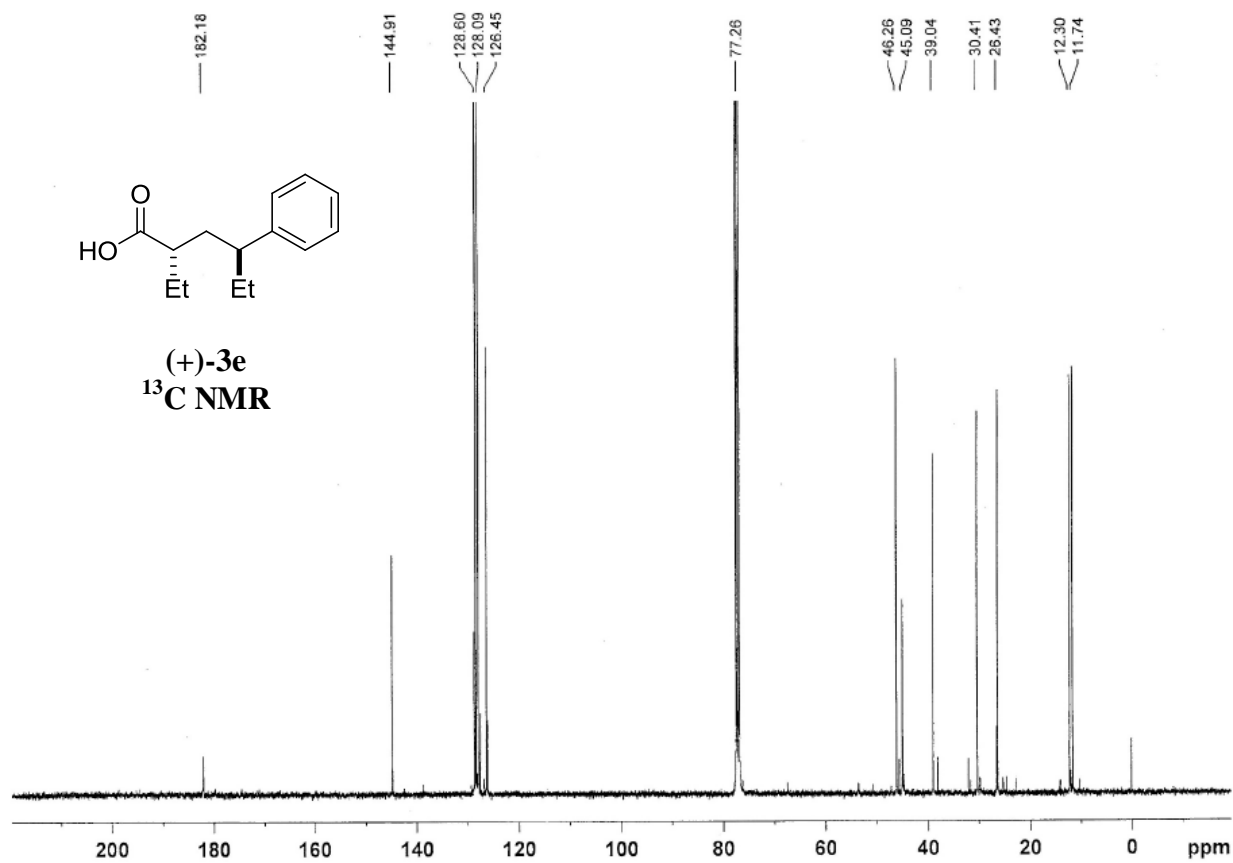

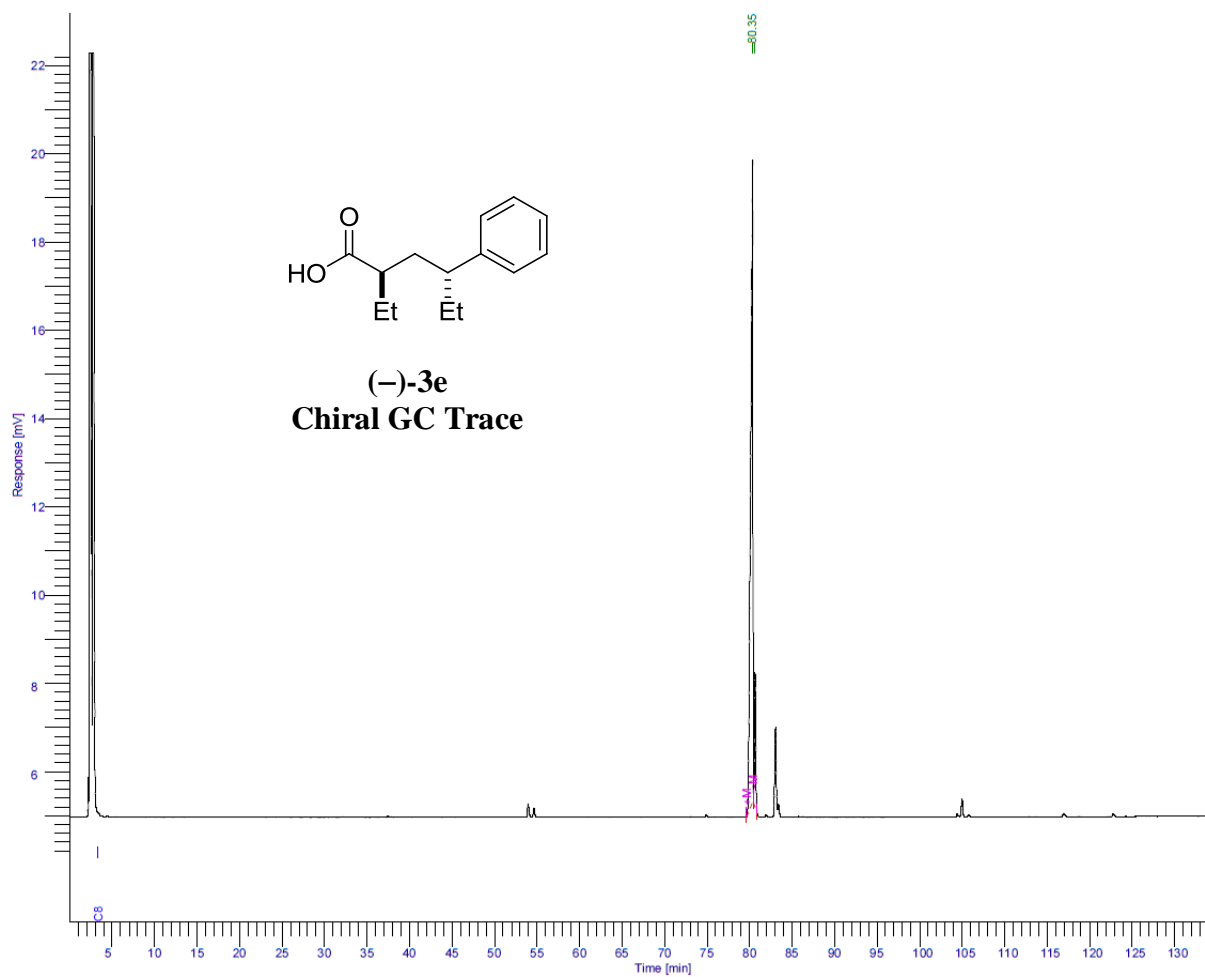

| Peak # | Component Name | Time [min] | Area [uV*sec] | Height [uV] | Area/ Amount | Raw Amount |
|--------|----------------|------------|---------------|-------------|--------------|------------|
| 1      |                | 80.352     | 253358.70     | 14554.58    | -----        | -----      |
| 2      |                | 80.660     | 31291.65      | 3032.33     | 1.0000e+06   | 0.0313     |
|        |                |            | 284650.35     | 17586.91    | 1.0000e+06   | 0.0313     |

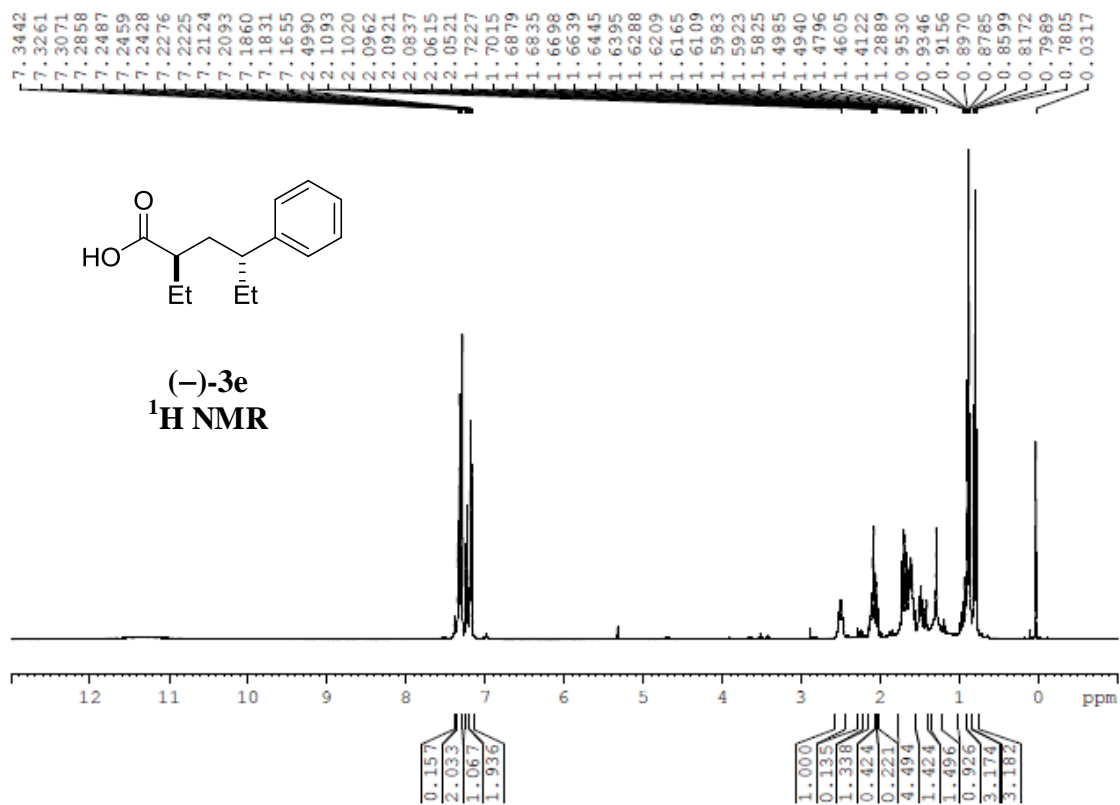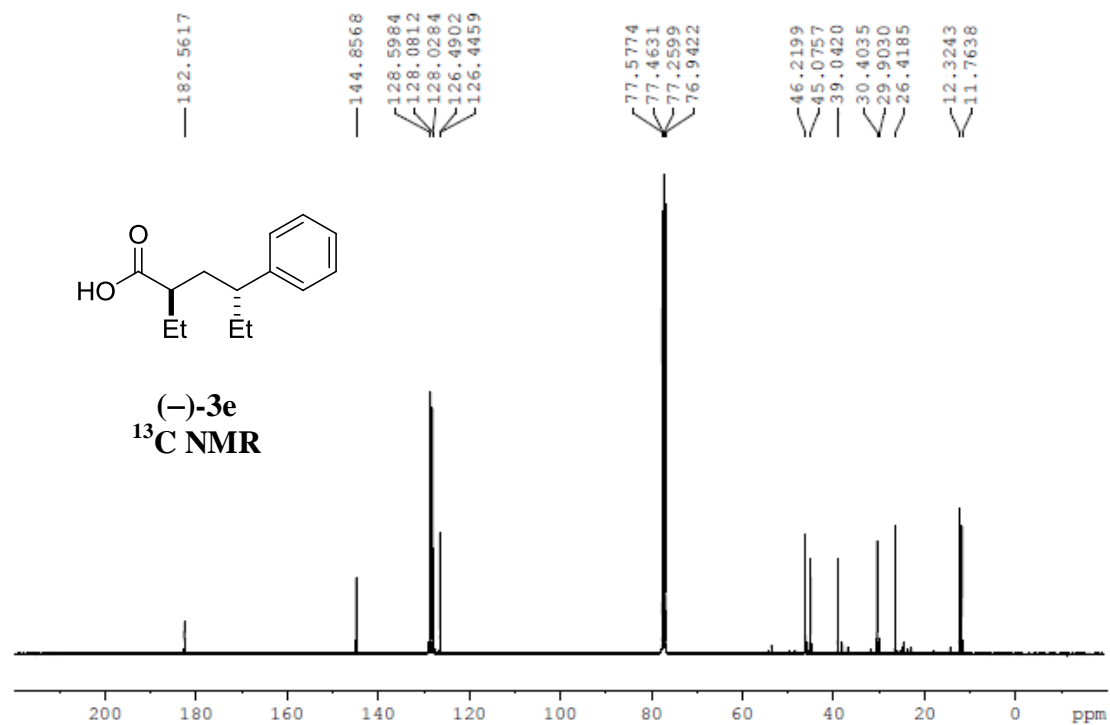

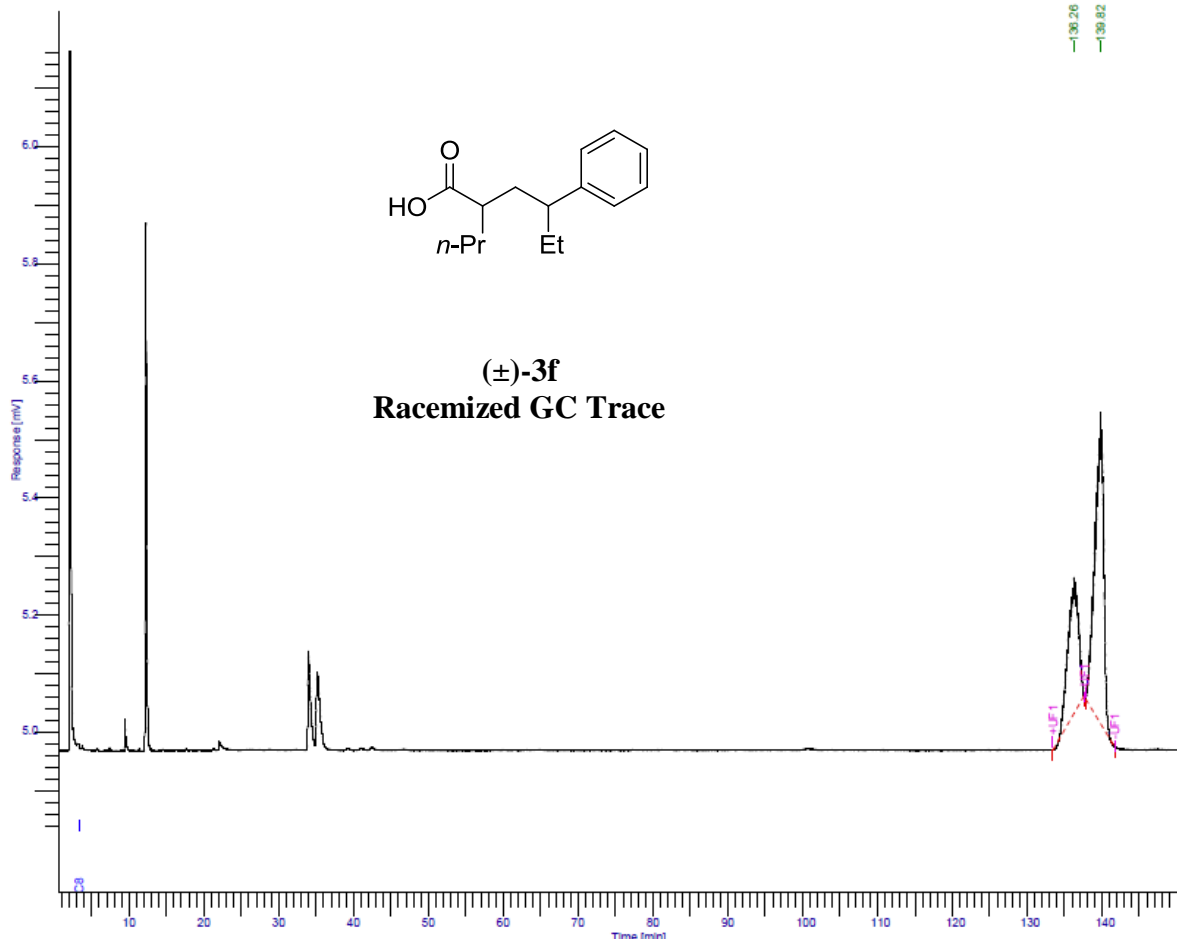

| Peak # | Component Name | Time [min] | Area [uV*sec] | Height [uV] | Area/Amount | Raw Amount |
|--------|----------------|------------|---------------|-------------|-------------|------------|
| 1      |                | 136.261    | 21878.41      | 231.73      | -----       | -----      |
| 2      |                | 139.824    | 41686.81      | 530.19      | 1.0000e+06  | 0.0417     |
|        |                |            | 63565.22      | 761.92      | 1.0000e+06  | 0.0417     |

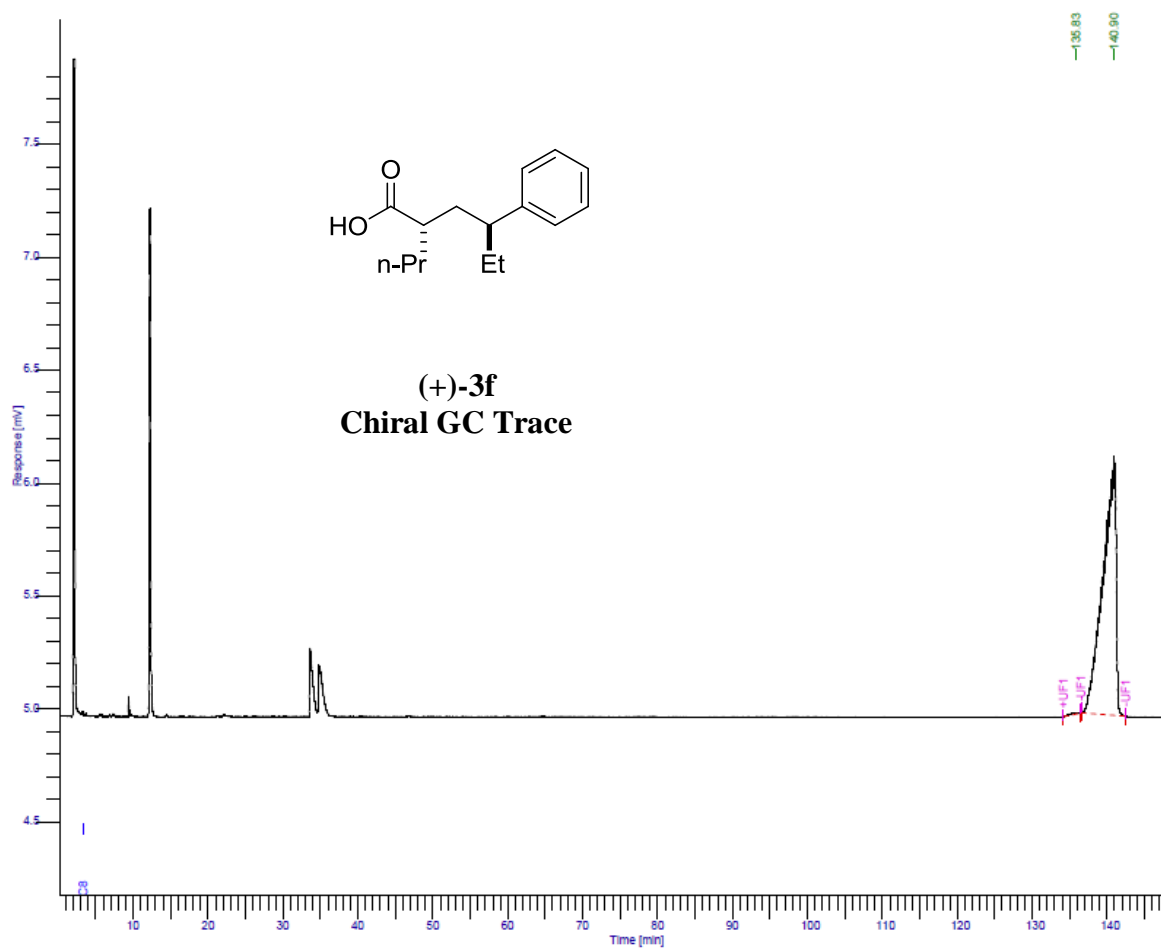

| Peak # | Component Name | Time [min] | Area [uV*sec] | Height [uV] | Area/Amount | Raw Amount |
|--------|----------------|------------|---------------|-------------|-------------|------------|
| 1      |                | 135.835    | 488.12        | 6.36        | -----       | -----      |
| 2      |                | 140.896    | 135596.74     | 1145.43     | 1.0000e+06  | 0.1356     |
|        |                |            | 136084.87     | 1151.78     | 1.0000e+06  | 0.1356     |

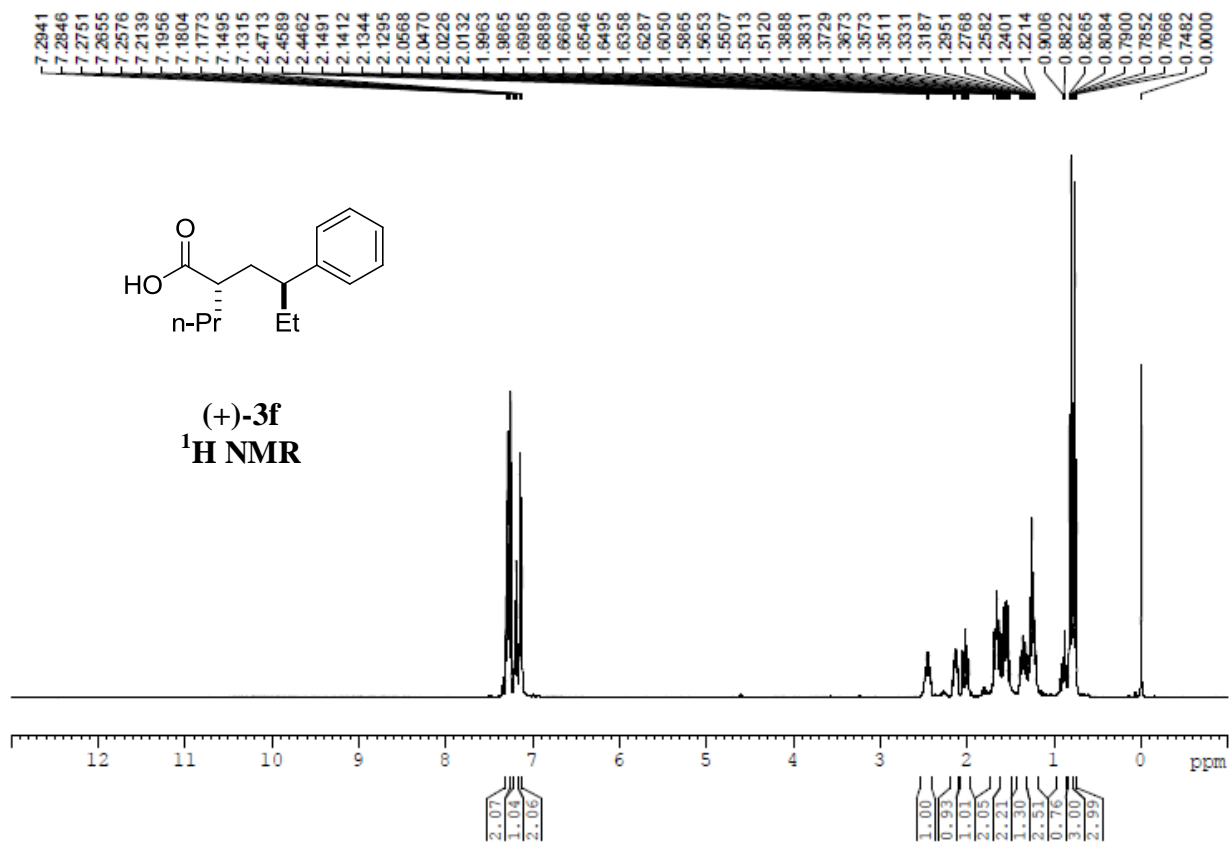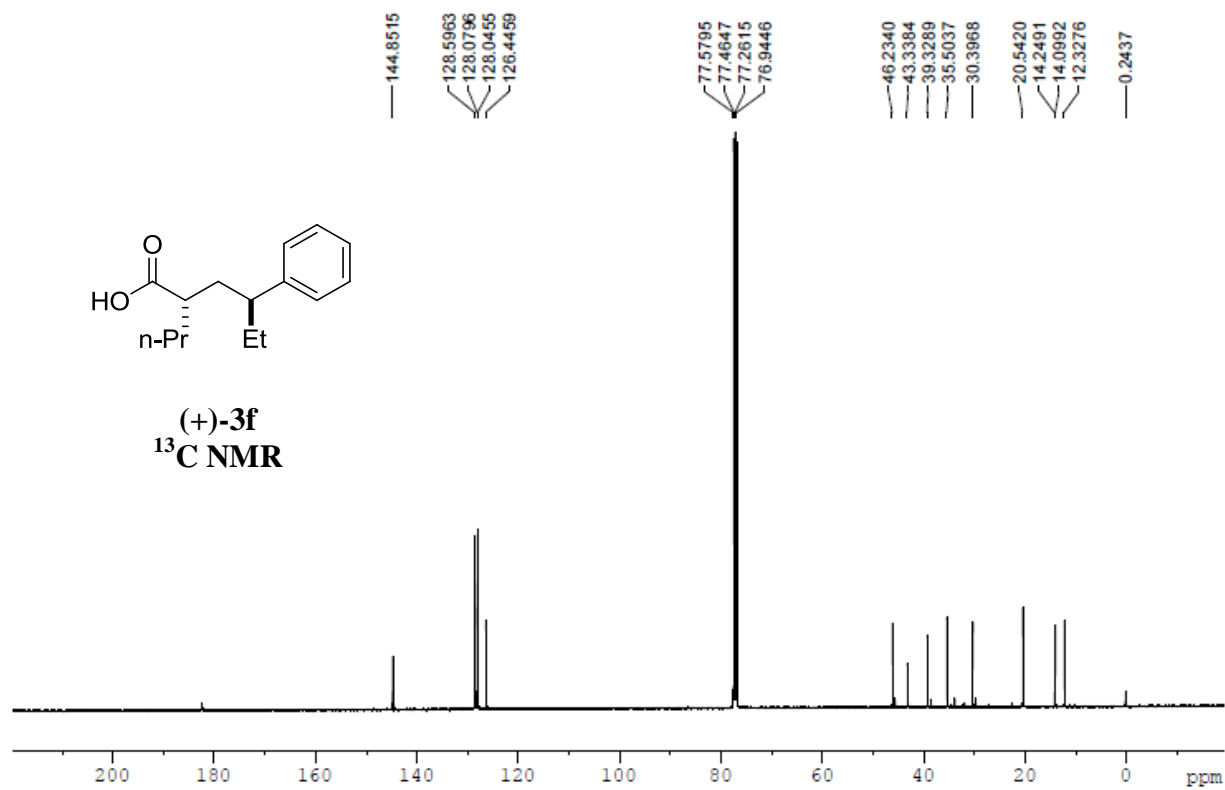

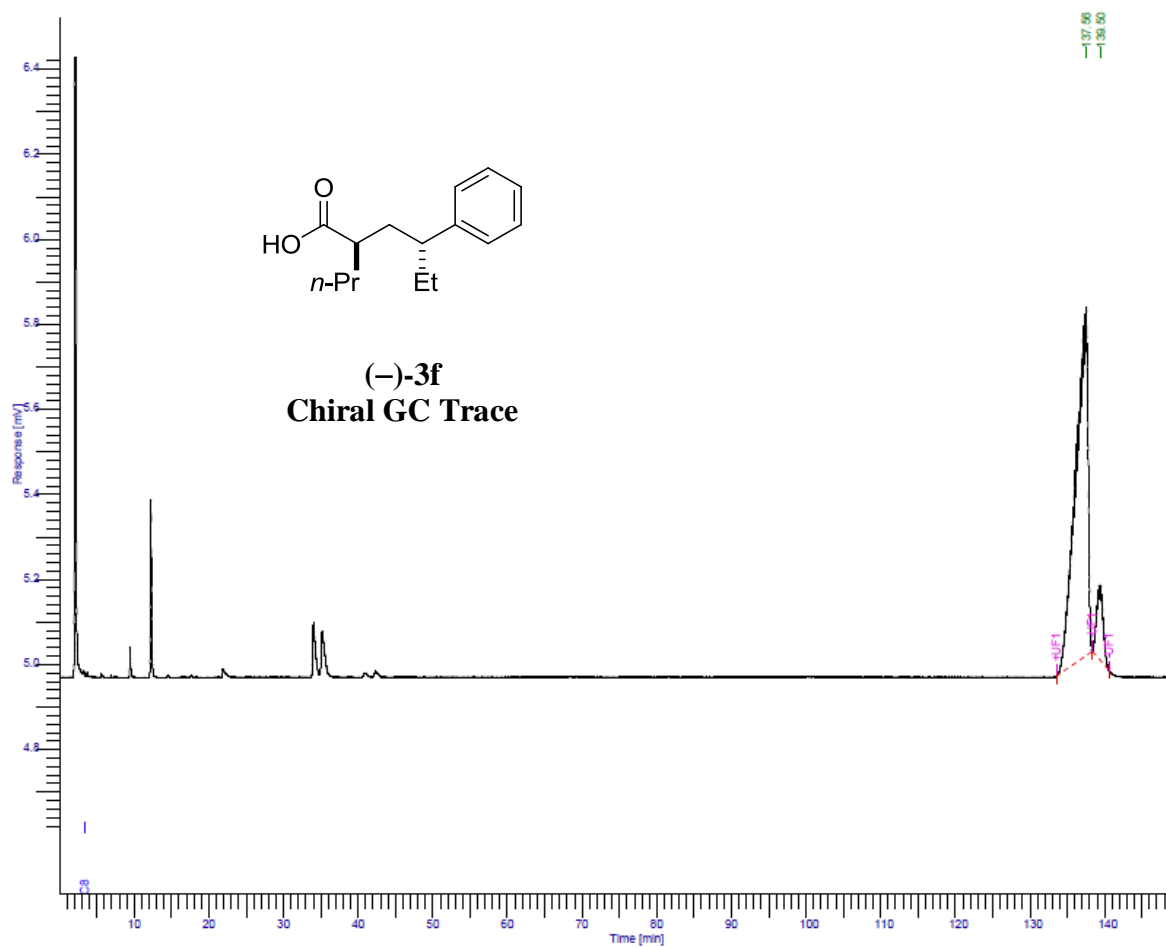

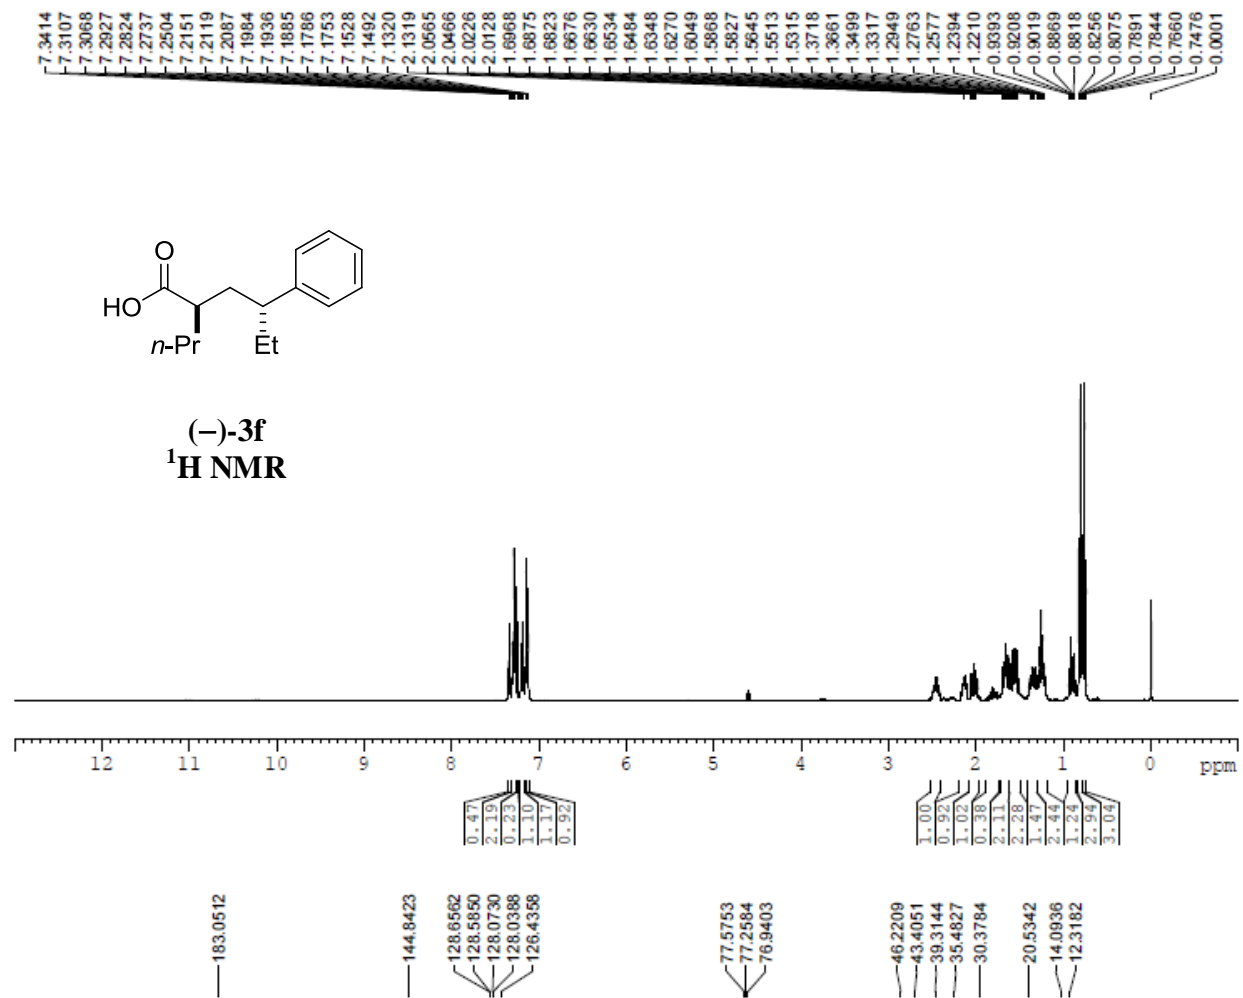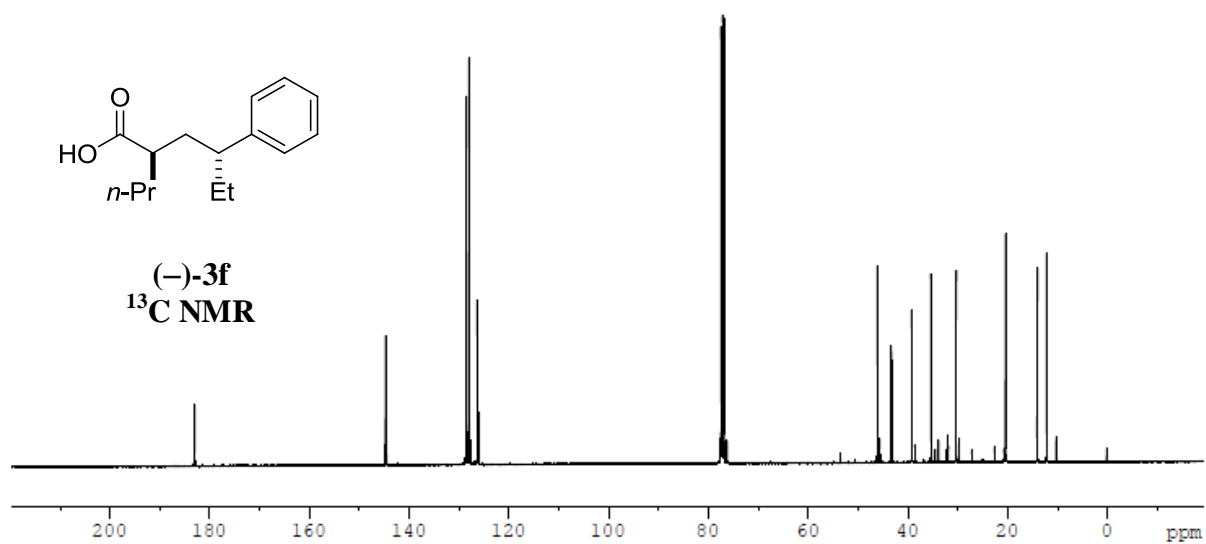



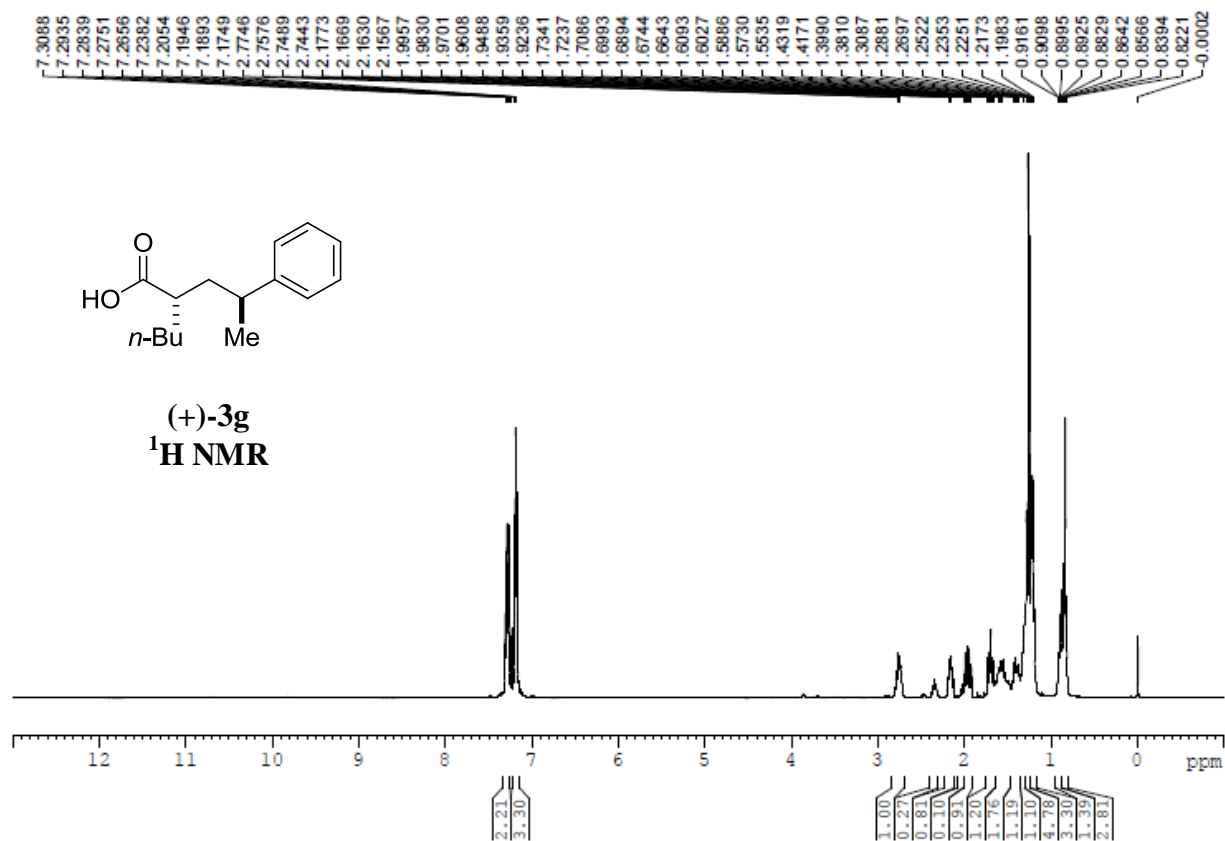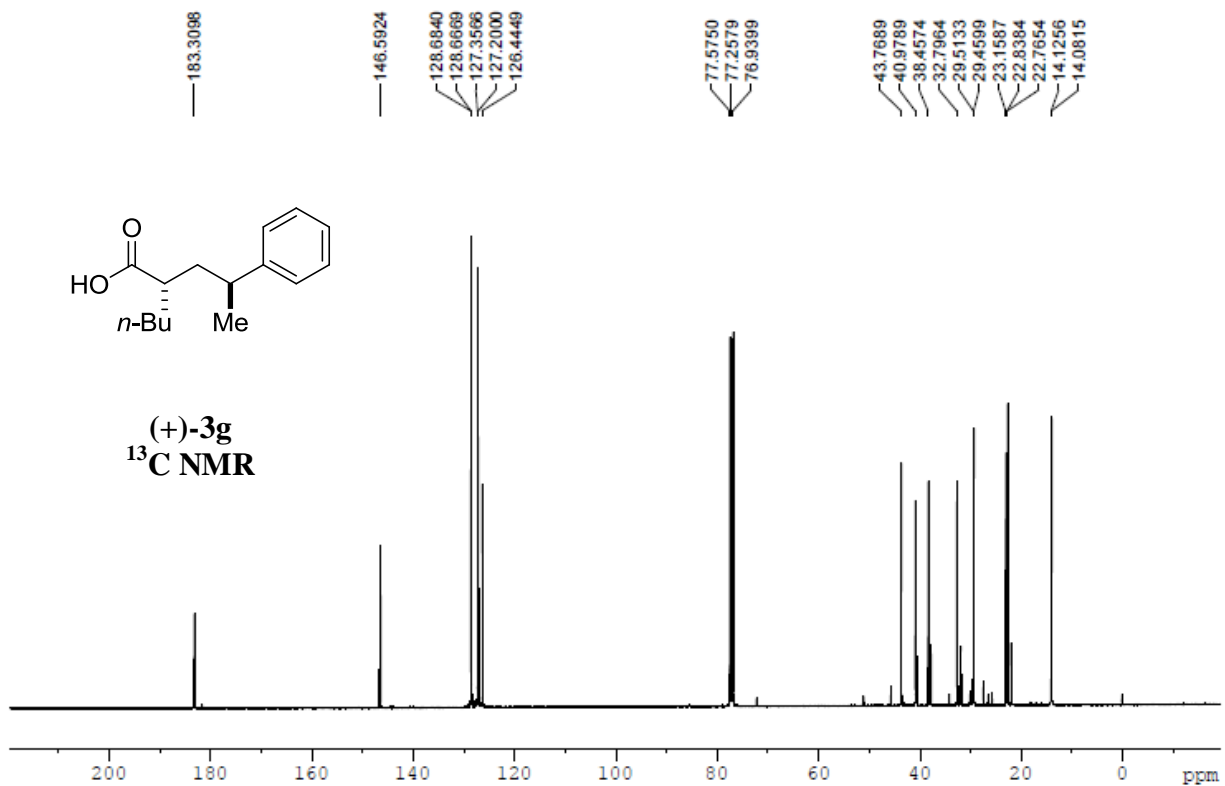

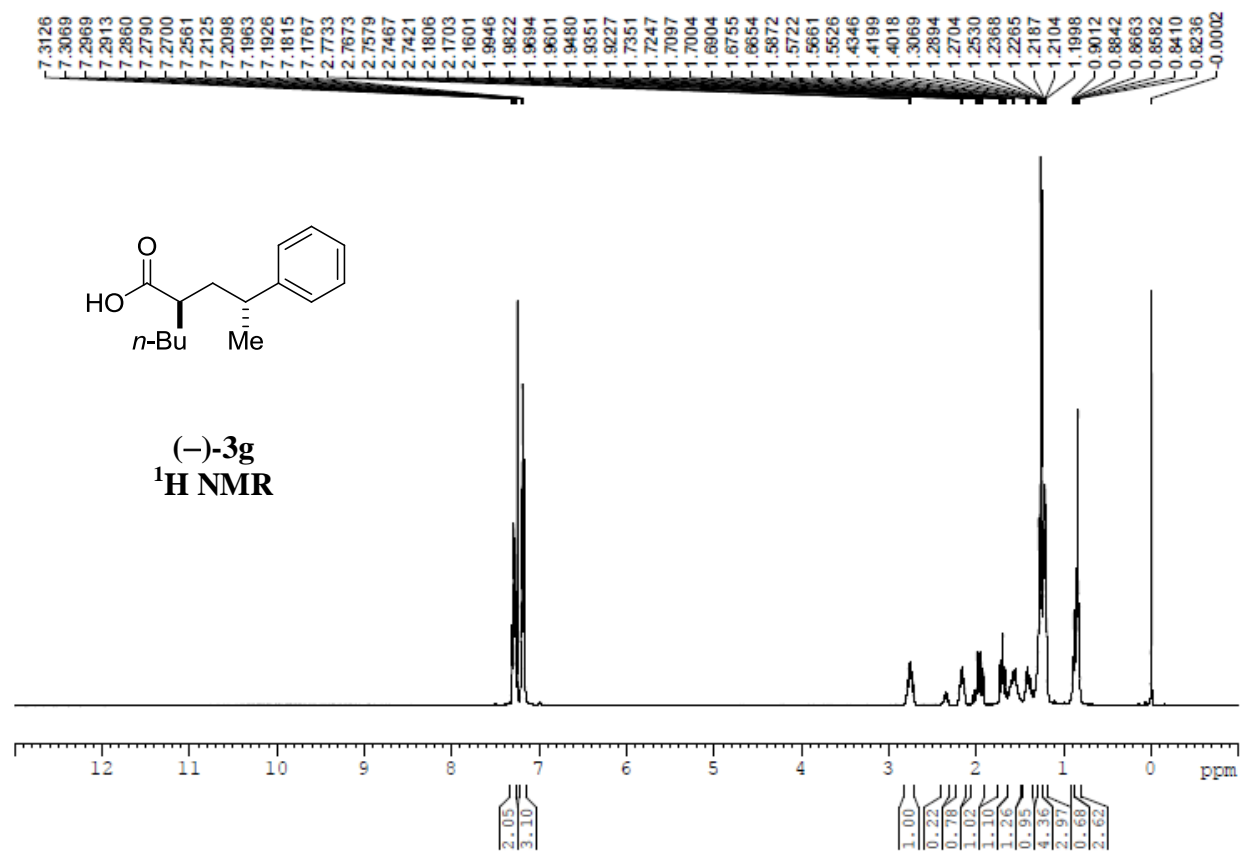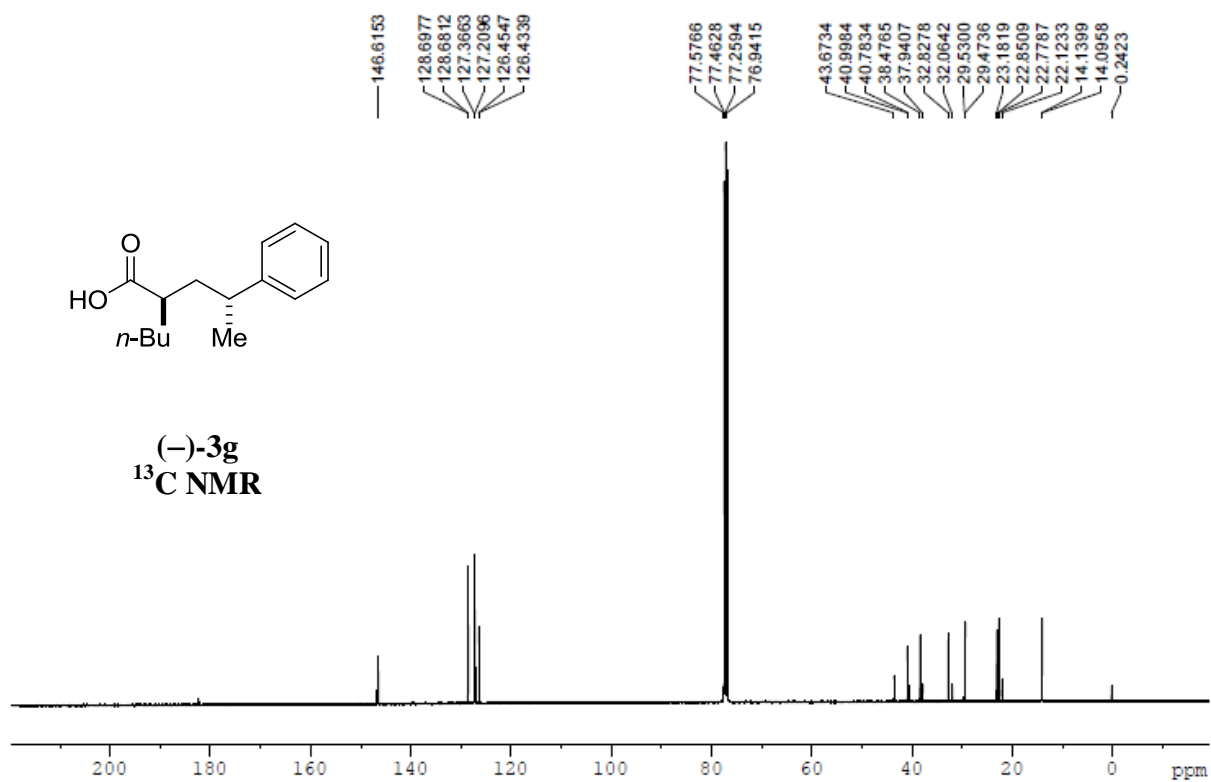

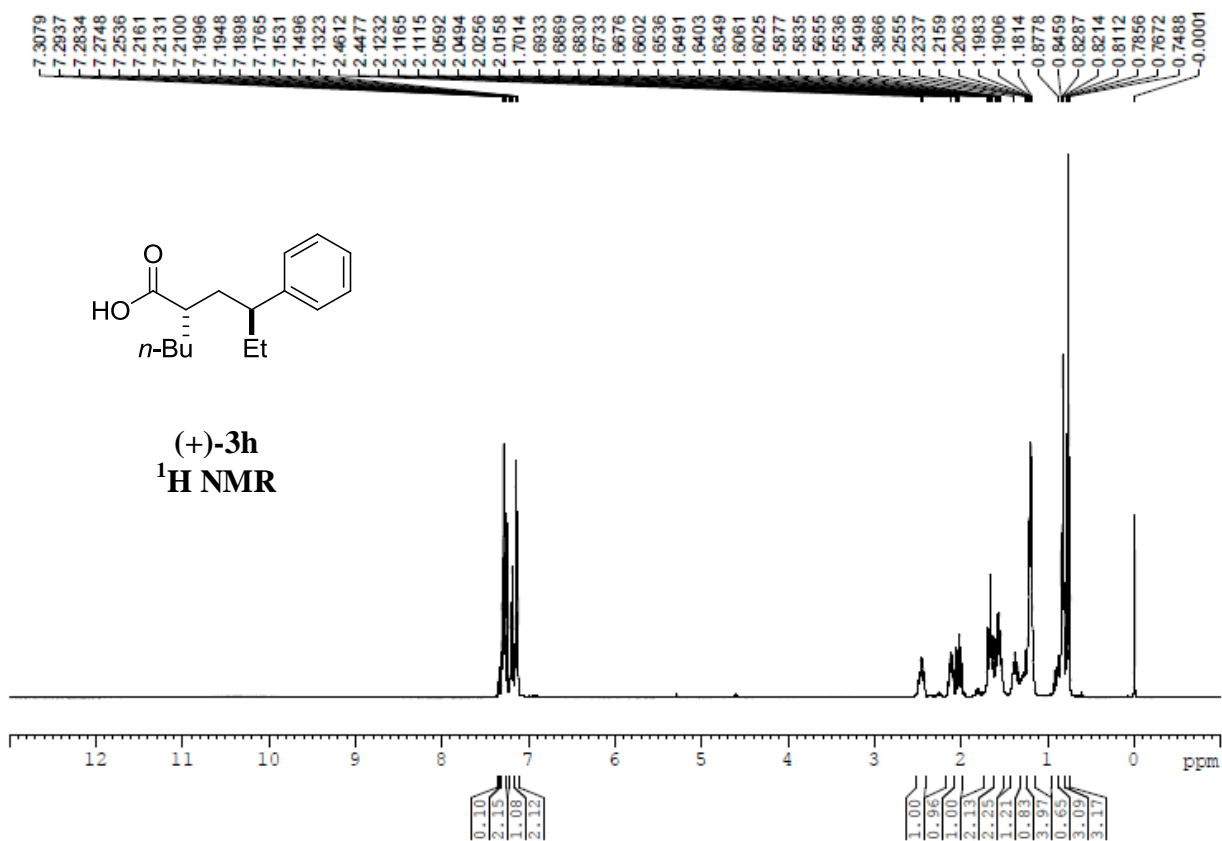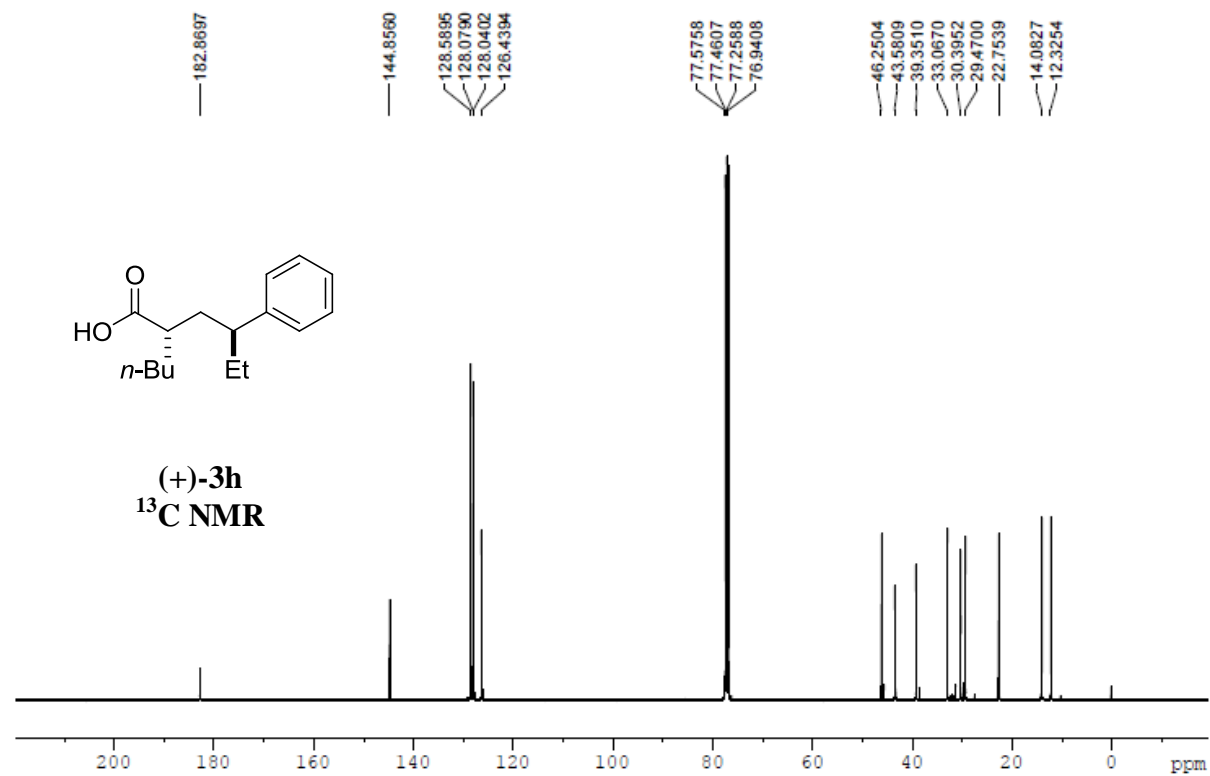

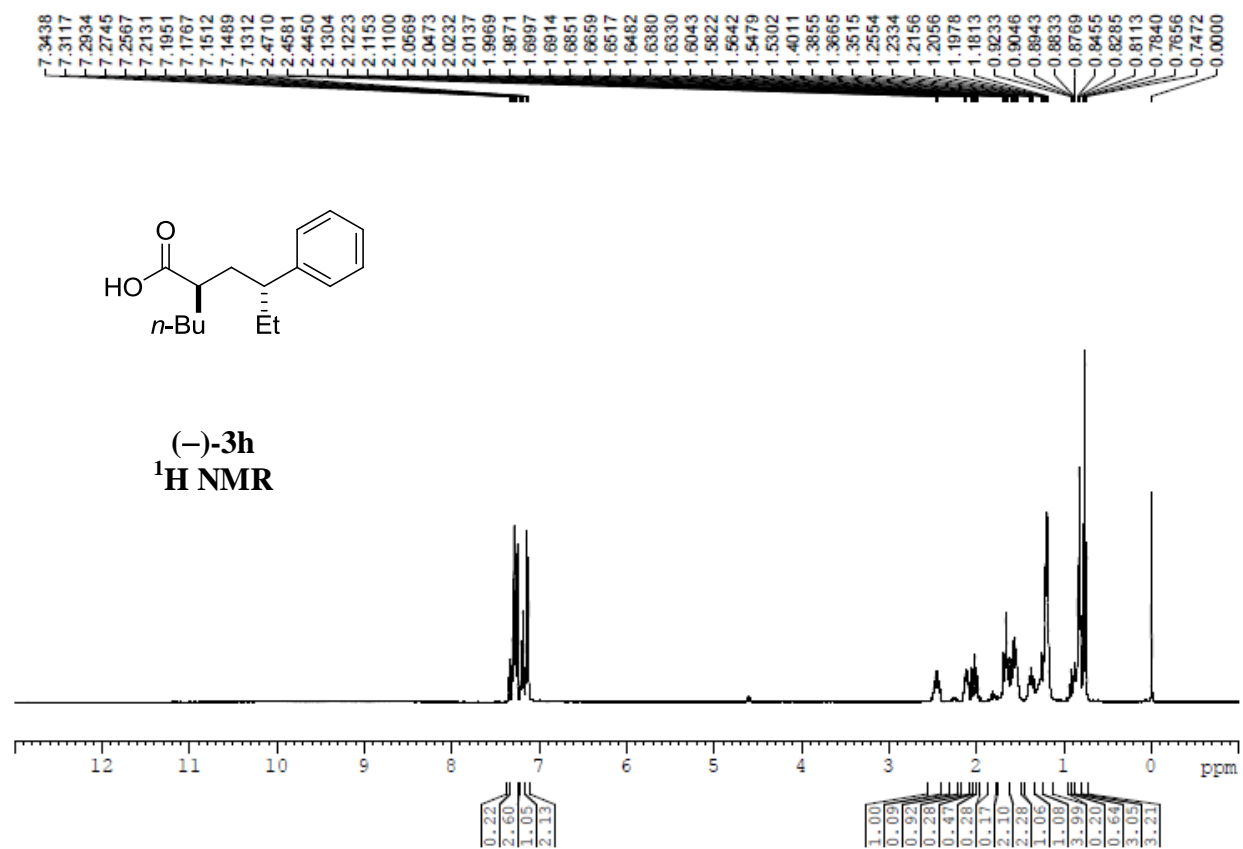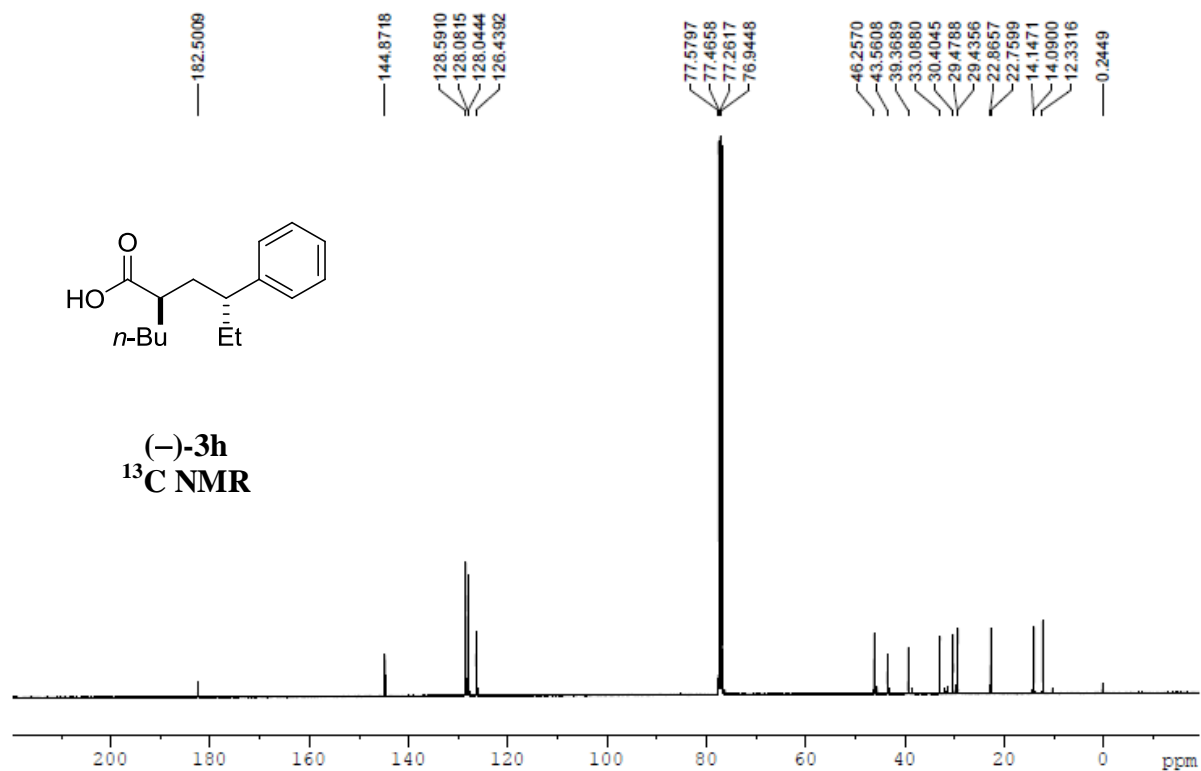

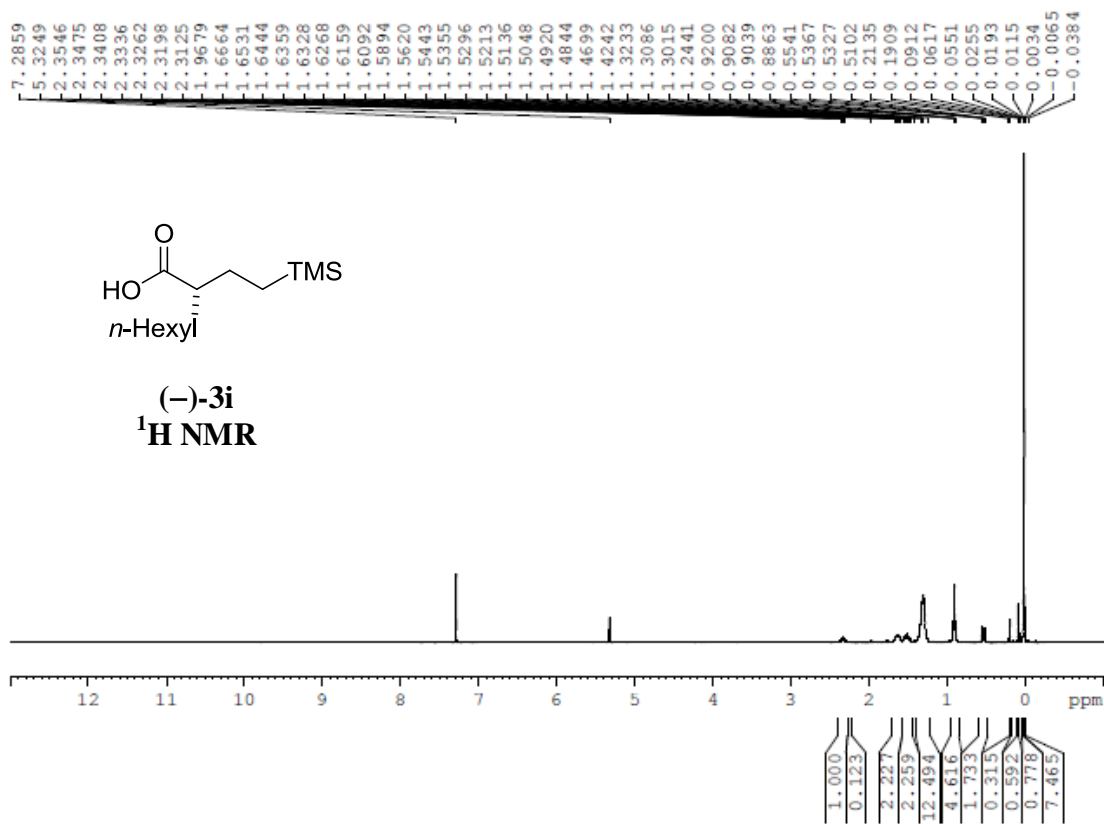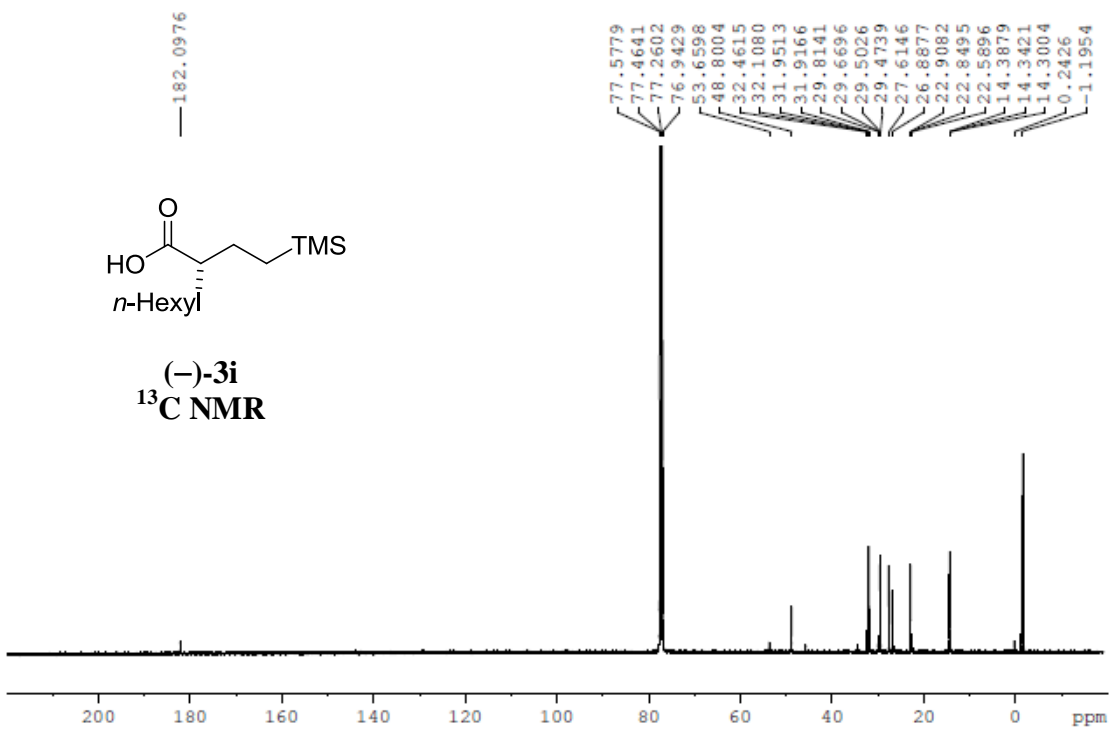

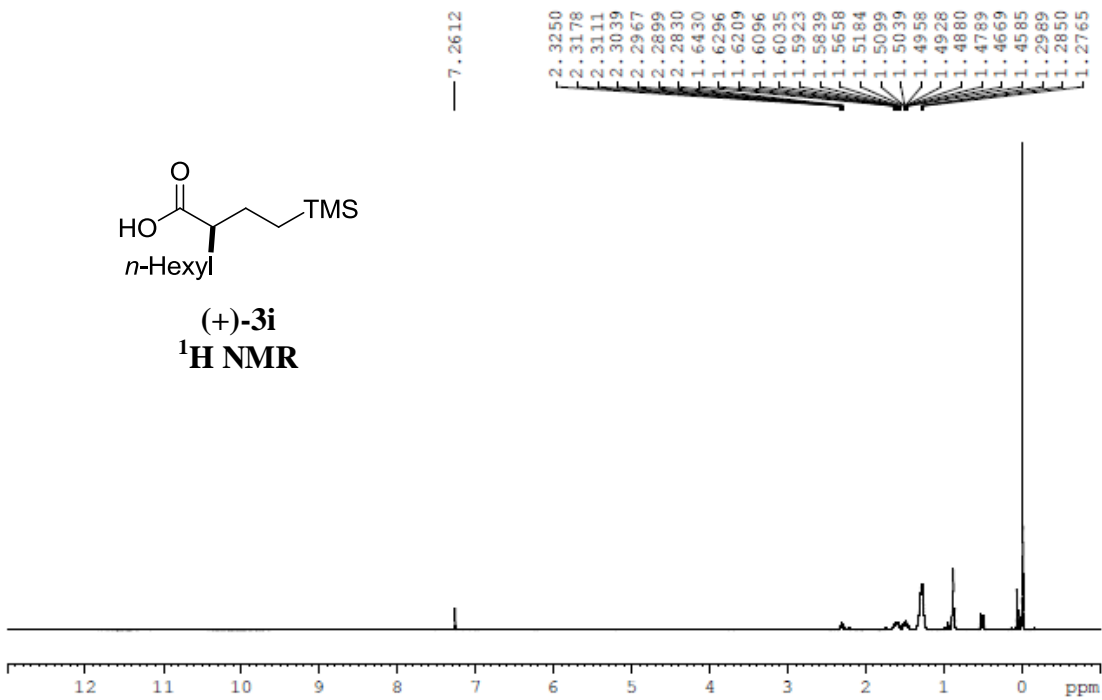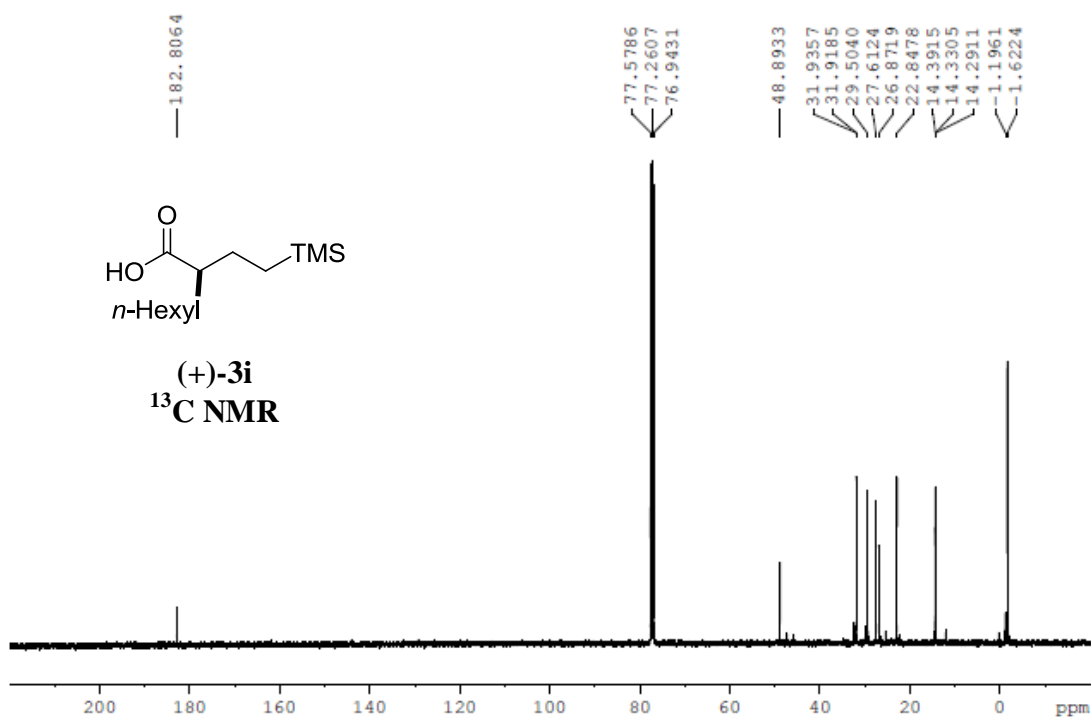

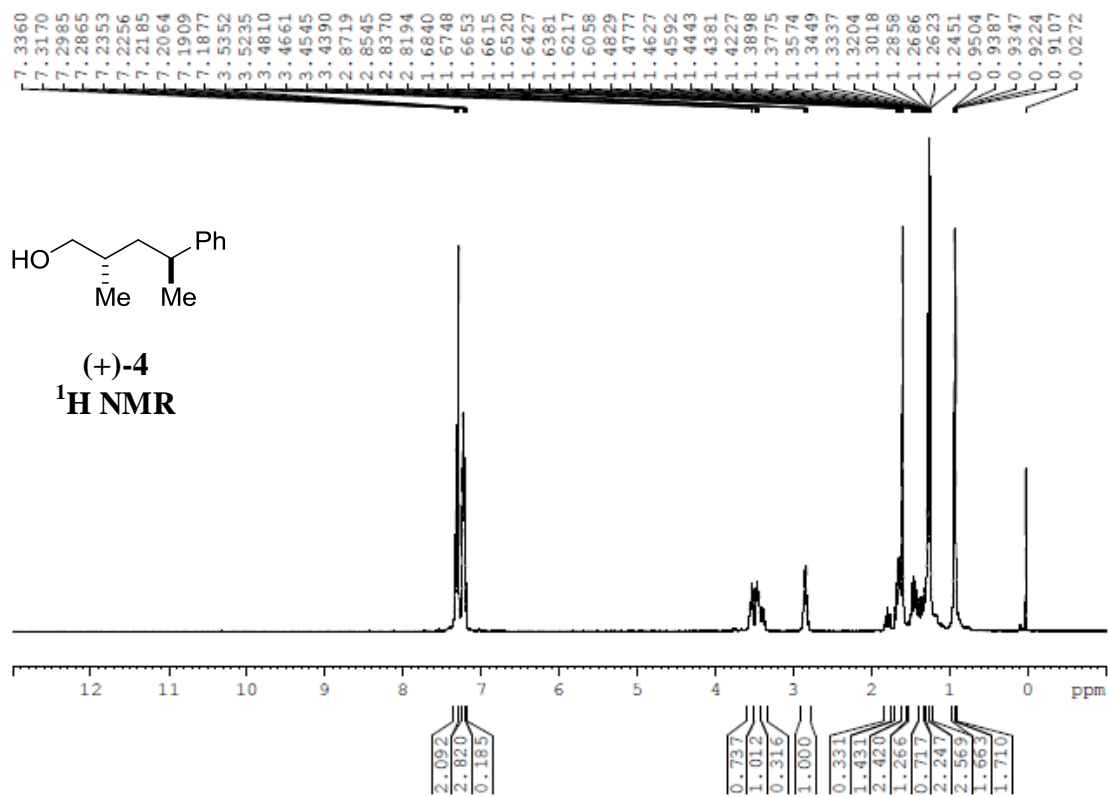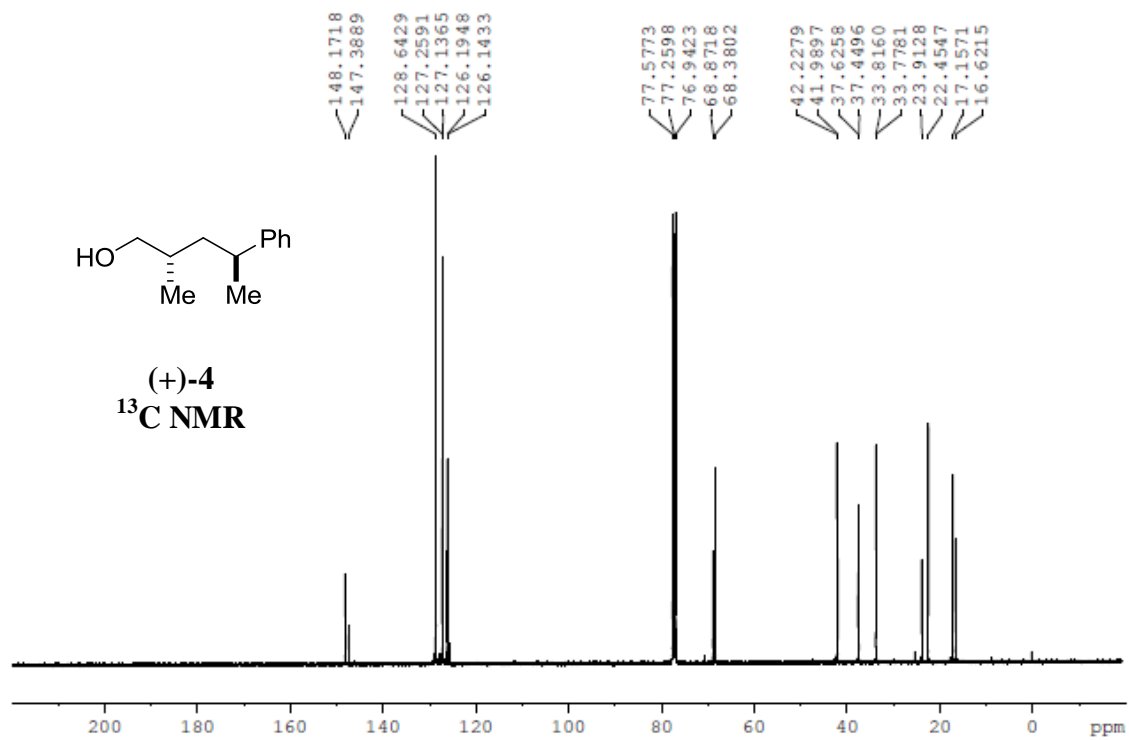

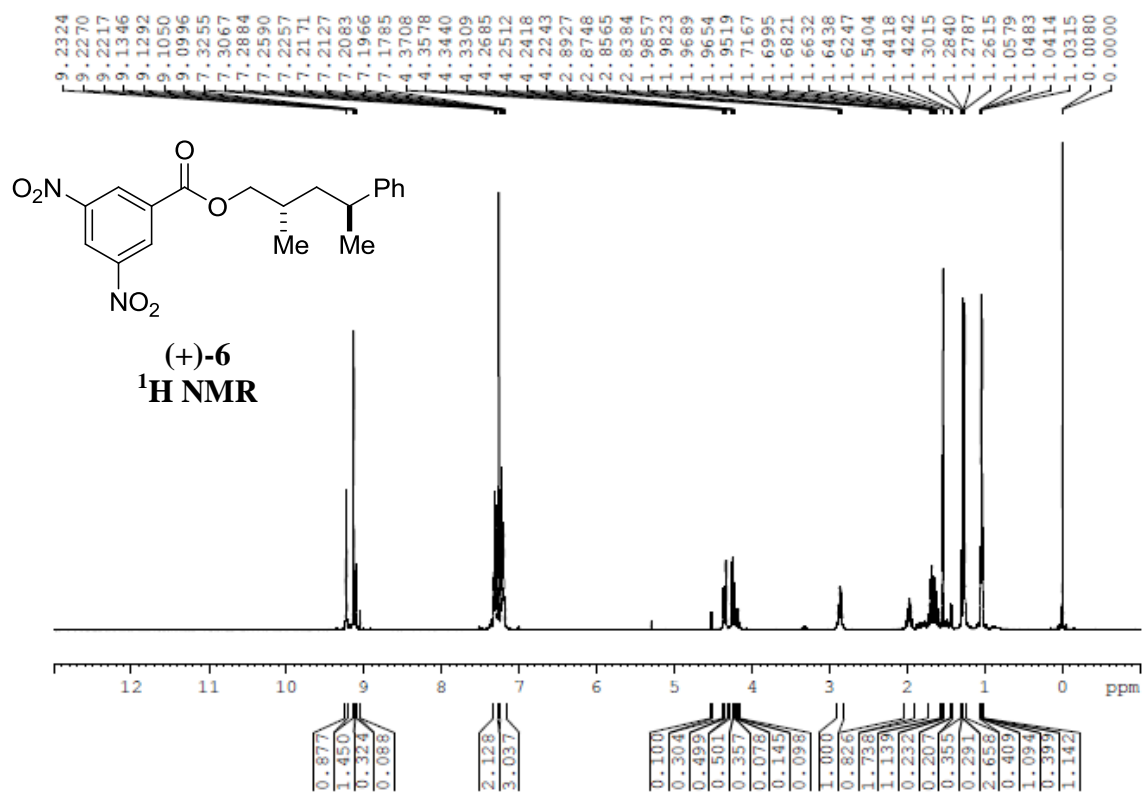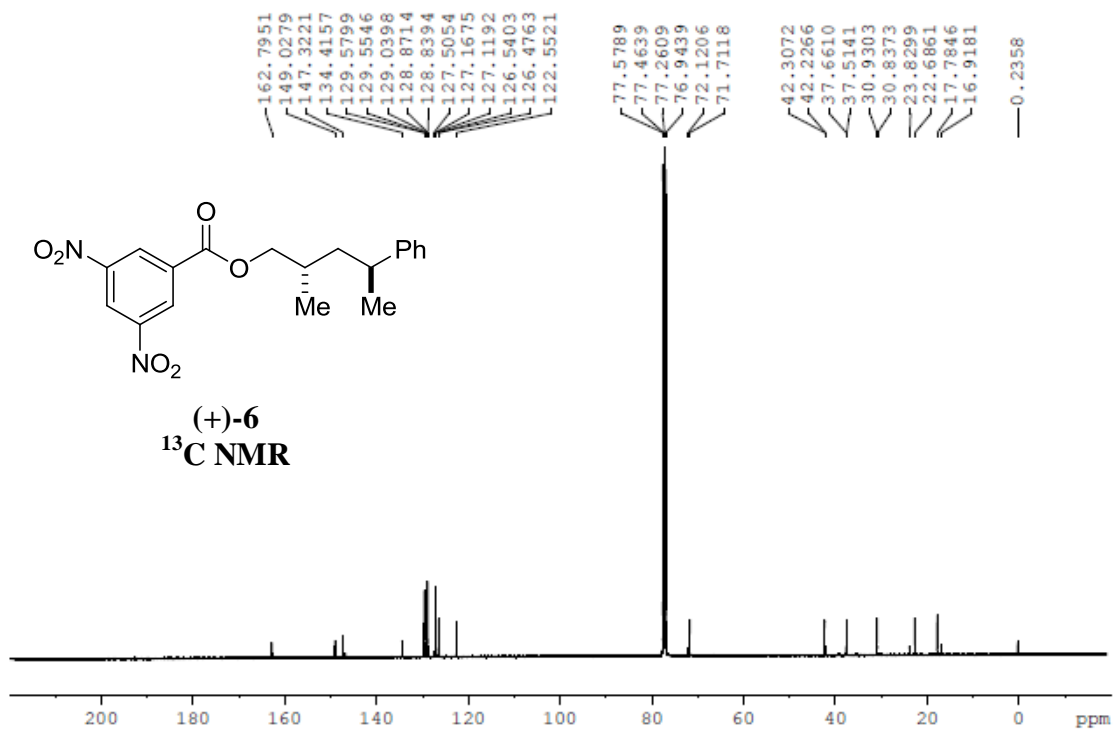



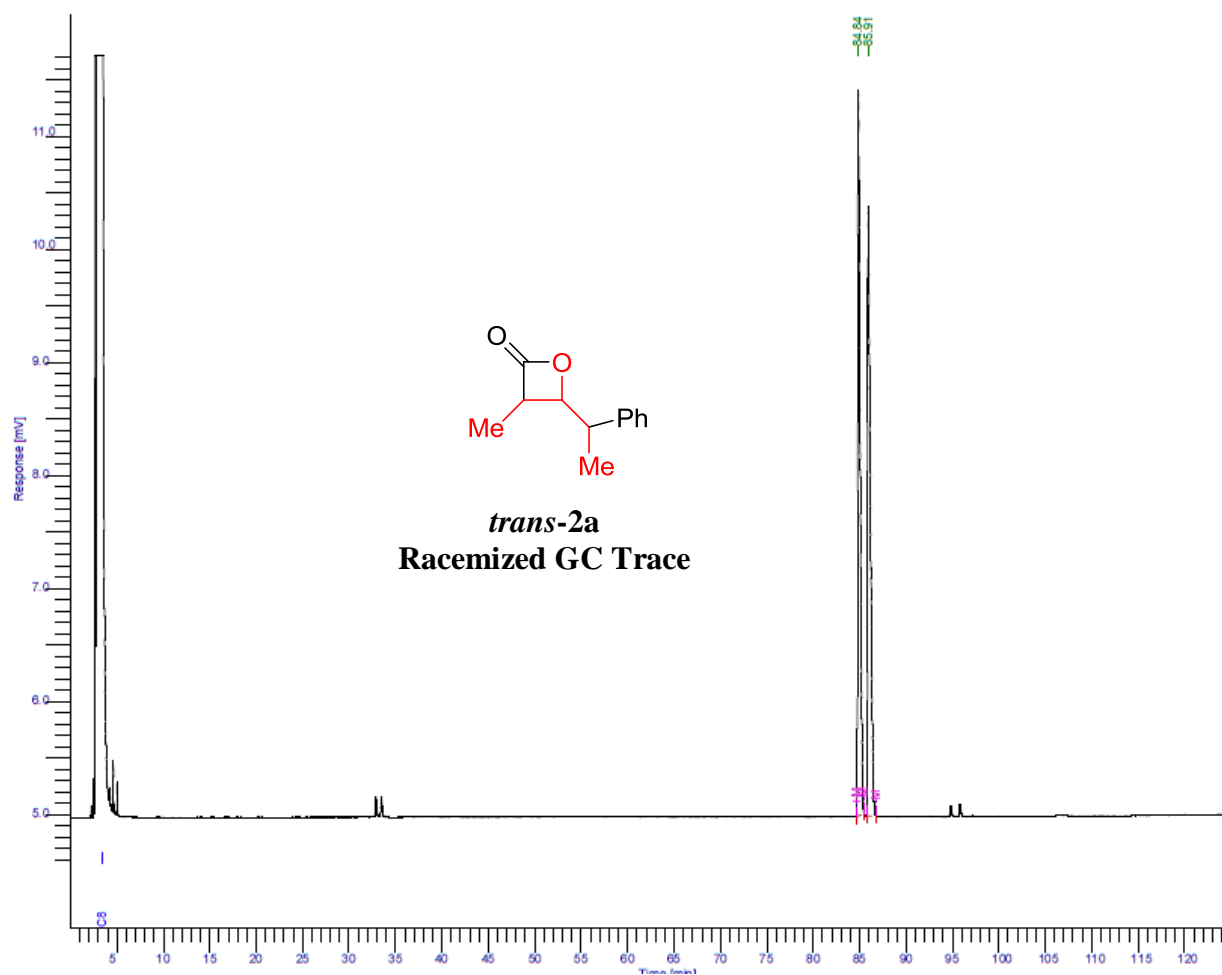

| Peak # | Component Name | Time [min] | Area [uV*sec] | Height [uV] | Area/Amount | Raw Amount |
|--------|----------------|------------|---------------|-------------|-------------|------------|
| 1      |                | 84.837     | 109860.03     | 6393.64     | -----       | -----      |
| 2      |                | 85.910     | 110059.51     | 5393.53     | 1.0000e+06  | 0.1101     |
|        |                |            | 219919.54     | 11787.17    | 1.0000e+06  | 0.1101     |

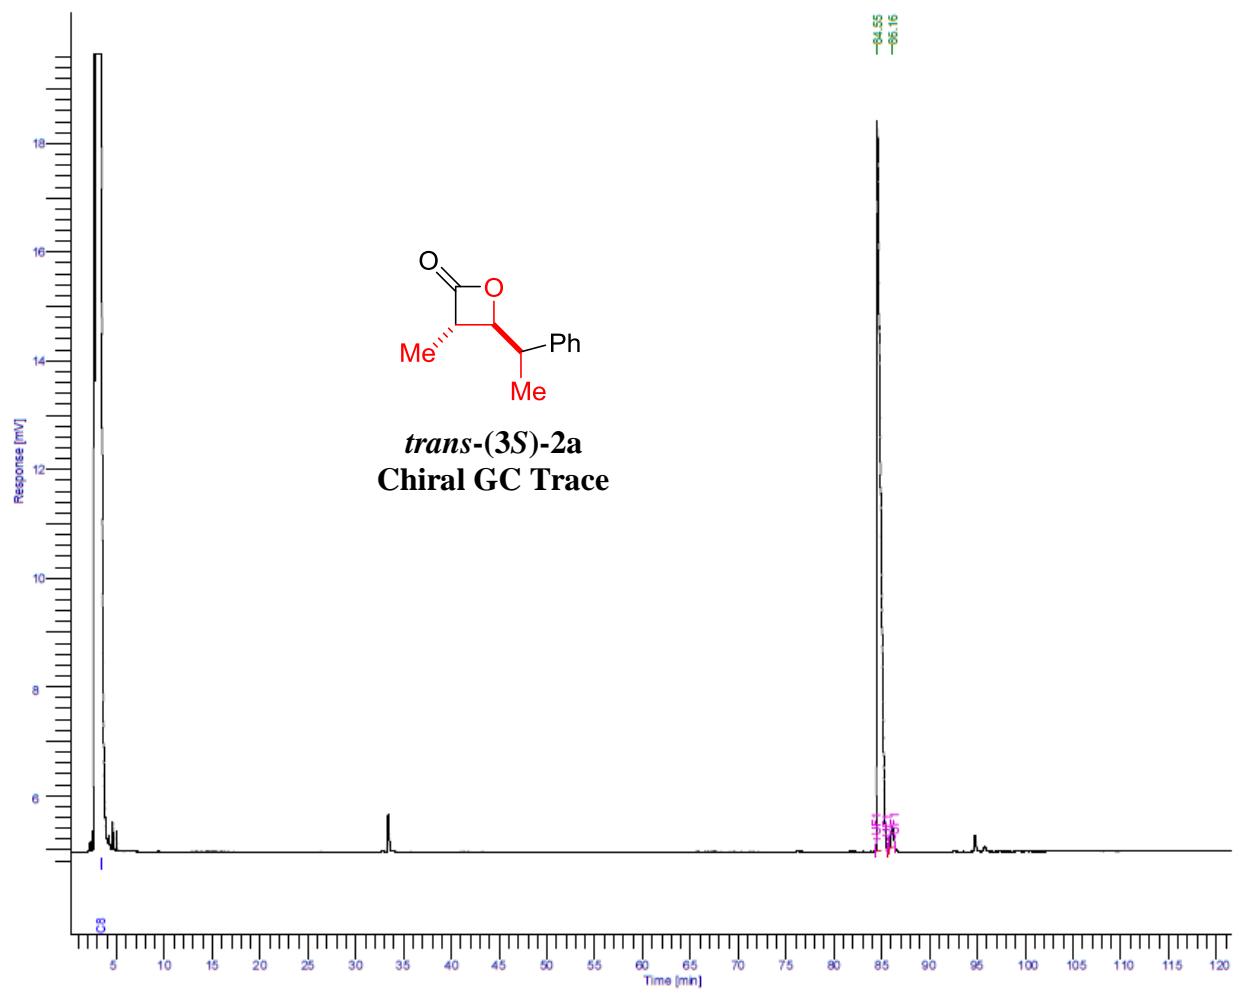

| Peak # | Component Name | Time [min] | Area [uV*sec] | Height [uV] | Area/Amount | Raw Amount |
|--------|----------------|------------|---------------|-------------|-------------|------------|
| 1      |                | 84.555     | 351442.55     | 13276.59    | -----       | -----      |
| 2      |                | 86.160     | 7253.23       | 378.26      | 1.0000e+06  | 0.0073     |
|        |                |            | 358695.78     | 13654.84    | 1.0000e+06  | 0.0073     |

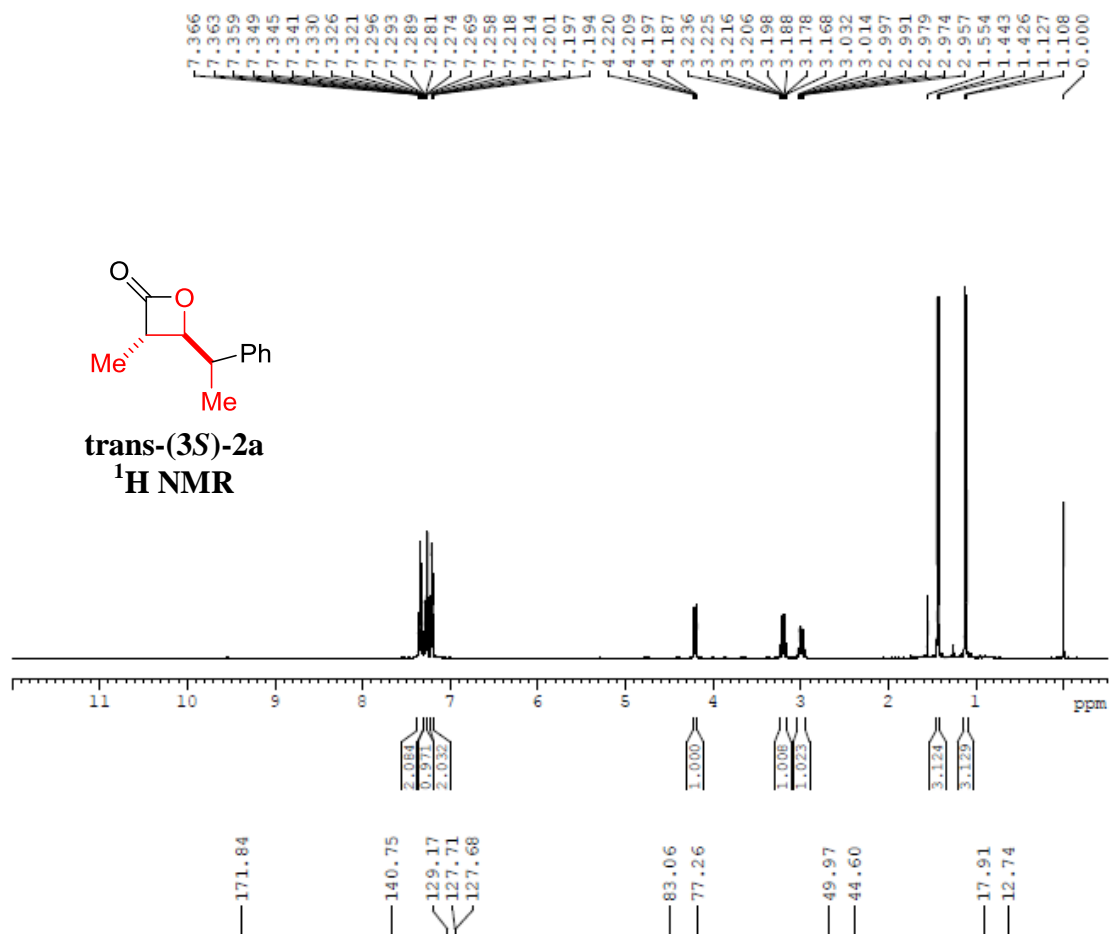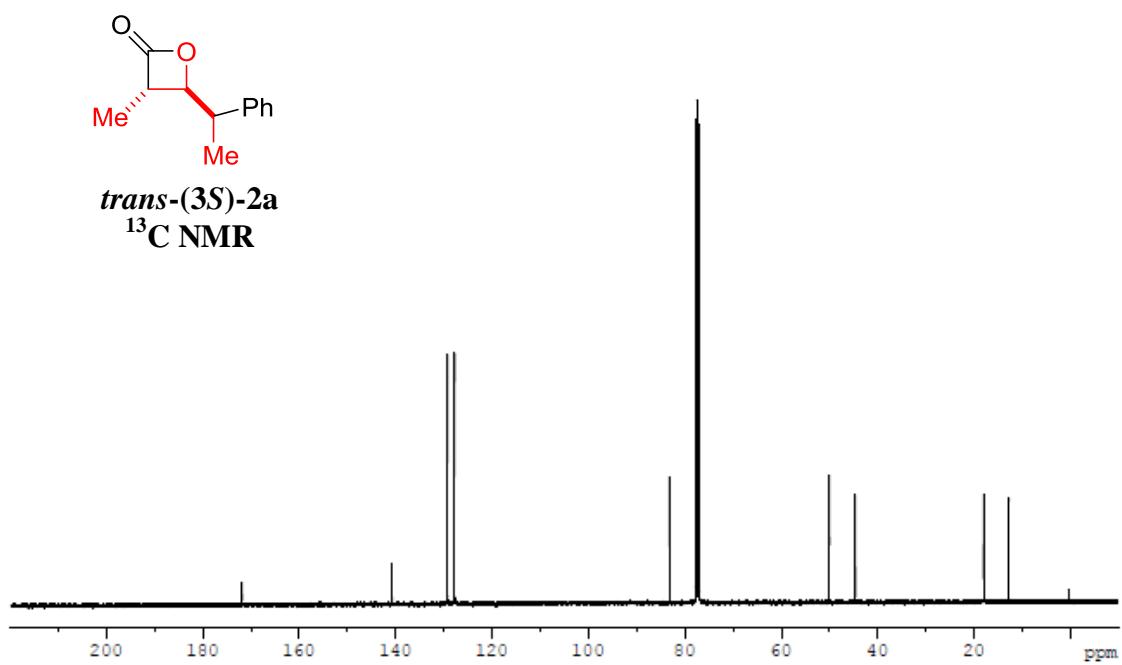

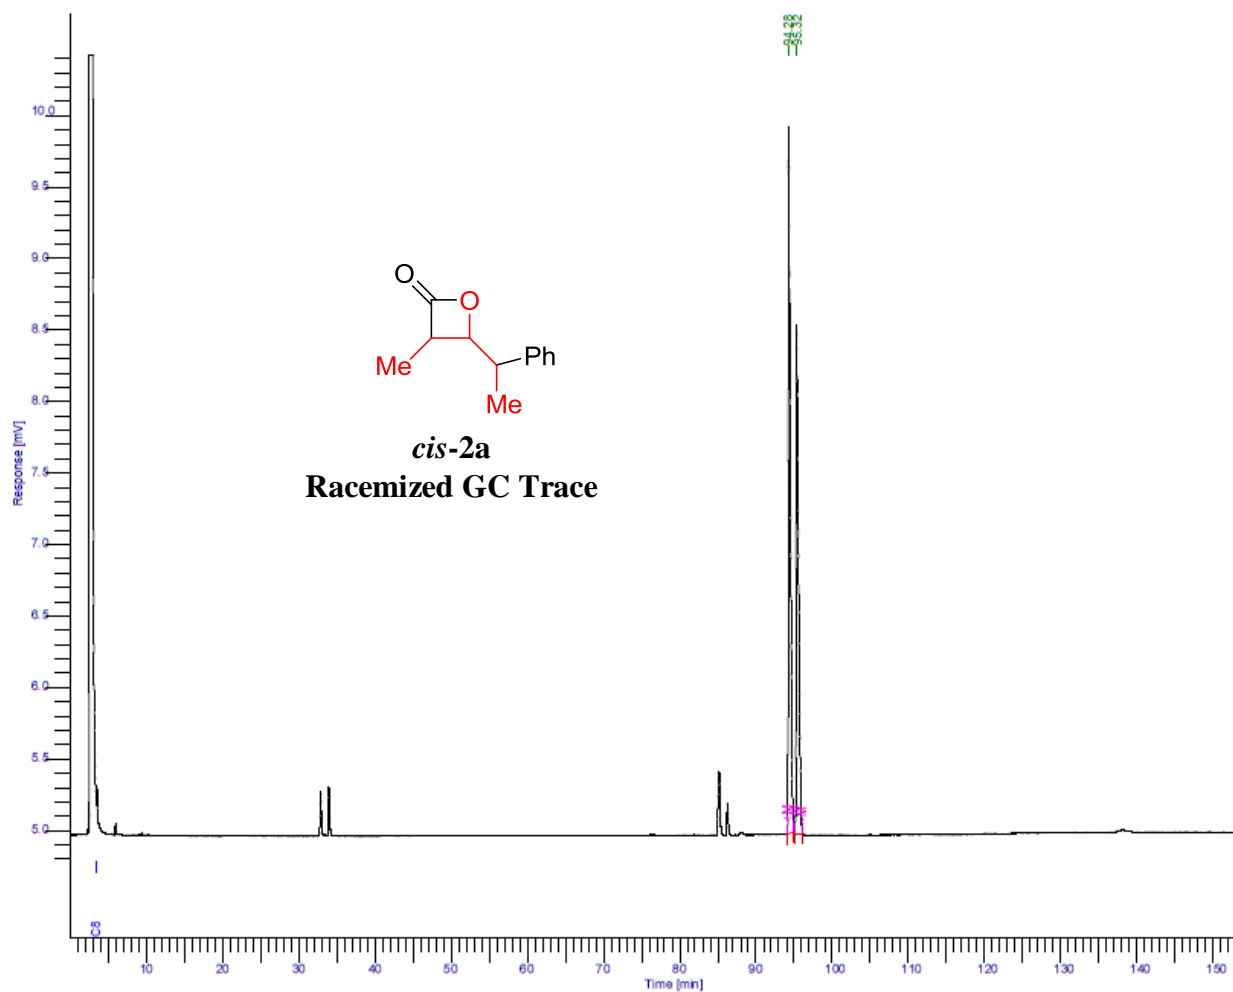

| Peak # | Component Name | Time [min] | Area [uV*sec] | Height [uV] | Area/Amount | Raw Amount |
|--------|----------------|------------|---------------|-------------|-------------|------------|
| 1      |                | 94.283     | 86792.47      | 4949.66     | -----       | -----      |
| 2      |                | 95.323     | 78203.53      | 3562.43     | 1.0000e+06  | 0.0782     |
|        |                |            | 164996.00     | 8512.09     | 1.0000e+06  | 0.0782     |

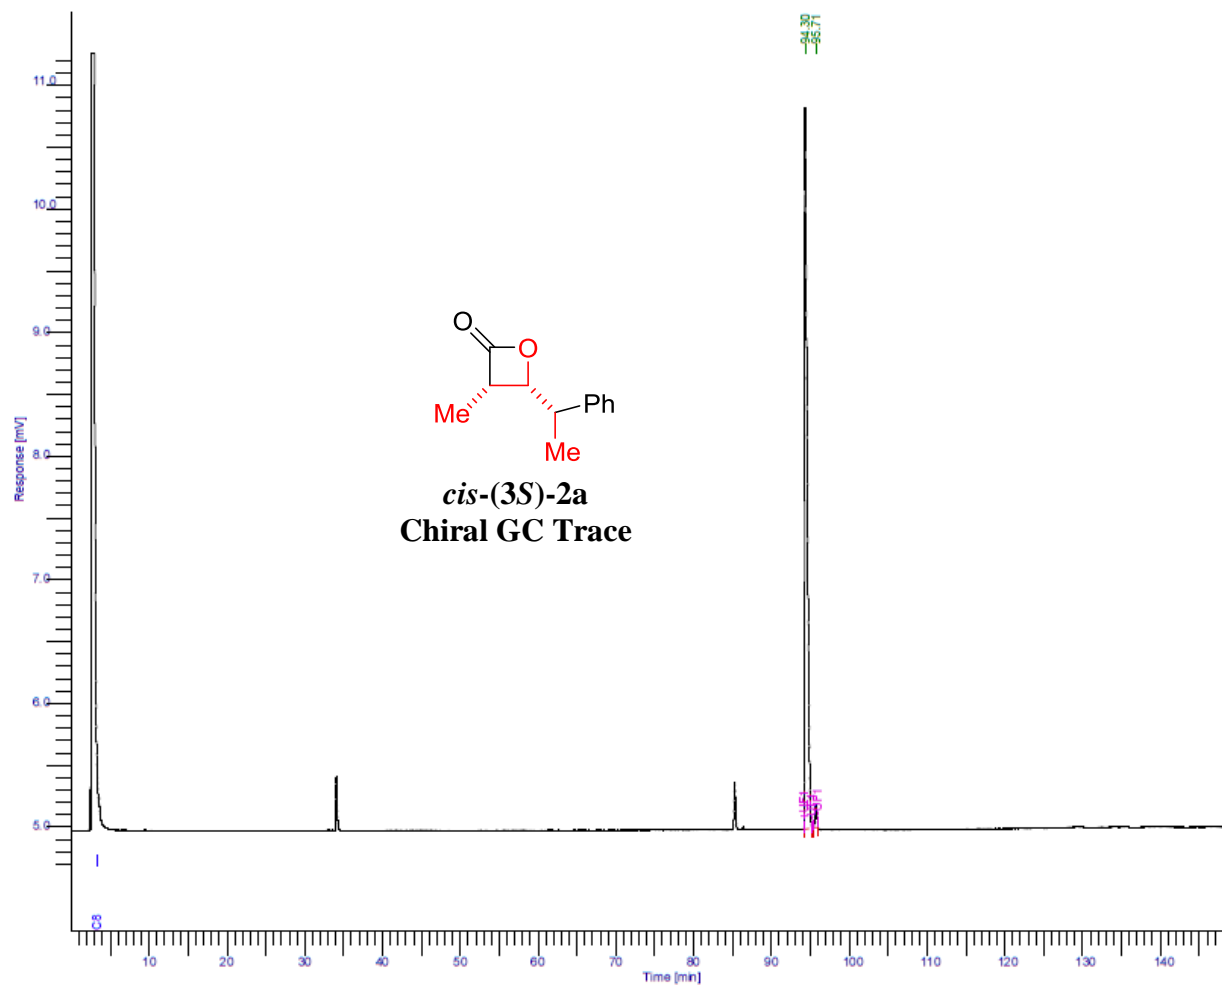

| Peak # | Component Name | Time [min] | Area [uV*sec] | Height [uV] | Area/Amount | Raw Amount |
|--------|----------------|------------|---------------|-------------|-------------|------------|
| 1      |                | 94.304     | 125296.48     | 5833.71     | -----       | -----      |
| 2      |                | 95.712     | 3122.98       | 179.63      | 1.0000e+06  | 0.0031     |
|        |                |            | 128419.46     | 6013.34     | 1.0000e+06  | 0.0031     |

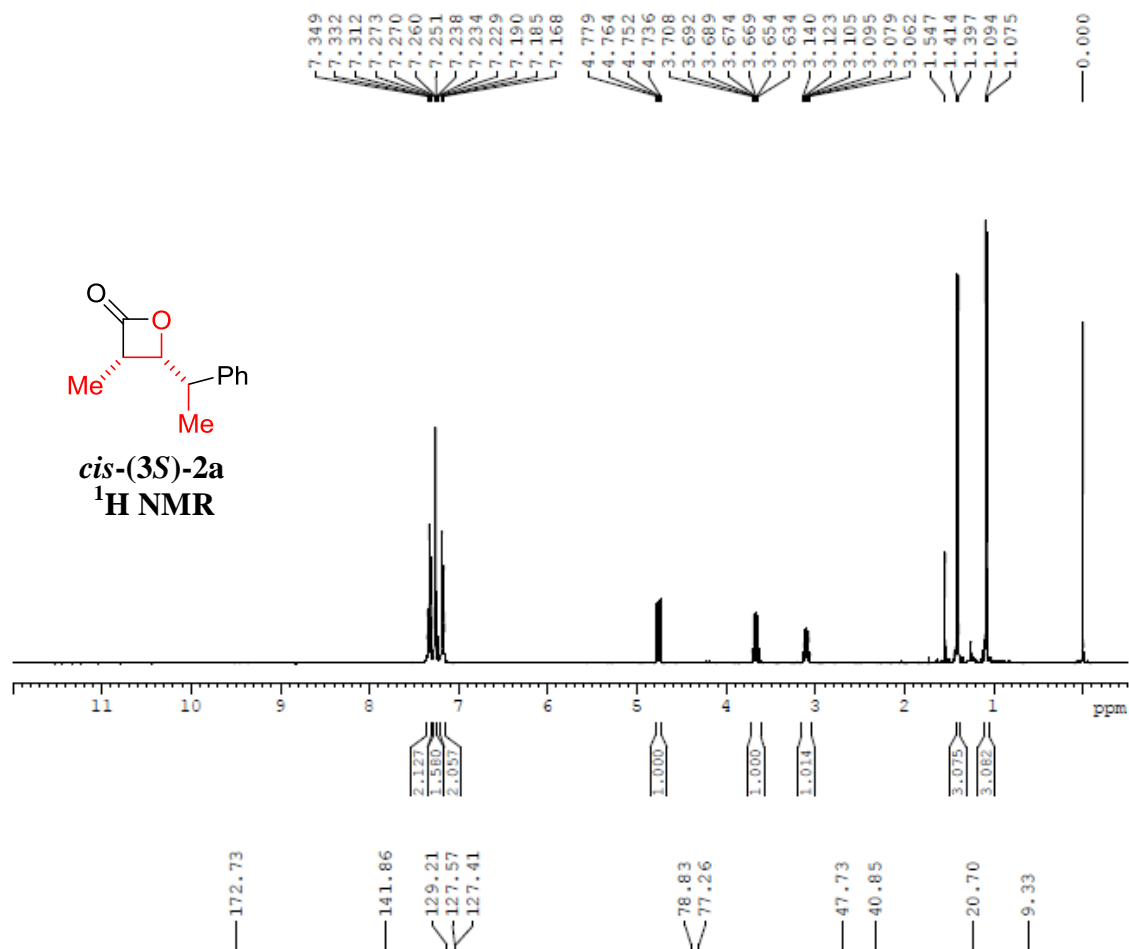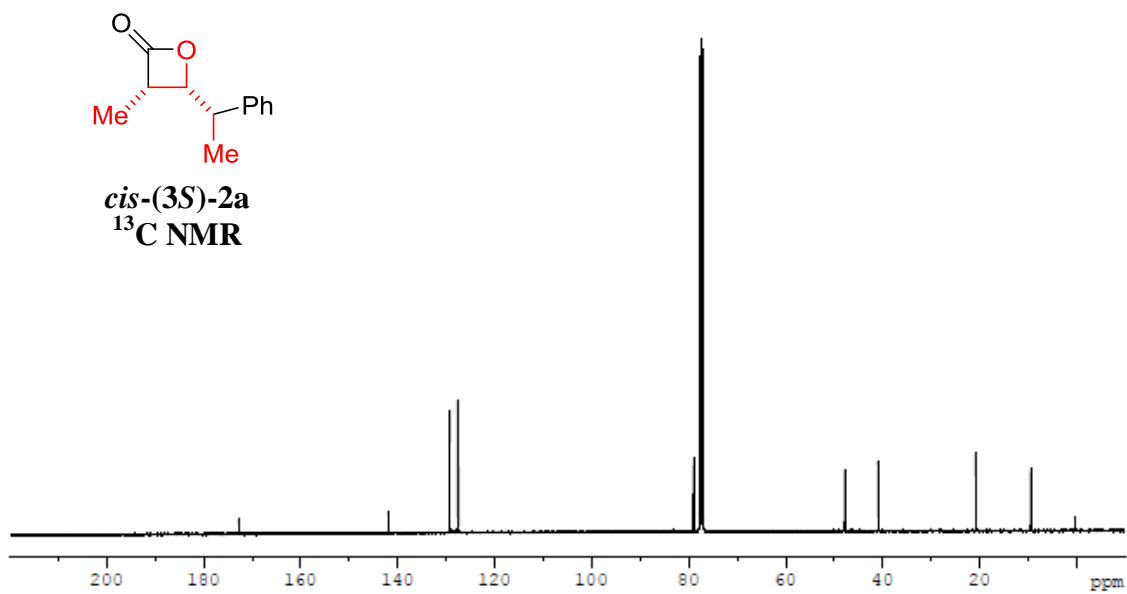

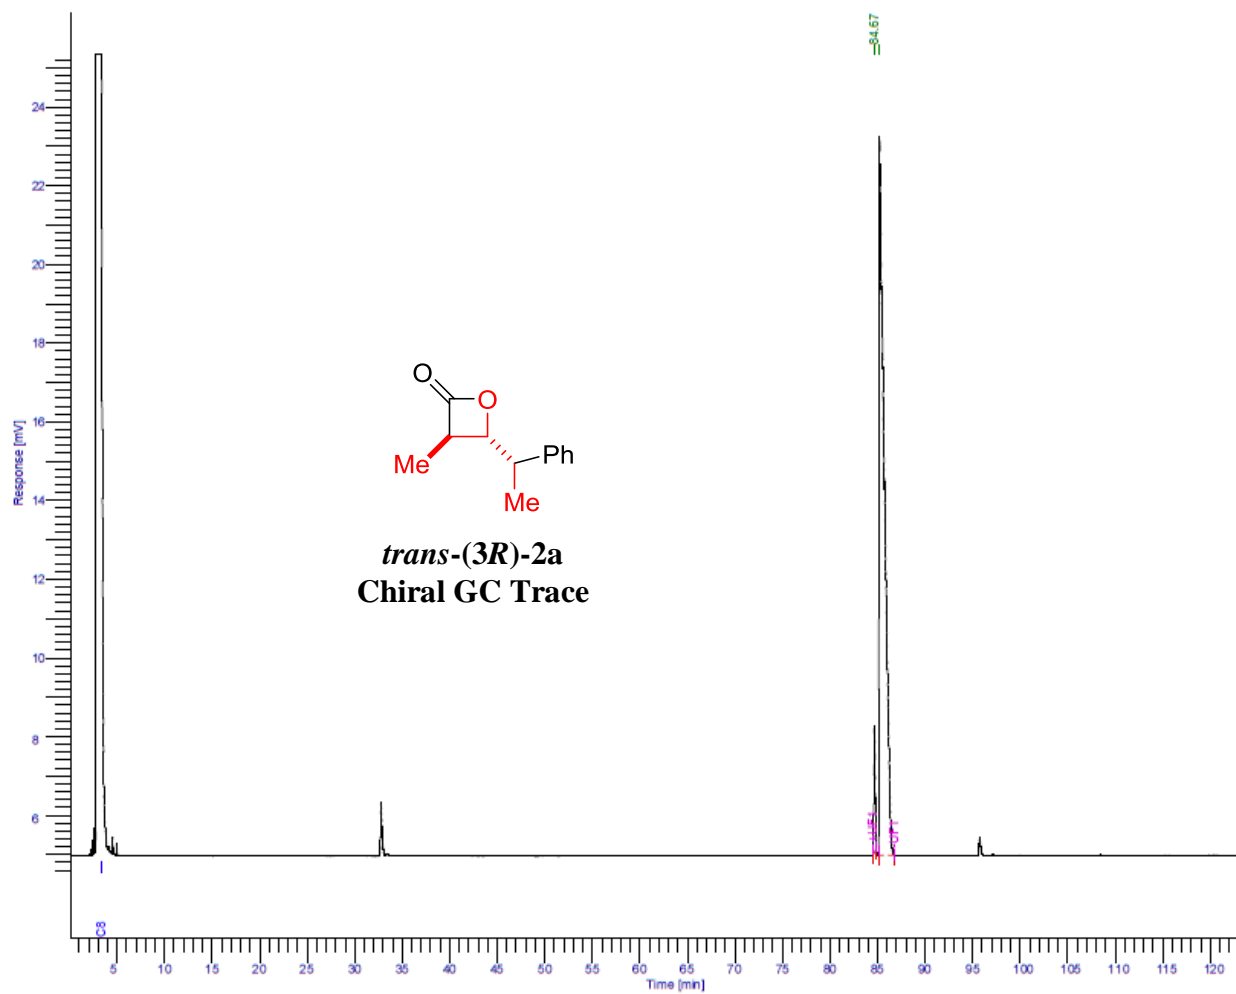

| Peak # | Component Name | Time [min] | Area [uV*sec] | Height [uV] | Area/Amount | Raw Amount |
|--------|----------------|------------|---------------|-------------|-------------|------------|
| 1      |                | 84.667     | 27061.65      | 3228.42     | -----       | -----      |
| 2      |                | 85.200     | 682702.73     | 18276.50    | 1.0000e+06  | 0.6827     |
|        |                |            | 709764.38     | 21504.91    | 1.0000e+06  | 0.6827     |

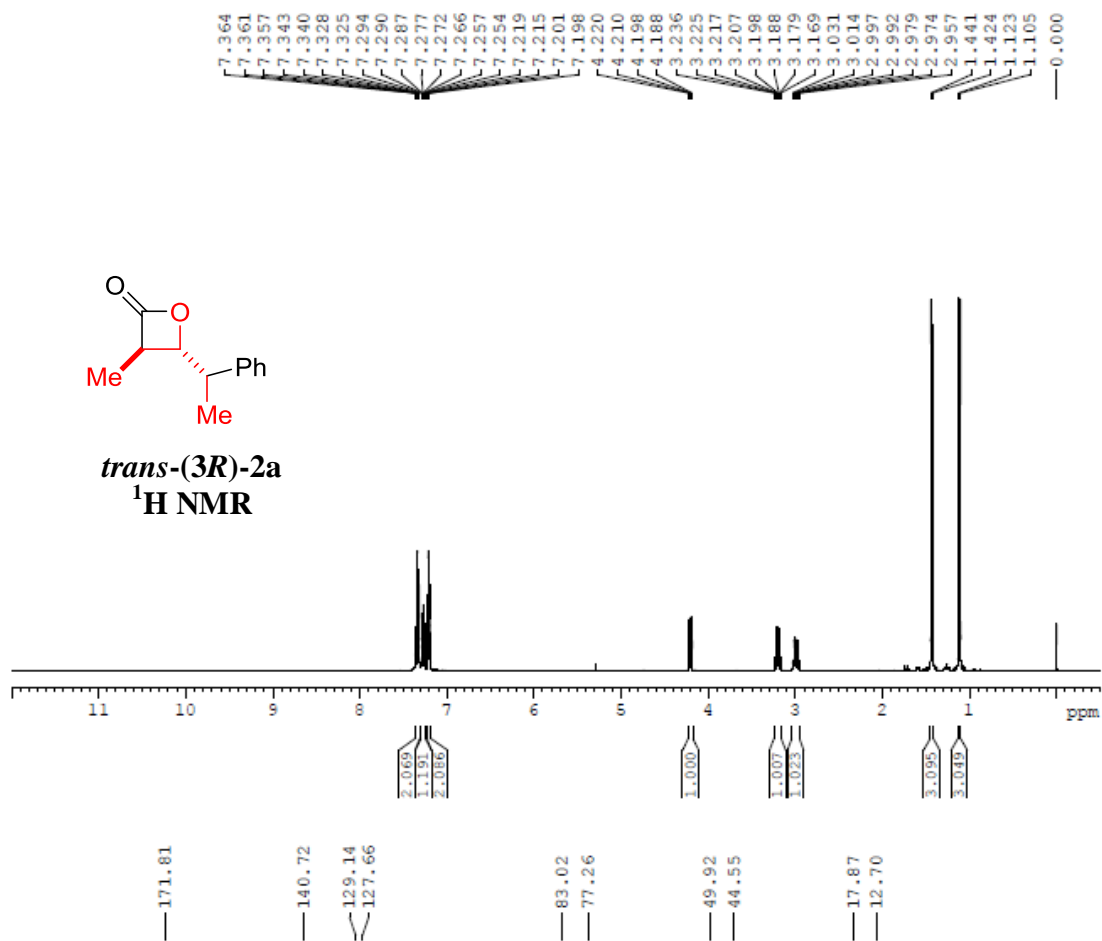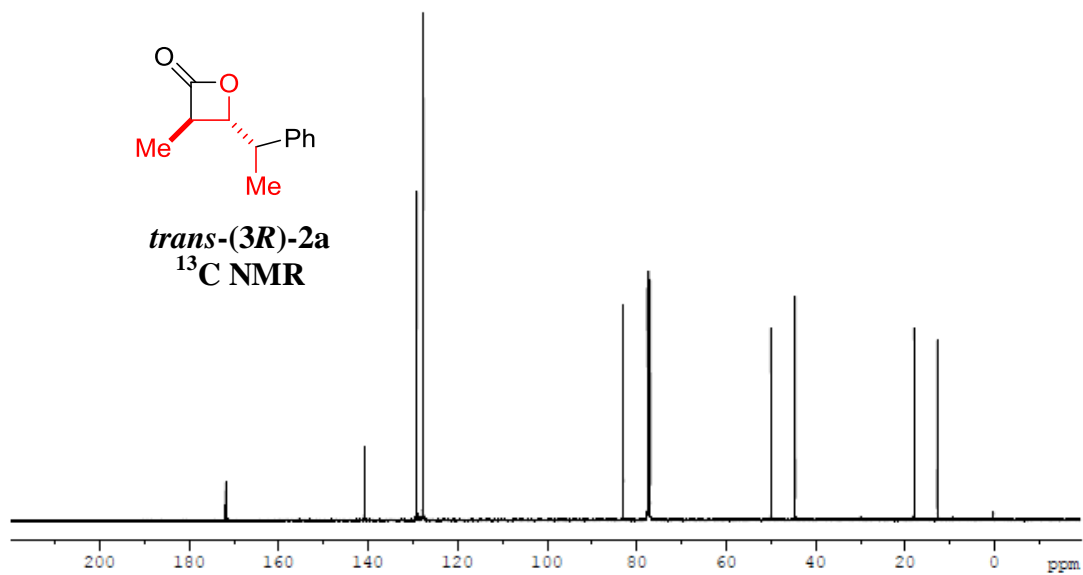



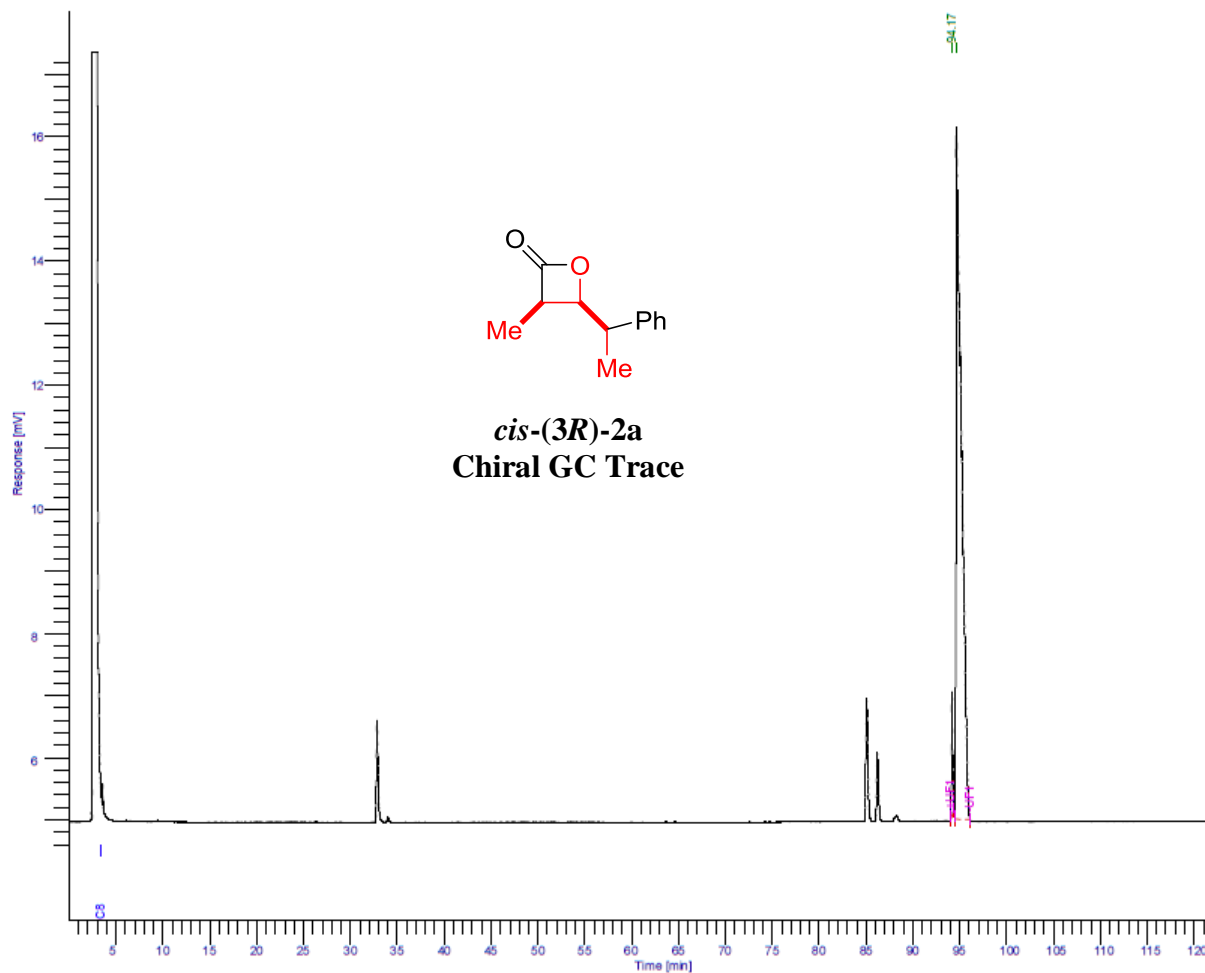

| Peak # | Component Name | Time [min] | Area [uV*sec] | Height [uV] | Area/Amount | Raw Amount |
|--------|----------------|------------|---------------|-------------|-------------|------------|
| 1      |                | 94.171     | 17151.21      | 1996.88     | -----       | -----      |
| 2      |                | 94.629     | 440676.68     | 11138.28    | 1.0000e+06  | 0.4407     |
|        |                |            | 457827.89     | 13135.17    | 1.0000e+06  | 0.4407     |

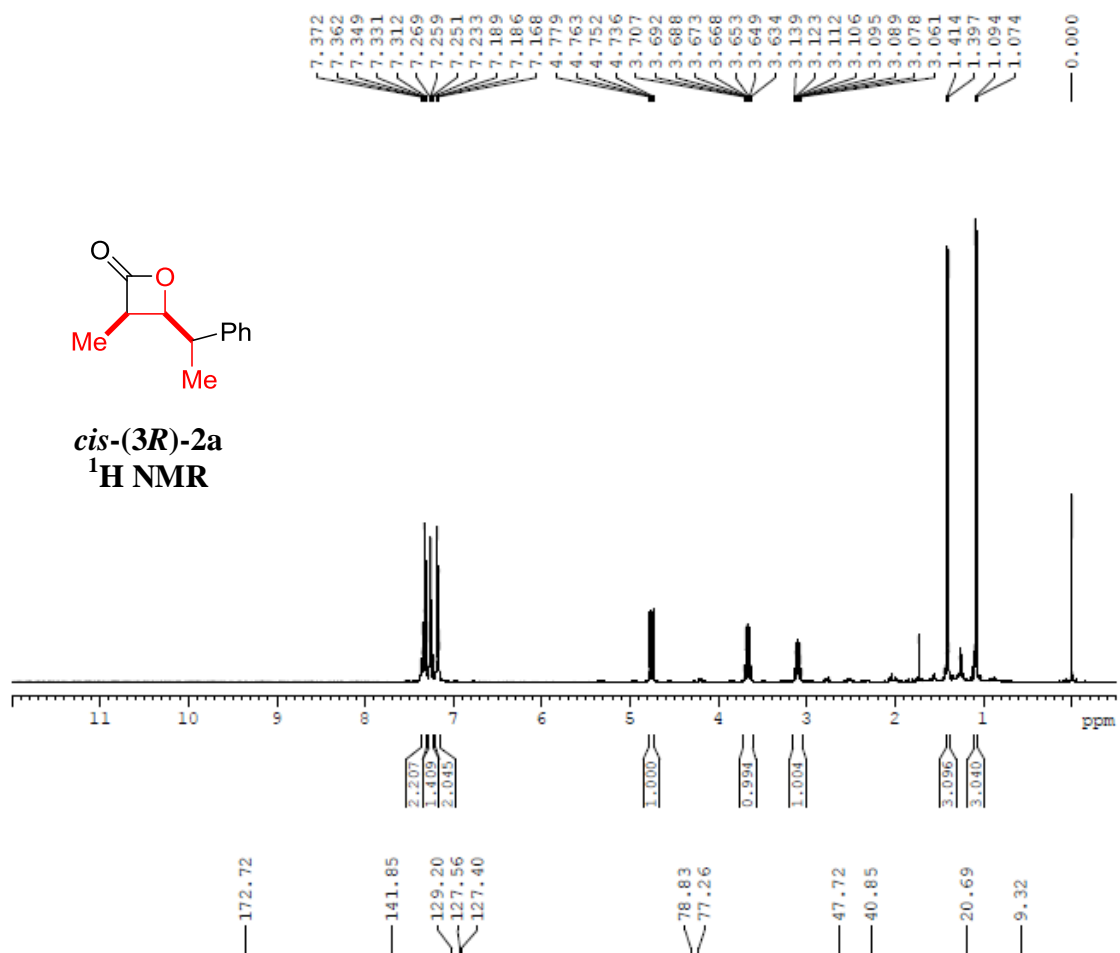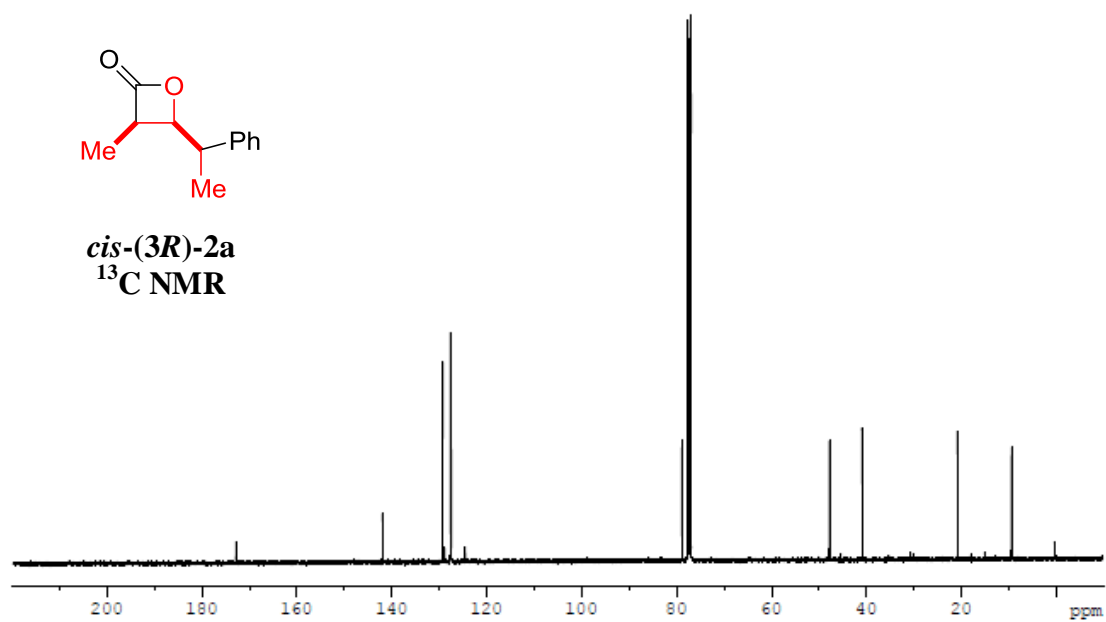

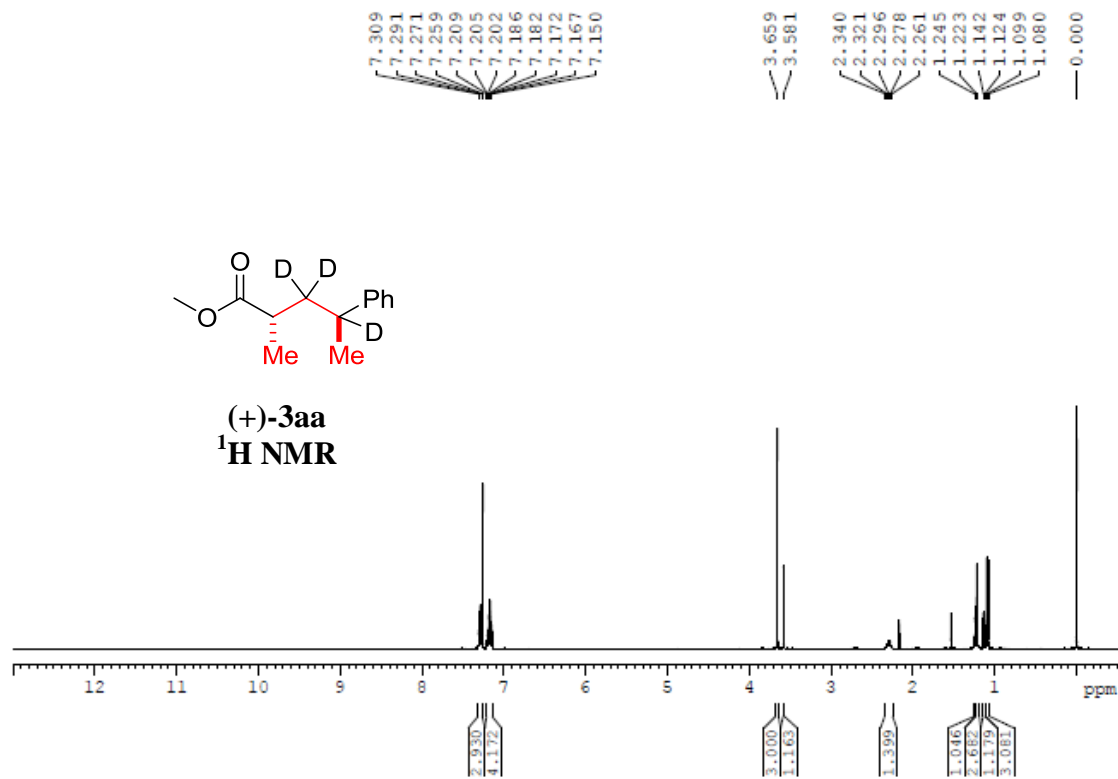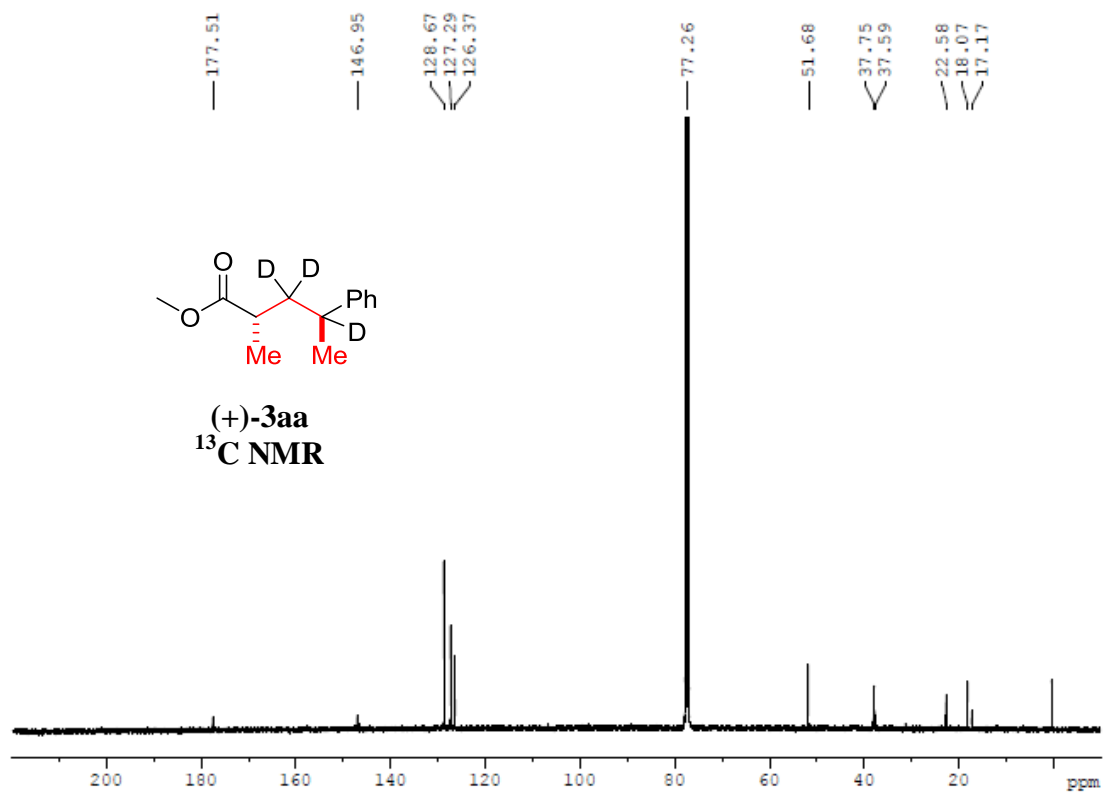

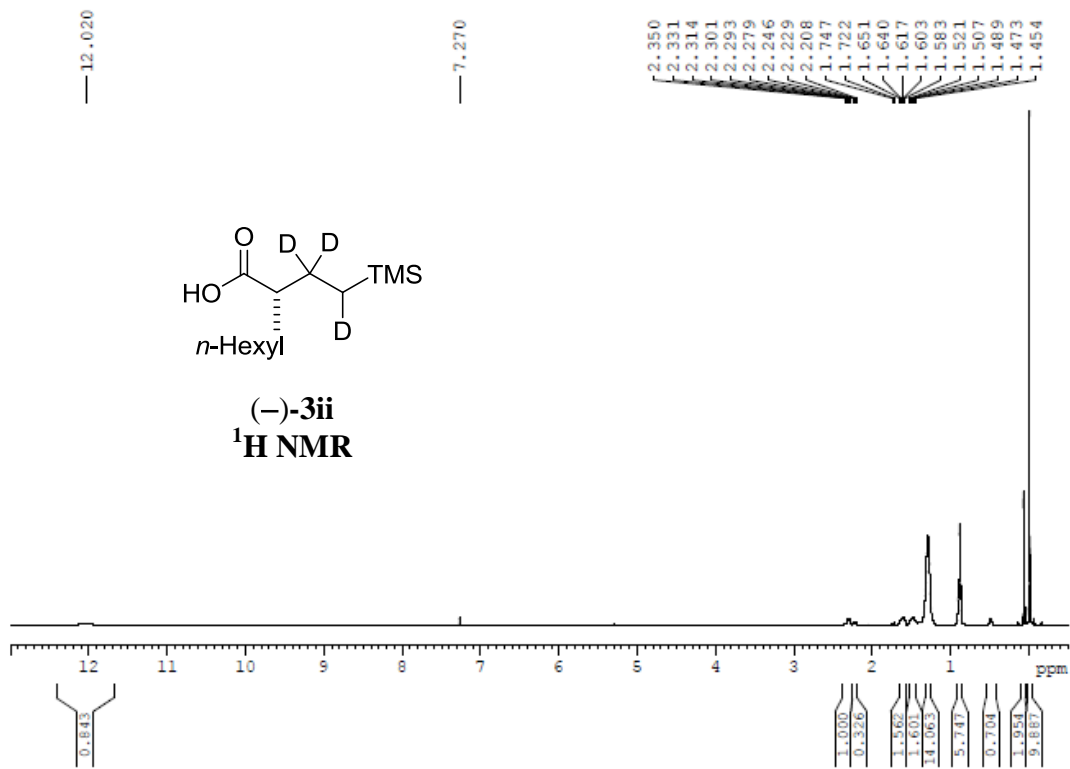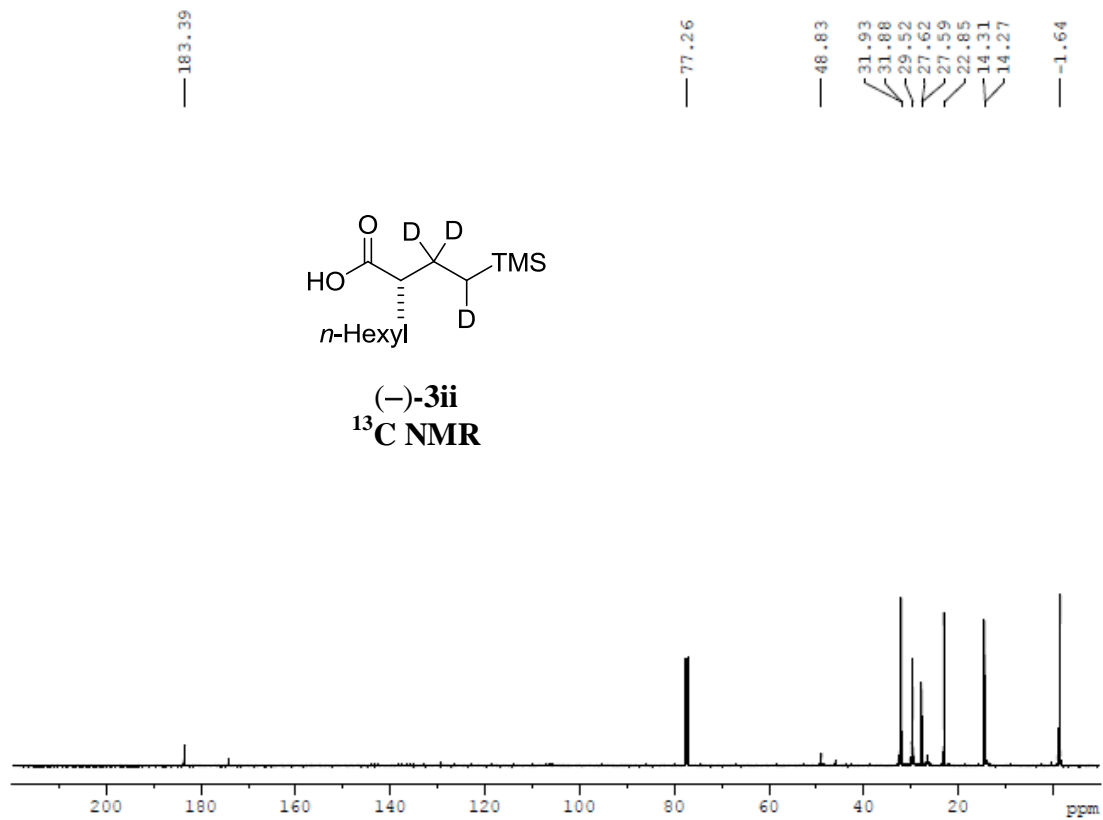

Supplement: NIHMS713066-supplement-SI_Spectra.pdf [file NIHMS713066-supplement-SI_Spectra.pdf]
